# Supplementary material for: RNA sequencing analysis of FGF2-responsive transcriptome in skin fibroblasts
Source: PeerJ. 2021 Jan 15;9:e10671. doi: 10.7717/peerj.10671 (PMC7812929; doi:10.7717/peerj.10671)
Supplement: Supplemental Information 5 [file peerj-09-10671-s005.xlsx]

## Sheet: Sheet1
Additional file 5.Significant biological processes
Term	Count	%	PValue	Genes	List Total	Pop Hits	Pop Total	Fold Enrichment	Bonferroni	Benjamini	FDR
GO:0030198~extracellular matrix organization	48	0.0219088	1.00775e-12	GFAP, PDGFA, LUM, TNC, ELN, COL3A1, ITGB4, ITGA10, VTN, POSTN, DCN, VIT, SOX9, ABI3BP, VCAM1, LAMB3, CRISPLD2, ITGB8, HPSE, TGFBI, LOX, FBN2, THBS1, COL8A2, COL11A1, FN1, COL10A1, COL4A3, COL4A2, COL4A1, COL13A1, OLFML2B, FBN1, CCDC80, HSPG2, ITGA2, SPARC, COL16A1, ECM2, COL5A1, LAMA2, CSGALNACT1, ITGA6, FBLN5, PECAM1, COL1A2, COL1A1, MFAP5	1283	196	16792	3.20524	4.24464e-09	4.24464e-09	1.88317e-09
GO:0001525~angiogenesis	50	0.0228217	1.04288e-11	CYP1B1, ACVRL1, PDGFA, PGF, CXCL8, ANPEP, ENPEP, RORA, ELK3, ESM1, GJA5, MMRN2, TGFB2, NRCAM, WARS, ARHGAP22, PTK2B, FAP, HOXA7, TGFBI, ROBO4, ANGPT1, TMEM100, PIK3R6, ADAM8, COL8A2, RAMP1, ANGPT2, CEACAM1, ANGPTL4, FN1, KLF5, FZD8, FMNL3, COL4A2, VAV3, NOX5, NRXN3, COL15A1, HSPG2, ACKR3, FZD5, ARHGAP24, VEGFD, EREG, DLL4, PECAM1, HIF3A, ADM2, SEMA4A	1283	223	16792	2.93455	4.3926e-08	2.1963e-08	1.94882e-08
GO:0007155~cell adhesion	75	0.0342325	5.57122e-10	MTSS1, NUAK1, FERMT1, VTN, POSTN, BCAM, CXCL12, HMCN2, FAP, TGFBI, COL12A1, ADGRB1, BOC, CEACAM1, CLCA2, ADGRE2, ACKR3, SSPO, PGM5, CD34, CX3CR1, ANOS1, COL1A1, MFAP4, ADAM12, OLFM4, PLXNC1, CYP1B1, TNC, ITGB4, ITGA10, NEDD9, CDH2, CDH4, CDH6, ITGBL1, ALCAM, VCAM1, ISLR, SEMA5A, LAMB4, LAMB3, LPXN, ITGB8, SORBS2, MSLN, MYBPH, CD22, THBS1, THBS2, SELPLG, FN1, COL4A3, TNXB, SVEP1, HAPLN3, OLR1, POD…	1283	459	16792	2.13857	2.34659e-06	7.82199e-07	1.04109e-06
GO:0030335~positive regulation of cell migration	40	0.0182573	3.97095e-09	PDGFA, FERMT3, F2RL1, EDN1, LRRC15, GTSE1, CCL26, SEMA5A, PTK2B, SEMA7A, SEMA3E, SEMA3D, ADRA2A, SEMA3C, SEMA3B, PDGFD, THBS1, MYOC, IRS2, NTF3, ARHGEF39, PODXL, HGF, CCL11, ITGA6, CARMIL2, F3, RRAS2, CXCL16, CARMIL1, HBEGF, TCAF2, ROR2, HAS2, WNT11, CPNE3, COL1A1, CTSH, PLAU, SEMA4A	1283	184	16792	2.84523	1.67255e-05	4.1814e-06	7.4205e-06
GO:0030574~collagen catabolic process	22	0.0100415	5.00137e-09	COL4A3, COL4A2, COL4A1, ADAMTS14, COL13A1, COL3A1, MMP27, COL15A1, MMP16, CTSS, MMP3, MMP1, COL5A1, MMP10, COL26A1, COL1A2, COL12A1, COL1A1, ADAMTS2, COL8A2, COL11A1, COL10A1	1283	64	16792	4.49903	2.10655e-05	4.21314e-06	9.34603e-06
GO:0045766~positive regulation of angiogenesis	29	0.0132366	2.69759e-08	WNT5A, C3AR1, ACVRL1, CYP1B1, PGF, CXCL8, SEMA5A, PTGIS, PTK2B, GATA6, CCBE1, IL1B, PIK3R6, THBS1, RUNX1, ANGPT2, ANGPTL4, C5AR1, HGF, BRCA1, ANXA3, CCL11, VEGFD, ADM, CD34, F3, CX3CR1, ADM2, CTSH	1283	115	16792	3.30047	0.000113616	1.89369e-05	5.04098e-05
GO:0030199~collagen fibril organization	16	0.00730293	7.01758e-08	FMOD, TNXB, CYP1B1, ADAMTS14, LUM, COL3A1, SERPINH1, COL5A1, TGFB2, COL1A2, COL12A1, FOXC1, COL1A1, LOX, ADAMTS2, COL11A1	1283	39	16792	5.36947	0.000295537	4.22249e-05	0.000131137
GO:0071560~cellular response to transforming growth factor beta stimulus	17	0.00775937	3.62957e-07	WNT5A, MEF2C, COL4A2, ACVRL1, STAR, FBN1, EDN1, PDE3A, POSTN, SOX6, SOX9, WNT2, SFRP1, CLEC3B, CX3CR1, COL1A1, PDGFD	1283	49	16792	4.54076	0.00152761	0.000191078	0.000678253
GO:0007565~female pregnancy	23	0.010498	6.19104e-07	MUC1, CLDN4, CORIN, PGF, TGFB3, PSG2, PSG3, ITGA2, OXTR, FOSB, PSG1, COL16A1, PTHLH, FOS, PSG9, THBD, ADM, PSG7, PSG6, PSG5, PSG4, SLC38A1, IGFBP5	1283	89	16792	3.38231	0.00260427	0.000289699	0.00115691
GO:0007267~cell-cell signaling	43	0.0196266	1.54356e-06	FGF5, FGFR3, CXCL5, ADORA2A, PDGFA, PGF, FGF14, NDP, EFNA3, EDN1, GDF5, FCRL2, FGF13, ENPEP, CXCL6, TNFSF18, CCL26, TGFB2, SEMA5A, WNT2, PTGIR, BDNF, IL1B, SEMA3B, SRD5A2, NTF3, BST2, FZD1, PTHLH, AMH, INHBA, ADRB2, ADM, EREG, CXCL14, PKP4, ADRA1B, FJX1, TFAP2C, AREG, WNT9A, ADRA1D, NGF	1283	254	16792	2.2157	0.00648038	0.000649935	0.0028844
GO:0010628~positive regulation of gene expression	43	0.0196266	3.50237e-06	MEF2C, WNT16, NOG, STAR, ERBB3, LRRC32, TNC, VIM, MITF, IQGAP3, PTPN22, PAWR, CITED2, TGFB2, VDR, ACTG2, OSR2, ANK3, ITGB8, CYP26B1, IL1B, RAB27A, FN1, ACTC1, PLP1, ACTA2, RNF207, HMGA2, BRCA1, AMH, INHBA, ATF4, ID2, RPS6KA2, CD34, DLL4, SFRP4, RGCC, WNT11, ADM2, CTSH, KLF4, NGF	1283	262	16792	2.14804	0.0146437	0.00134019	0.00654465
GO:0001501~skeletal system development	28	0.0127801	4.17553e-06	ALPL, NOG, FGFR3, PTH1R, COL3A1, JAG2, POSTN, ZBTB16, SOX9, GJA5, TGFB2, VDR, COL12A1, COL10A1, HAPLN3, BMP1, CMKLR1, FBN1, IGF2, NPR3, PRELP, PTHLH, CDKN1C, RASSF2, COL1A2, FOXC1, COL1A1, BMP6	1283	137	16792	2.67494	0.0174336	0.00146454	0.00780251
GO:0007229~integrin-mediated signaling pathway	23	0.010498	4.20059e-06	PLP1, VAV3, FERMT3, COL3A1, FERMT2, ITGB4, ITGA10, ITGA2, NEDD9, COL16A1, ITGBL1, LAT, ITGA6, PTK2B, ITGB8, SEMA7A, PRAM1, ADAMTS10, ADAM33, ADAMTS1, ADAM8, ADAM12, CEACAM1	1283	99	16792	3.04066	0.0175373	0.00136007	0.00784934
GO:0000070~mitotic sister chromatid segregation	11	0.00502077	7.32869e-06	KIFC1, MAD2L1, CENPA, PLK1, NEK2, SPAG5, ZWINT, NUSAP1, KIF18B, NDC80, ESPL1	1283	25	16792	5.75875	0.030397	0.00220247	0.0136942
GO:0010575~positive regulation of vascular endothelial growth factor production	11	0.00502077	1.64207e-05	C3AR1, ATF4, CYP1B1, C5AR1, SULF2, HPSE, CCBE1, SULF1, IL1B, RORA, BRCA1	1283	27	16792	5.33218	0.066827	0.00460036	0.0306809
GO:0042060~wound healing	19	0.00867224	2.57271e-05	WNT5A, NOG, EPPK1, ERBB3, PDGFA, TNC, COL3A1, TGFB3, SPARC, IL24, ELK3, DCN, TPM1, TGFB2, MAP3K5, EREG, PECAM1, LOX, FN1	1283	80	16792	3.10842	0.102699	0.00674986	0.0480652
GO:0007067~mitotic nuclear division	39	0.0178009	2.86005e-05	KIF22, NEK2, NEDD9, ANLN, CEP55, AURKB, PTTG1, SPC24, OFD1, KIF2C, FIGN, BUB1, SKA3, SKA1, CCNA2, CDCA5, TUBB3, CDCA3, ERCC6L, KIF15, NUF2, TPX2, CENPF, NDC80, CDC20, BIRC5, PBK, HGF, CDC25C, HMGA2, WEE1, PLK5, CCNB2, PLK1, KLHL13, BUB1B, HAUS7, CIT, CENPX	1283	248	16792	2.05821	0.113494	0.00706126	0.0534322
GO:0007160~cell-matrix adhesion	20	0.00912867	3.99986e-05	EPDR1, LYPD5, COL13A1, STRC, COL3A1, FERMT2, ITGB4, ITGA10, ITGA2, BCAM, VTN, ECM2, VCAM1, COL17A1, ITGA6, HPSE, ITGB8, CD34, FBLN5, MSLN	1283	90	16792	2.90846	0.15505	0.0093162	0.0747188
GO:0060395~SMAD protein signal transduction	16	0.00730293	4.88449e-05	SMAD9, BMP1, NCEH1, GDF7, GDF6, GDF5, VIM, TGFB3, TGFB2, INHBB, FOS, INHBA, INHBE, ROR2, BMP6, BTBD11	1283	62	16792	3.37757	0.185955	0.01077	0.0912369
GO:0016525~negative regulation of angiogenesis	16	0.00730293	4.88449e-05	COL4A3, COL4A2, SPARC, DCN, GPR4, CX3CR1, SEMA3E, RGCC, SULF1, FOXC1, THBS1, ADGRB1, THBS2, ANGPT2, SEMA4A, ADGRB2	1283	62	16792	3.37757	0.185955	0.01077	0.0912369
GO:0002040~sprouting angiogenesis	10	0.00456433	5.69493e-05	PGF, PTK2B, E2F7, E2F8, SEMA3E, CCBE1, ANGPT1, ESM1, THBS1, ADGRA2	1283	25	16792	5.23523	0.213276	0.0119222	0.106367
GO:0007165~signal transduction	125	0.0570542	6.65154e-05	DLC1, CRABP1, FGF14, PGF, IQGAP3, PLPPR4, FGF13, PLPPR3, PRKG2, CXCL12, TNFSF18, ITPKA, STAC, ANK3, IL1B, PITPNC1, ADGRB1, CHRNA1, MAP2K6, NET1, IRS2, C5AR1, DEPDC1, IRS1, PLAUR, THBD, CAMK4, CD34, DLL4, PDE5A, ROR2, PLCXD3, ERBB3, NEDD9, CXXC5, ELK3, SOX9, ALCAM, VDR, RAC2, ADRA2A, RUNX1, GABRE, NTF3, GABRA5, TRIM55, LAT, PDE7B, CXCL14, HIVEP3, HIVEP1, PLAU, ACVRL1, CLDN4, SLC20A1, BCAM, RASSF8,…	1283	1161	16792	1.40914	0.244347	0.0132529	0.124224
GO:0007157~heterophilic cell-cell adhesion via plasma membrane cell adhesion molecules	14	0.00639007	6.91725e-05	CADM4, CADM1, NLGN1, CDH2, CDH4, TENM4, VCAM1, ALCAM, AMIGO2, FAT4, TENM2, TENM3, SMAGP, CD200	1283	50	16792	3.66466	0.252757	0.0131565	0.129183
GO:0008284~positive regulation of cell proliferation	60	0.027386	8.29438e-05	FGF5, PRC1, PGF, PDGFA, EDN1, TGFB2, IL31RA, WNT2, S1PR3, OSR2, GAB2, MYOCD, HSF4, PDGFD, SHC4, KIF14, IRS2, DLL1, IL24, IL6R, IRS1, PTHLH, VEGFD, EREG, ADM, HAS2, CTSH, CSF3, FGFR3, TBC1D8, CXCL5, TNC, FOXM1, PTH1R, ESM1, IL34, SOX9, ALDH3A1, RAC2, PTK2B, ADRA2A, THBS1, FN1, KLF5, NTF3, CDC20, IGF2, BIRC5, HGF, WWTR1, S100A13, PLAC8, ATF3, SFRP1, HBEGF, AREG, MAB21L1, BAMBI, HTR2B, ADRA1D	1283	466	16792	1.68516	0.294871	0.0150754	0.154883
GO:0008285~negative regulation of cell proliferation	53	0.024191	8.39713e-05	DLC1, DLEC1, RARRES1, ACVRL1, E2F7, GPLD1, TGFB3, CBFA2T3, TGFB2, WARS, MYOCD, IL1B, ADGRB1, RAPGEF2, CLMN, INCA1, DLL1, IL24, HMGA1, SLIT3, PTHLH, INHBA, MSX1, EREG, ADM, DLL4, RGCC, ROR2, ADAMTS1, WNT9A, PMP22, CXCL1, PODN, CYP1B1, ADORA2A, PTH1R, CXCL8, ZBTB16, VDR, CYP27B1, PTK2B, COL4A3, SMAD6, FZD5, CDKN3, SOD2, SFRP1, RPS6KA2, SFRP4, MYO16, IGFBP3, KLF4, RNF41	1283	396	16792	1.75169	0.297916	0.0146295	0.1568
GO:0030336~negative regulation of cell migration	20	0.00912867	8.70327e-05	DLC1, NOG, ACVRL1, CYP1B1, PODN, EPPK1, BST2, ABHD2, IL24, DACH1, TPM1, CITED2, SFRP1, SULF1, CX3CR1, SRGAP3, WNT11, STC1, IGFBP5, RNF41	1283	95	16792	2.75538	0.306912	0.0145569	0.162512
GO:0007062~sister chromatid cohesion	21	0.0095851	8.85093e-05	KIF22, NUF2, CENPF, BIRC5, NDC80, CDC20, AURKB, CENPK, CENPH, SPC24, KIF2C, CDCA8, MAD2L1, PLK1, CENPA, ZWINT, BUB1, BUB1B, SKA1, CDCA5, ERCC6L	1283	103	16792	2.66844	0.311209	0.0142368	0.165268
GO:0032870~cellular response to hormone stimulus	13	0.00593363	0.000100256	SOCS2, PGF, OXTR, ASNS, FOSB, SLIT3, FOS, HCRTR1, DUSP1, JUND, ADRA2A, CACNA1H, GHR	1283	45	16792	3.781	0.344462	0.015519	0.187182
GO:0051216~cartilage development	15	0.0068465	0.0001085	WNT5A, NOG, SMAD9, LUM, EDN1, PRRX1, ZBTB16, SOX6, SOX9, CSGALNACT1, SULF2, ITGB8, SULF1, BMP6, COL10A1	1283	59	16792	3.32748	0.366836	0.0161899	0.202559
GO:0007411~axon guidance	27	0.0123237	0.000174193	WNT5A, GDF7, EFNA3, CXCL12, CDH4, TGFB2, BDNF, ANK3, SEMA3C, ETV1, SEMA3B, BOC, TUBB3, MATN2, KLF7, NRXN3, DRAXIN, NTN4, NR4A3, PTPRO, NTN3, SLIT3, LAMA2, TENM2, ANOS1, SPTB, KIF26B	1283	159	16792	2.2225	0.519903	0.0249849	0.325013
GO:0043408~regulation of MAPK cascade	12	0.0054772	0.000183149	INHBB, INHBA, BMP1, INHBE, GDF7, REN, GDF6, GDF5, TGFB3, MYOC, BMP6, RNF41	1283	41	16792	3.83066	0.537678	0.0253886	0.341695
GO:0071300~cellular response to retinoic acid	16	0.00730293	0.000212521	MEF2C, MUC1, WNT5A, TNC, SOX9, FZD4, FZD7, WNT2, WNT7B, BRINP1, PTK2B, CYP26B1, WNT11, COL1A1, WNT9A, KLF4	1283	70	16792	2.99156	0.591487	0.0284655	0.396391
GO:0042493~response to drug	42	0.0191702	0.00025943	STAR, ASS1, ADORA2A, PGF, OXTR, PNP, TGFB2, ALDH3A1, FOS, DAB1, GATA6, PTK2B, JUND, SEMA3C, SRD5A2, LOX, THBS1, MAP2K6, SLC8A1, ACTC1, VAV3, TRPA1, EMX2, FZD1, CENPF, ITGA2, PDE3A, FOSB, GAL, RAD54L, KCNK3, SOD2, CCNB1, INHBA, AMH, CCND1, SFRP1, WFDC1, LRP8, COL1A1, HTR2B, ABCC6	1283	304	16792	1.80822	0.664744	0.0335753	0.483685
GO:0001666~response to hypoxia	28	0.0127801	0.000262811	ACVRL1, PGF, TGFB3, POSTN, CBFA2T3, CXCL12, TGFB2, ALDH3A1, CITED2, VCAM1, PKM, MYOCD, PTK2B, LIMD1, CASP1, THBS1, ANGPT2, ANGPTL4, KCNMA1, EGR1, MUC1, PLAT, ITGA2, SOD2, AJUBA, VEGFD, ADM, PLAU	1283	172	16792	2.13062	0.669486	0.0329922	0.489974
GO:0002576~platelet degranulation	20	0.00912867	0.000264763	RARRES2, A2M, PDGFA, TGFB3, SELENOP, IGF2, SERPING1, PCDH7, HGF, SPARC, TGFB2, ISLR, VEGFD, CLEC3B, PECAM1, ITIH4, ITIH3, THBS1, CFD, FN1	1283	103	16792	2.54137	0.672193	0.0322716	0.493604
GO:0043547~positive regulation of GTPase activity	67	0.030581	0.000338538	DLC1, FGF5, A2M, PDGFA, PREX1, PREX2, RASGEF1A, ARHGAP22, PTGIR, ARHGAP6, RAPGEF4, ANGPT1, DEPDC1B, ARHGAP8, RAPGEF2, NRG2, NET1, ARHGAP9, ARHGEF4, IRS2, ARHGAP28, DEPDC1, ARHGAP24, IRS1, ARHGAP26, PLCE1, RASGRF2, EREG, SRGAP3, RIN1, WNT11, SPATA13, SPTB, RALGPS2, FGFR3, RAP1GAP, ERBB3, CCL26, ALDH1A1, RGS11, RASGRP3, ARHGAP44, RASGRP1, RASGRP2, CAMK2B, RAP1GAP2, ARHGDIB, TBC1D2, VAV3, ARHGEF39, …	1283	565	16792	1.55204	0.759771	0.0399285	0.630734
GO:0050900~leukocyte migration	22	0.0100415	0.000348455	C3AR1, C5AR1, OLR1, PODXL, F2RL1, SLC3A2, SLC7A8, SLC7A5, MMP1, SLC7A11, THBD, ITGA6, PROCR, CD34, PECAM1, COL1A2, ANGPT1, COL1A1, SELPLG, ANGPT2, CEACAM1, FN1	1283	122	16792	2.36014	0.769603	0.0399562	0.649154
GO:0071277~cellular response to calcium ion	13	0.00593363	0.000361098	MEF2C, WNT5A, KCNH1, SYT1, EDN1, GPLD1, FOSB, FOS, RYR3, RASGRP2, JUND, CPNE3, CPNE2	1283	51	16792	3.33618	0.781555	0.0402803	0.672632
GO:0043524~negative regulation of neuron apoptotic process	23	0.010498	0.000406453	MEF2C, KIF14, NES, C5AR1, NTF3, STAR, GRIK2, ERBB3, ADORA2A, DRAXIN, GABRA5, GDF5, TGFB3, BIRC5, NR4A3, SOD2, BDNF, PTK2B, VSTM2L, NAIP, ANGPT1, ADAM8, NGF	1283	132	16792	2.2805	0.819555	0.0440611	0.756812
GO:0009612~response to mechanical stimulus	14	0.00639007	0.000414416	TNC, COL3A1, ASNS, POSTN, DCN, FOSB, CXCL12, CITED2, CCNB1, INHBB, PTK2B, JUND, THBS1, ANGPT2	1283	59	16792	3.10564	0.825509	0.0437789	0.771585
GO:0008015~blood circulation	12	0.0054772	0.000443558	COL4A3, C3AR1, ACVRL1, NFE2, TBC1D8, ADM, OLR1, ADORA2A, DLL4, ELN, SERPING1, CXCL12	1283	45	16792	3.49015	0.845673	0.0456426	0.825631
GO:0051056~regulation of small GTPase mediated signal transduction	23	0.010498	0.000503302	DLC1, ARHGEF4, A2M, VAV3, RAP1GAP, ARHGAP28, RACGAP1, ARHGAP24, ARHGAP26, ARHGAP22, ARHGAP6, SYDE2, RAC2, RASGRF2, ARHGAP44, SRGAP3, RHOBTB1, DEPDC1B, ARHGAP8, RAP1GAP2, ARHGDIB, NET1, ARHGAP9	1283	134	16792	2.24646	0.880021	0.0504035	0.936343
GO:0001958~endochondral ossification	9	0.0041079	0.000507638	CSGALNACT1, ALPL, MEF2C, FGFR3, COL13A1, MMP16, COL1A1, COL10A1, BMP6	1283	26	16792	4.53049	0.882194	0.049647	0.944374
GO:0002062~chondrocyte differentiation	11	0.00502077	0.000532114	MEF2C, FGFR3, OSR2, PTH1R, TGFBI, GDF5, GPLD1, SIX2, RUNX1, HMGA2, WNT2B	1283	39	16792	3.69151	0.893739	0.0508005	0.989693
GO:0022617~extracellular matrix disassembly	16	0.00730293	0.000543238	A2M, BMP1, FBN1, ELN, HSPG2, MMP16, CTSS, DCN, MMP3, MMP1, MMP10, LAMB3, FBN2, ADAM8, ADAMTS5, FN1	1283	76	16792	2.75538	0.898606	0.0506871	1.01028
GO:0045165~cell fate commitment	12	0.0054772	0.000543264	WNT5A, WNT2, WNT16, WNT7B, GDF7, GATA6, ROR2, WNT11, GAS1, WNT9A, GAP43, WNT2B	1283	46	16792	3.41428	0.898617	0.0495915	1.01033
GO:0051591~response to cAMP	12	0.0054772	0.000543264	FOS, THBD, DUSP1, PTK2B, REN, JUND, PDE3A, COL1A1, AREG, FOSB, SPARC, ALDH3A1	1283	46	16792	3.41428	0.898617	0.0495915	1.01033
GO:0008283~cell proliferation	47	0.0214524	0.000564326	BCAT1, CXCL1, FGF5, TSPAN1, NDP, E2F8, ELN, ENPEP, AURKB, CBFA2T3, MCM10, ISG20, TGFB2, CITED2, KIF2C, TGFBI, CREG1, BUB1, LMNTD1, COL4A3, IRS2, NOX5, MKI67, BST2, DLGAP5, KIF15, PIM1, TPX2, SIX2, CENPF, ITGA2, DACH1, CDC25C, CSGALNACT1, VEGFD, GLUL, UHRF1, PLCE1, TACSTD2, PLK1, CD34, LIPG, ADRA1B, BUB1B, FOXC1, AREG, ADRA1D	1283	366	16792	1.68071	0.907228	0.0503742	1.04931
GO:0008584~male gonad development	18	0.0082158	0.000692098	WNT5A, NUDT1, STAR, FSTL3, HMGA2, SOX9, CITED2, TGFB2, WNT2B, INHBA, NUPR1, SFRP1, GATA6, REN, SOX15, MAMLD1, SRD5A2, TFAP2C	1283	94	16792	2.50623	0.945857	0.0601596	1.28543
GO:0010759~positive regulation of macrophage chemotaxis	6	0.0027386	0.000804691	C3AR1, RARRES2, C5AR1, CMKLR1, THBS1, TNFSF18	1283	11	16792	7.13895	0.966316	0.0682028	1.49307
GO:0007275~multicellular organism development	61	0.0278424	0.000889746	PRR15, CRABP1, LMO2, MITF, MOV10L1, SPRY4, WNT2, LBH, CREG1, SPRED3, CREB3L1, PDGFD, BST2, BST1, OTX1, CHST2, PIM1, DLL1, HMGA2, GRHL1, THEG, TXNDC2, RELT, ROR2, WNT11, WNT9A, GADD45B, CSF3, WNT5A, TNFRSF6B, WNT16, PAQR8, SOX6, PAQR5, IGSF10, SPATA9, FAT3, DAZL, LIMD1, ASF1B, MN1, ARHGDIB, BMP1, NFE2, IGF2, DACH1, CSRP2, FZD4, WNT2B, DKK2, WNT7B, ID2, SFRP1, EBF4, DBP, SFRP4, ADRA1B, HIVEP3, KCTD…	1283	521	16792	1.53238	0.976465	0.0736618	1.64965
GO:0001503~ossification	16	0.00730293	0.000952113	BMP1, GPLD1, FSTL3, MGP, IGF2, GPM6B, SPARC, SOX9, IGSF10, CLEC3B, RASSF2, FOXC1, STC1, ATP6V0A4, RUNX1, COL11A1	1283	80	16792	2.61761	0.981907	0.077109	1.76431
GO:0030501~positive regulation of bone mineralization	10	0.00456433	0.000981856	MEF2C, SLC8A1, ADRB2, OSR2, KL, FAM20C, TGFB3, GPM6B, FBN2, BMP6	1283	35	16792	3.73945	0.984039	0.0779258	1.81894
GO:0000281~mitotic cytokinesis	9	0.0041079	0.00113544	KIF4A, CENPA, PLK1, ANK3, NUSAP1, ANLN, CEP55, RACGAP1, KIF20A	1283	29	16792	4.06182	0.991647	0.0879158	2.10062
GO:0007189~adenylate cyclase-activating G-protein coupled receptor signaling pathway	12	0.0054772	0.00114781	PTHLH, ADRB2, PTGIR, PTGER3, ADCY7, ADORA2A, GPR26, PTH1R, GPR78, ADM2, NPR3, GPR3	1283	50	16792	3.14114	0.992072	0.0872297	2.12328
GO:0006813~potassium ion transport	16	0.00730293	0.001239	KCNH1, KCNMA1, KCNJ15, KCNMB4, KCND3, KCNB2, KCNA3, KCNJ2, GJA5, KCNK3, KCNMB2, ABCC9, KCNJ6, SLC24A3, KCNJ8, KCNG1	1283	82	16792	2.55377	0.994603	0.0921733	2.29011
GO:0030212~hyaluronan metabolic process	6	0.0027386	0.00129305	MKI67, ITIH4, PIM1, ITIH5, ITIH3, HGF	1283	12	16792	6.54404	0.995703	0.0943369	2.38887
GO:0016477~cell migration	26	0.0118673	0.00136912	TSPAN1, RASGEF1A, CDH2, ENPEP, SDC2, TGFB2, SORBS2, GPC6, STRIP2, LIMD1, DEPDC1B, THBS1, CEACAM1, FMNL3, ADGRE2, FSCN2, PODXL, PSG2, SIX2, COL5A1, CARMIL2, CARMIL1, FOXE1, FOXC1, BAMBI, SPATA13	1283	172	16792	1.97843	0.996882	0.0979159	2.52772
GO:0060070~canonical Wnt signaling pathway	16	0.00730293	0.00140771	WNT5A, FZD8, TCF7, NDP, FZD1, FZD5, FZD4, FZD7, WNT2B, WNT2, WNT7B, CCND1, SFRP1, WNT11, WNT9A, KLF4	1283	83	16792	2.523	0.997351	0.0988611	2.59809
GO:0030449~regulation of complement activation	9	0.0041079	0.00144598	C3AR1, C5AR1, C1QBP, CD59, CFH, SUSD4, VTN, CFI, C2	1283	30	16792	3.92642	0.997746	0.099751	2.66782
GO:0007162~negative regulation of cell adhesion	10	0.00456433	0.00150649	SEMA5A, LPXN, ACVRL1, DAB1, ERBB3, PODXL, TNC, TGFBI, ANGPT1, ARHGDIB	1283	37	16792	3.53732	0.998253	0.102039	2.77798
GO:0032496~response to lipopolysaccharide	25	0.0114108	0.00153774	ALPL, TNFRSF6B, CXCL1, TNFRSF21, C5AR1, CXCL5, EDN1, PTPN22, CXCL6, SPARC, DCN, PCK2, SOD2, VCAM1, FOS, PTGIR, THBD, CYP27B1, RELT, ADM, KCNJ8, FMO1, REN, JUND, CASP1	1283	164	16792	1.99513	0.998469	0.102402	2.83483
GO:0001556~oocyte maturation	7	0.00319503	0.00163109	CCNB1, EREG, RPS6KA2, PTK2B, DAZL, PDE3A, TRIP13	1283	18	16792	5.08981	0.998967	0.106597	3.00444
GO:0071356~cellular response to tumor necrosis factor	19	0.00867224	0.00163155	ZFP36, TNFRSF21, ASS1, EDN1, CXCL8, POSTN, RORA, PCK2, BRCA1, DCSTAMP, CCL26, VCAM1, CCL11, MAP3K5, SFRP1, HAS2, COL1A1, THBS1, KLF2	1283	110	16792	2.26067	0.998969	0.104999	3.00527
GO:0045893~positive regulation of transcription, DNA-templated	59	0.0269296	0.00181111	MEF2C, ACVRL1, GDF7, GDF6, MITF, TGFB3, FOXO1, RORA, CITED2, IL31RA, FOS, OSR2, LBH, MYOCD, GATA6, IL1B, MYB, CCNA2, EGR1, KDM7A, EGR2, HMGA2, HMGA1, DDIT3, INHBA, CAMK4, MLLT11, ZNF711, ROR2, FOXC1, WNT11, COL1A1, WNT5A, GLIS2, FOXM1, NDP, ELK3, ZBTB16, SOX9, LYL1, ARNTL2, RUNX1, KLF5, KLF7, NFE2, FZD1, FZD4, BRCA1, FZD7, CDKN1C, ATF4, ID2, SFRP1, FOXE1, HIVEP3, AIRE, KLF2, BAMBI, KLF4	1283	515	16792	1.49941	0.999517	0.114139	3.33074
GO:0034765~regulation of ion transmembrane transport	19	0.00867224	0.00181154	KCNH1, KCNMA1, KCNJ15, KCND3, SCN1A, KCNK15, KCNB2, KCNB1, KCNA3, TPCN1, KCNQ5, TMEM37, KCNJ6, CLIC3, KCNJ8, CACNA1G, SCN9A, CACNA1H, NALCN	1283	111	16792	2.2403	0.999518	0.112485	3.33153
GO:0043303~mast cell degranulation	6	0.0027386	0.00196983	LAT, RASGRP1, MILR1, NR4A3, PLA2G3, S100A13	1283	13	16792	6.04065	0.999753	0.119945	3.61758
GO:0006954~inflammatory response	46	0.0209959	0.00205548	CXCL1, TNFRSF6B, C3AR1, TNFRSF21, RARRES2, TSPAN2, CXCL5, ADORA2A, TACR1, F2RL1, PTGS1, CXCL8, GPR68, CXCL6, IL34, CXCL12, CCL26, IL37, FOS, S1PR3, PTGIR, SEMA7A, CYP26B1, SCN9A, IL1B, NRROS, ADAM8, THBS1, IRAK2, PLP1, C5AR1, PTGER3, ADGRE2, OLR1, CHST2, IL24, GAL, AIM2, CCL11, LAT, CAMK4, RELT, NAIP, PLA2G4C, THEMIS2, BMP6	1283	379	16792	1.58853	0.999828	0.123056	3.77204
GO:0006935~chemotaxis	20	0.00912867	0.00222239	CXCL1, C3AR1, RARRES2, C5AR1, CXCL5, CMKLR1, CXCL8, ACKR3, CXCL6, CXCL12, CCL26, PLAUR, CCL11, RAC2, CXCL14, CXCL16, CX3CR1, ANOS1, SERPIND1, PLAU	1283	122	16792	2.14559	0.999915	0.130526	4.07234
GO:0032332~positive regulation of chondrocyte differentiation	7	0.00319503	0.00223139	ACVRL1, GDF6, GDF5, SOX6, ZBTB16, SOX9, BMP6	1283	19	16792	4.82192	0.999918	0.129223	4.08851
GO:0051965~positive regulation of synapse assembly	13	0.00593363	0.00225573	CLSTN2, SYNDIG1, NRXN3, NLGN1, OXTR, NLGN3, AMIGO2, BDNF, LRRTM2, ADGRB1, THBS2, SLITRK5, ADGRB2	1283	62	16792	2.74427	0.999926	0.128774	4.13224
GO:0031100~organ regeneration	11	0.00502077	0.00248032	PKM, C5AR1, ADM, MKI67, PGF, NR4A3, HGF, ANGPT2, CXCL12, CCNA2, ANXA3	1283	47	16792	3.06317	0.999971	0.138801	4.53468
GO:0051781~positive regulation of cell division	11	0.00502077	0.00248032	FGF5, VEGFD, EREG, PDGFA, PGF, TGFB3, IL1B, IGF2, PDGFD, HTR2B, TGFB2	1283	47	16792	3.06317	0.999971	0.138801	4.53468
GO:0048843~negative regulation of axon extension involved in axon guidance	8	0.00365147	0.00268919	SEMA5A, WNT5A, SEMA7A, SEMA3E, SEMA3D, SEMA3C, SEMA3B, SEMA4A	1283	26	16792	4.0271	0.999988	0.147641	4.90753
GO:0001558~regulation of cell growth	15	0.0068465	0.00273793	KIF14, SOCS2, FOXM1, ESM1, IL17RB, PLCE1, FAM107A, MELTF, FBLN5, RASGRP2, WFDC1, IGFBP3, CEACAM1, IGFBP5, NET1	1283	80	16792	2.45401	0.99999	0.148187	4.99433
GO:0010862~positive regulation of pathway-restricted SMAD protein phosphorylation	11	0.00502077	0.00292272	INHBB, INHBA, ACVRL1, BMP1, INHBE, GDF7, GDF6, GDF5, TGFB3, TGFB2, BMP6	1283	48	16792	2.99935	0.999996	0.155393	5.32277
GO:0050680~negative regulation of epithelial cell proliferation	12	0.0054772	0.00300397	CDKN1C, WNT5A, MEF2C, MTSS1, EREG, SFRP1, EPPK1, GDF5, WFDC1, KRT4, SOX9, TGFB2	1283	56	16792	2.80459	0.999997	0.157381	5.46685
GO:0032835~glomerulus development	5	0.00228217	0.00311852	PLCE1, HEYL, ENPEP, WWTR1, PTPRO	1283	9	16792	7.27115	0.999998	0.160887	5.66961
GO:0010907~positive regulation of glucose metabolic process	5	0.00228217	0.00311852	SLC45A3, IRS2, GPLD1, PMAIP1, IRS1	1283	9	16792	7.27115	0.999998	0.160887	5.66961
GO:0035987~endodermal cell differentiation	8	0.00365147	0.00339466	INHBA, COL4A2, LAMB3, COL12A1, VTN, HMGA2, COL11A1, FN1	1283	27	16792	3.87795	0.999999	0.171763	6.1567
GO:0051384~response to glucocorticoid	13	0.00593363	0.00340492	ALPL, IL1RN, SPARC, ANXA3, ALDH3A1, WNT7B, HNMT, PTGDS, ADM, DUSP1, AREG, GHR, BMP6	1283	65	16792	2.61761	0.999999	0.170201	6.17475
GO:0050919~negative chemotaxis	9	0.0041079	0.00341476	SEMA5A, PDGFA, SEMA7A, SEMA3E, SEMA3D, SEMA3C, SEMA3B, SEMA4A, SLIT3	1283	34	16792	3.46449	0.999999	0.168657	6.19205
GO:0035914~skeletal muscle cell differentiation	11	0.00502077	0.00342584	KLF5, MEF2C, EGR1, FOS, ATF3, ANKRD33, EGR2, NUPR1, HEYL, HIVEP3, CITED2	1283	49	16792	2.93814	0.999999	0.167205	6.21155
GO:0045599~negative regulation of fat cell differentiation	10	0.00456433	0.00382591	WNT5A, JDP2, FOXO1, TRIB3, ZFPM2, RORA, WWTR1, DDIT3, TRIB2, SOD2	1283	42	16792	3.11621	1	0.182758	6.91263
GO:0035902~response to immobilization stress	7	0.00319503	0.00391136	FOS, SLC8A1, HNMT, PTK2B, REN, GAL, SOD2	1283	21	16792	4.36269	1	0.184366	7.06173
GO:0050930~induction of positive chemotaxis	6	0.0027386	0.00404121	VEGFD, IL16, NTF3, PGF, CXCL8, CXCL12	1283	15	16792	5.23523	1	0.187794	7.28788
GO:2000310~regulation of N-methyl-D-aspartate selective glutamate receptor activity	6	0.0027386	0.00404121	MEF2C, CNIH2, PTK2B, NLGN1, NLGN3, DAPK1	1283	15	16792	5.23523	1	0.187794	7.28788
GO:0040007~growth	8	0.00365147	0.00423272	INHBB, INHBA, CCNB2, GDF7, GDF6, GDF5, SELENOP, BMP6	1283	28	16792	3.73945	1	0.193663	7.62045
GO:0018146~keratan sulfate biosynthetic process	8	0.00365147	0.00423272	FMOD, OGN, OMD, LUM, B3GNT7, CHST2, B4GALT4, PRELP	1283	28	16792	3.73945	1	0.193663	7.62045
GO:0043406~positive regulation of MAP kinase activity	12	0.0054772	0.00457839	AJUBA, MEF2C, DIRAS2, PDGFA, RASGRP1, EDN1, PDE5A, ADRA2A, TPD52L1, PDGFD, PIK3R6, HTR2B	1283	59	16792	2.66198	1	0.205546	8.21787
GO:0030509~BMP signaling pathway	14	0.00639007	0.00467729	EGR1, NOG, SMAD9, BMP1, ACVRL1, GDF7, GDF6, SMAD6, FSTL1, GREM2, RGMA, ROR2, TMEM100, BMP6	1283	76	16792	2.41096	1	0.207305	8.38812
GO:2001214~positive regulation of vasculogenesis	5	0.00228217	0.00488532	ADM, CD34, TMEM100, RAPGEF2, CEACAM1	1283	10	16792	6.54404	1	0.213257	8.74528
GO:0090023~positive regulation of neutrophil chemotaxis	7	0.00319503	0.00503579	CXCL1, C3AR1, C5AR1, C1QBP, RAC2, CXCL8, DAPK2	1283	22	16792	4.16439	1	0.21684	9.00279
GO:0043434~response to peptide hormone	10	0.00456433	0.00530247	STC2, EREG, JUND, OXTR, COL1A1, SRD5A2, AREG, SPARC, CXCL12, IRS1	1283	44	16792	2.97456	1	0.224673	9.45748
GO:0001822~kidney development	15	0.0068465	0.00538032	ASS1, FSTL3, SIX2, CENPF, DCN, TGFB2, CDKN1C, SULF2, KCNJ8, REN, SULF1, PCSK9, ADAMTS1, HAS2, BMP6	1283	86	16792	2.2828	1	0.225328	9.58981
GO:0030182~neuron differentiation	16	0.00730293	0.00542019	WNT5A, MEF2C, FZD8, WNT16, TRPC6, EMX2, FZD1, FZD5, FZD4, FZD7, WNT2B, WNT2, WNT7B, PCSK9, WNT11, WNT9A	1283	95	16792	2.20431	1	0.224583	9.65751
GO:0006940~regulation of smooth muscle contraction	6	0.0027386	0.00551297	ADRB2, PLCE1, KCNB2, CHRM2, ADRA2A, CNN1	1283	16	16792	4.90803	1	0.225763	9.81487
GO:2000311~regulation of alpha-amino-3-hydroxy-5-methyl-4-isoxazole propionate selective glutamate receptor activity	6	0.0027386	0.00551297	MEF2C, CNIH2, CNIH3, CACNG7, NLGN1, CACNG4	1283	16	16792	4.90803	1	0.225763	9.81487
GO:0001938~positive regulation of endothelial cell proliferation	13	0.00593363	0.00562634	SEMA5A, WNT5A, WNT2, CCL11, EGR3, VEGFD, ACVRL1, PGF, F3, HTR2B, CXCL12, CCL26, BMP6	1283	69	16792	2.46587	1	0.227649	10.0068
GO:0045666~positive regulation of neuron differentiation	14	0.00639007	0.00586403	MEF2C, TRPC6, GDF7, GDF6, GDF5, GDPD5, GPRC5B, NRCAM, NBL1, BRINP1, DAB1, CDON, HEYL, BMP6	1283	78	16792	2.34914	1	0.233841	10.4079
GO:0071456~cellular response to hypoxia	16	0.00730293	0.00598266	VASN, SLC8A1, STC2, TRPC6, EDN1, RORA, PMAIP1, KCNK3, CCNB1, PTGIS, SFRP1, GATA6, RGCC, STC1, ADAM8, CCNA2	1283	96	16792	2.18135	1	0.235764	10.6075
GO:0090090~negative regulation of canonical Wnt signaling pathway	23	0.010498	0.00636124	WNT5A, EGR1, NOG, DRAXIN, FZD1, FOXO1, NOTUM, BICC1, CDH2, SOX9, ANKRD6, WWTR1, PTPRO, DDIT3, DKK2, DACT1, DKK1, SFRP1, PRICKLE1, SFRP4, ROR2, LIMD1, WNT11	1283	163	16792	1.84678	1	0.246433	11.2416
GO:0060325~face morphogenesis	8	0.00365147	0.0063663	NOG, MSX1, DKK1, CRISPLD1, CRISPLD2, TGFB3, COL1A1, TGFB2	1283	30	16792	3.49015	1	0.244378	11.25
GO:0044344~cellular response to fibroblast growth factor stimulus	8	0.00365147	0.0063663	ZFP36, EGR3, SFRP1, STAR, DLL4, CXCL8, POSTN, COL1A1	1283	30	16792	3.49015	1	0.244378	11.25
GO:0071773~cellular response to BMP stimulus	8	0.00365147	0.0063663	SMAD9, ACVRL1, SFRP1, SPINT2, GATA6, HEYL, TMEM100, BMP6	1283	30	16792	3.49015	1	0.244378	11.25
GO:0042981~regulation of apoptotic process	28	0.0127801	0.00639958	STEAP3, EGR1, TNFRSF21, OLFM4, BMP1, NTF3, GDF7, GDF6, GDF5, MITF, TGFB3, BIRC5, GAS1, PMAIP1, DAPK2, SOX9, BRCA1, DAPK1, INHBB, CASP10, RELT, DUSP1, INHBE, ROBO4, CASP1, IGFBP3, BMP6, HIP1	1283	213	16792	1.7205	1	0.243294	11.3056
GO:0051301~cell division	41	0.0187138	0.00673939	KIFC1, NEK2, NEDD9, PTTG1, SPC24, KIF2C, CDCA8, NCAPH, HMCN1, FIGN, NCAPG, BUB1, SKA3, PARD3B, SKA1, CCNA2, CDCA5, CDCA3, ERCC6L, KIF14, NUF2, TPX2, CENPF, KIF18B, NDC80, CDC20, BIRC5, UBE2C, CDC25C, HMGA2, WEE1, CCNB1, PLK5, CCND1, CCNB2, MAD2L1, SPAG5, ZWINT, BUB1B, HAUS7, CENPX	1283	350	16792	1.53317	1	0.252213	11.8707
GO:0019933~cAMP-mediated signaling	9	0.0041079	0.00701135	ADM, ADCY7, ADGRG6, PDE3A, RAPGEF4, NPR3, RAPGEF2, SOX9, GAL	1283	38	16792	3.09981	1	0.258701	12.3205
GO:0010595~positive regulation of endothelial cell migration	10	0.00456433	0.00718529	WNT5A, PTK2B, EDN1, CCBE1, GPLD1, ANGPT1, SPARC, THBS1, ADGRA2, ANXA3	1283	46	16792	2.84523	1	0.261945	12.6071
GO:0007517~muscle organ development	15	0.0068465	0.00731662	MEF2C, EGR3, USP2, FHL1, CENPF, SOX6, LAMA2, MSX1, SMTN, TAGLN, SGCD, HBEGF, ETV1, CACNA1H, MKX	1283	89	16792	2.20586	1	0.263795	12.8229
GO:0071310~cellular response to organic substance	6	0.0027386	0.00732594	CD68, EGR2, CLEC3B, IQGAP3, IL1B, CASP1	1283	17	16792	4.61932	1	0.261867	12.8381
GO:0032964~collagen biosynthetic process	4	0.00182573	0.00744924	TRAM2, COL1A1, SERPINH1, COL5A1	1283	6	16792	8.72538	1	0.263439	13.0402
GO:0009611~response to wounding	12	0.0054772	0.00762354	ZFP36, GFAP, ADM, SULF2, PDGFA, TNC, CX3CR1, ITGB4, ABHD2, GAP43, FN1, TGFB2	1283	63	16792	2.49297	1	0.266506	13.3252
GO:0007422~peripheral nervous system development	7	0.00319503	0.00796738	EGR3, EGR2, ERBB3, PMP22, ADGRB1, CITED2, ADGRB2	1283	24	16792	3.81736	1	0.274494	13.8846
GO:0045600~positive regulation of fat cell differentiation	10	0.00456433	0.00829963	KLF5, ZFP36, ADIRF, WDFY2, MEDAG, RARRES2, ID2, SFRP1, CMKLR1, ZBTB16	1283	47	16792	2.7847	1	0.281916	14.422
GO:0048468~cell development	9	0.0041079	0.00963175	INHBB, INHBA, BMP1, INHBE, GDF7, GATA6, GDF6, GDF5, HSF4	1283	40	16792	2.94482	1	0.316813	16.5448
GO:0060326~cell chemotaxis	12	0.0054772	0.00964328	SEMA5A, CXCL1, VCAM1, C3AR1, C5AR1, CXCL5, CXCL14, HBEGF, CXCL6, HGF, CXCL12, DOCK4	1283	65	16792	2.41626	1	0.31471	16.563
GO:0014068~positive regulation of phosphatidylinositol 3-kinase signaling	12	0.0054772	0.00964328	CSF3, WNT16, PDGFA, ERBB3, F2RL1, ANGPT1, PDGFD, DCN, HGF, SOX9, MYOC, TGFB2	1283	65	16792	2.41626	1	0.31471	16.563
GO:0046330~positive regulation of JNK cascade	12	0.0054772	0.00964328	MAP3K5, WNT16, PTK2B, RASGRP1, RASSF2, F2RL1, IL1B, TNFRSF19, TPD52L1, GADD45B, ANKRD6, FZD7	1283	65	16792	2.41626	1	0.31471	16.563
GO:0000188~inactivation of MAPK activity	7	0.00319503	0.00981966	DUSP4, DUSP2, DUSP1, RGS3, RGS4, DUSP8, DUSP7	1283	25	16792	3.66466	1	0.317047	16.8402
GO:0042340~keratan sulfate catabolic process	5	0.00228217	0.0101791	FMOD, OGN, OMD, LUM, PRELP	1283	12	16792	5.45336	1	0.324138	17.4026
GO:0043116~negative regulation of vascular permeability	5	0.00228217	0.0101791	ADM, ADORA2A, ANGPT1, PDE3A, CEACAM1	1283	12	16792	5.45336	1	0.324138	17.4026
GO:0001706~endoderm formation	5	0.00228217	0.0101791	DUSP4, NOG, DUSP2, DKK1, DUSP1	1283	12	16792	5.45336	1	0.324138	17.4026
GO:0036499~PERK-mediated unfolded protein response	5	0.00228217	0.0101791	ATF4, ATF3, CXCL8, ASNS, DDIT3	1283	12	16792	5.45336	1	0.324138	17.4026
GO:0019221~cytokine-mediated signaling pathway	19	0.00867224	0.0107033	CSF3, ASPN, PODNL1, PODN, SOCS2, IL6R, DCN, LRRC15, GREM2, IL37, IL31RA, IL17RB, IL20RB, EREG, F3, IL1B, LRP8, GHR, IL13RA2	1283	131	16792	1.89827	1	0.335245	18.2161
GO:0000122~negative regulation of transcription from RNA polymerase II promoter	73	0.0333196	0.0107202	MEF2C, RITA1, NOG, JDP2, BACH2, THRB, E2F7, E2F8, MITF, EDN1, PRRX1, FOXO1, AURKB, PAWR, CITED2, OSR2, MYOCD, GATA6, SOX15, HSF4, MYB, EGR1, ZFP36, FOSB, HMGA2, PKIA, DDIT3, CCND1, UHRF1, DACT1, MSX1, C1QBP, DLL4, ZFPM2, TFAP2C, USP2, GLIS2, FOXM1, TRIB3, NFIX, SOX6, ZBTB16, CXXC5, TAGLN3, NPAS1, VDR, ANKRD33, JUND, HOXA7, KLF5, FZD8, TCF7, TRIM29, LMCD1, NR4A3, DACH1, WWTR1, PPP1R13L, AJUBA, CDK…	1283	720	16792	1.32699	1	0.333244	18.2422
GO:0051897~positive regulation of protein kinase B signaling	14	0.00639007	0.0109116	CSF3, PDGFA, IGF2, SEMA5A, C1QBP, HPSE, F3, HBEGF, ANGPT1, THBS1, ADAM8, MYOC, IGFBP5, HIP1	1283	84	16792	2.18135	1	0.335657	18.5373
GO:0008652~cellular amino acid biosynthetic process	7	0.00319503	0.0119588	BCAT1, CBSL, PYCR1, NAALAD2, GLUL, ASNS, CBS	1283	26	16792	3.52371	1	0.358861	20.134
GO:0045944~positive regulation of transcription from RNA polymerase II promoter	95	0.0433612	0.0120579	MEF2C, NOG, ACVRL1, LMO2, THRB, E2F7, E2F8, F2RL1, MITF, EDN1, FSTL3, PRRX1, TGFB3, FOXO1, RORA, CITED4, CITED2, WNT2, FOS, OSR2, MYOCD, GATA6, SOX15, CREB3L1, IL1B, HSF4, MYB, TOP2A, EGR1, EGR2, OTX1, SIX2, DLL1, FOSB, GAL, HMGA2, GRHL1, HMGA1, DDIT3, INHBA, ADRB2, UHRF1, MSX1, RGCC, ZFPM2, FOXC1, TFAP2C, SLC40A1, FHOD1, CSF3, WNT5A, ABLIM3, GLIS2, FOXM1, LUM, NFIX, DCN, IL33, ELK3, SOX6, SOX9, …	1283	981	16792	1.26745	1	0.358738	20.2836
GO:0051968~positive regulation of synaptic transmission, glutamatergic	6	0.0027386	0.012118	GLUL, ADORA2A, PTK2B, NLGN1, OXTR, NLGN3	1283	19	16792	4.13308	1	0.357698	20.3742
GO:0048251~elastic fiber assembly	4	0.00182573	0.0123004	TNXB, FBLN5, LOX, MFAP4	1283	7	16792	7.4789	1	0.359534	20.6484
GO:0033622~integrin activation	4	0.00182573	0.0123004	FERMT3, FERMT2, COL16A1, FN1	1283	7	16792	7.4789	1	0.359534	20.6484
GO:0001649~osteoblast differentiation	16	0.00730293	0.0123666	ALPL, MEF2C, NOG, TNC, WWTR1, SFRP1, SEMA7A, RRAS2, CREB3L1, WNT11, COL1A1, TMSB4Y, IGFBP3, MYOC, IGFBP5, BMP6	1283	104	16792	2.01355	1	0.358649	20.7478
GO:0043588~skin development	8	0.00365147	0.0128894	FRAS1, ITGA6, PDGFA, COL3A1, ITGB4, ADAMTS2, SLITRK5, COL5A1	1283	34	16792	3.07955	1	0.368202	21.5281
GO:0043065~positive regulation of apoptotic process	35	0.0159752	0.0132911	PNMA2, CYP1B1, TGFB3, GPLD1, FOXO1, PAWR, ZBTB16, PMAIP1, MAP3K5, TOP2A, MAP2K6, NET1, KCNMA1, ARHGEF4, VAV3, GAL, NTSR1, HMGA2, IFIT2, ATF4, ITGA6, RASGRF2, SFRP1, C1QBP, ADM, DUSP1, NUPR1, RPS6KA2, SFRP4, RASSF2, MLLT11, WNT11, GADD45B, IGFBP3, NGF	1283	300	16792	1.52694	1	0.374776	22.1227
GO:0006955~immune response	46	0.0209959	0.0136259	CSF3, CXCL1, TNFRSF6B, TNFRSF21, IL1R1, IL16, CXCL5, JCHAIN, CXCL8, VTN, C1R, CXCL6, HLA-DMA, PNP, CXCL12, CCL26, IL37, SEMA7A, IL4R, IL1B, NRROS, SEMA3C, CD22, THBS1, SBSPON, IL18R1, TCF7, C5AR1, CMKLR1, CEBPG, SMAD6, IL1RN, IL24, CTSS, TINAGL1, AIM2, HLA-F, CCL11, LAT, BPI, C1QBP, CXCL14, RELT, AIRE, IFI6, BMP6	1283	421	16792	1.43005	1	0.379715	22.615
GO:0015804~neutral amino acid transport	5	0.00228217	0.0138277	SLC7A8, SLC3A2, SLC6A15, SLC38A1, SLC7A5	1283	13	16792	5.03387	1	0.381667	22.9104
GO:0042127~regulation of cell proliferation	24	0.0109544	0.013972	KCNH1, TNFRSF6B, TNFRSF21, TCF7, ERBB3, NUAK1, FOXM1, TNC, PTGS1, JAG2, TGFB3, CHEK1, CXCL6, SOX9, BRCA1, MELTF, RELT, PTK2B, IL4R, JUND, CHST11, TFAP2C, RAPGEF2, PLAU	1283	185	16792	1.69791	1	0.382349	23.1209
GO:0042476~odontogenesis	7	0.00319503	0.0144057	MYO5A, INHBA, OSR2, TUFT1, TGFB3, COL1A2, TGFB2	1283	27	16792	3.3932	1	0.38914	23.7503
GO:0060349~bone morphogenesis	7	0.00319503	0.0144057	DHRS3, MSX1, FGFR3, OSR2, CYP26B1, HAS2, CITED2	1283	27	16792	3.3932	1	0.38914	23.7503
GO:0014065~phosphatidylinositol 3-kinase signaling	7	0.00319503	0.0144057	C1QBP, ERBB3, EDN1, PREX2, PIK3R6, HTR2B, IRS1	1283	27	16792	3.3932	1	0.38914	23.7503
GO:0030155~regulation of cell adhesion	9	0.0041079	0.014838	LAMA2, KIF14, NUAK1, PTK2B, PKP4, JAG2, CXCL8, DLL1, SOX9	1283	43	16792	2.73936	1	0.395726	24.3729
GO:0045785~positive regulation of cell adhesion	9	0.0041079	0.014838	VAV3, C1QBP, SAA1, ITGA2, ANGPT1, ADAM8, CXCL12, TPM1, TNFSF18	1283	43	16792	2.73936	1	0.395726	24.3729
GO:0048565~digestive tract development	8	0.00365147	0.0150778	CCNB1, ITGA6, MYOCD, FAT4, COL3A1, TGFB3, ITGB4, OXTR	1283	35	16792	2.99156	1	0.398223	24.7161
GO:0046697~decidualization	6	0.0027386	0.0151626	VDR, PTGIS, CYP27B1, STC2, STC1, CITED2	1283	20	16792	3.92642	1	0.397535	24.8372
GO:0042474~middle ear morphogenesis	6	0.0027386	0.0151626	NOG, MSX1, OSR2, EDN1, PRRX1, SIX2	1283	20	16792	3.92642	1	0.397535	24.8372
GO:0031572~G2 DNA damage checkpoint	6	0.0027386	0.0151626	CLSPN, PLK5, DTL, PLK1, CHEK1, BRCA1	1283	20	16792	3.92642	1	0.397535	24.8372
GO:0000187~activation of MAPK activity	16	0.00730293	0.0158091	WNT5A, IRAK2, C5AR1, NTF3, TGFB3, IQGAP3, LPAR3, HGF, GRM4, PLCE1, SAA1, IL1B, THBS1, MAP2K6, DUSP7, GHR	1283	107	16792	1.9571	1	0.408074	25.7538
GO:0035556~intracellular signal transduction	44	0.0200831	0.0160591	CXCL1, ADCY7, PLEK2, TUFT1, NUAK1, PREX1, PREX2, EDN1, CXCL8, PLCL1, RGS11, STAC, WNK4, DGKG, GUCY1A2, PLCD4, DCLK2, SH2B3, DEPDC1B, RAPGEF2, NRG2, NET1, SHC4, ARHGEF4, ZFP36, SOCS2, PRKCH, DEPDC1, RACGAP1, DAPK2, MARK1, DAPK1, SH3BP5, TRAF3IP2, ASB9, LAT, DUSP1, CAMK4, RPS6KA2, ADRA1B, CIT, PLA2G4C, UNC13A, IGFBP5	1283	403	16792	1.42897	1	0.410573	26.1055
GO:0000086~G2/M transition of mitotic cell cycle	19	0.00867224	0.0165058	NES, SDCCAG8, NEK2, FOXM1, TPX2, CHEK1, BIRC5, TPD52L1, CDC25C, WEE1, HMMR, AJUBA, OFD1, CCNB1, CCNB2, PLK1, HAUS7, CIT, PHLDA1	1283	137	16792	1.81513	1	0.416815	26.7298
GO:0044691~tooth eruption	3	0.0013693	0.0165854	FAM20A, COL1A1, ADAMTS5	1283	3	16792	13.0881	1	0.415931	26.8406
GO:0035583~sequestering of TGFbeta in extracellular matrix	3	0.0013693	0.0165854	LTBP1, FBN1, FBN2	1283	3	16792	13.0881	1	0.415931	26.8406
GO:0019343~cysteine biosynthetic process via cystathionine	3	0.0013693	0.0165854	CBSL, CTH, CBS	1283	3	16792	13.0881	1	0.415931	26.8406
GO:0019228~neuronal action potential	7	0.00319503	0.0171801	KCNMB4, SCN1A, GRIK2, ANK3, SCN9A, CHRNA1, KCNMB2	1283	28	16792	3.27202	1	0.424759	27.663
GO:0086010~membrane depolarization during action potential	7	0.00319503	0.0171801	SCN1A, SCN3B, CACNA1G, SCN9A, CACNA1H, NALCN, TPCN1	1283	28	16792	3.27202	1	0.424759	27.663
GO:0032461~positive regulation of protein oligomerization	5	0.00228217	0.0182096	JCHAIN, PMAIP1, MMP3, MMP1, AIM2	1283	14	16792	4.67431	1	0.44122	29.0659
GO:0010812~negative regulation of cell-substrate adhesion	5	0.00228217	0.0182096	COL1A1, ANGPT2, PTPRO, FZD4, FZD7	1283	14	16792	4.67431	1	0.44122	29.0659
GO:0010001~glial cell differentiation	5	0.00228217	0.0182096	FGF5, DNER, CDH2, GAP43, MMP24	1283	14	16792	4.67431	1	0.44122	29.0659
GO:0000902~cell morphogenesis	11	0.00502077	0.0182895	TENM4, VDR, MSX1, TENM3, SOX6, HGF, KLF2, ADAM8, PTPRO, TGFB2, FRY	1283	62	16792	2.32208	1	0.440221	29.1737
GO:0061180~mammary gland epithelium development	4	0.00182573	0.0185745	WNT2, ORAI1, WNT7B, MSX1	1283	8	16792	6.54404	1	0.442879	29.5568
GO:0050848~regulation of calcium-mediated signaling	4	0.00182573	0.0185745	CMKLR1, PTK2B, TMEM100, GBP1	1283	8	16792	6.54404	1	0.442879	29.5568
GO:0050966~detection of mechanical stimulus involved in sensory perception of pain	4	0.00182573	0.0185745	SCN1A, TRPA1, ITGA2, ASIC3	1283	8	16792	6.54404	1	0.442879	29.5568
GO:0009629~response to gravity	4	0.00182573	0.0185745	PKM, FOS, STX1A, SPARC	1283	8	16792	6.54404	1	0.442879	29.5568
GO:0051983~regulation of chromosome segregation	4	0.00182573	0.0185745	KIF2C, MKI67, BUB1, AURKB	1283	8	16792	6.54404	1	0.442879	29.5568
GO:0035249~synaptic transmission, glutamatergic	6	0.0027386	0.0186787	SLC1A4, CNIH2, ADORA2A, CNIH3, GRIK2, UNC13A	1283	21	16792	3.73945	1	0.442315	29.6965
GO:0045987~positive regulation of smooth muscle contraction	6	0.0027386	0.0186787	MYOCD, TACR1, EDN1, ADRA1B, ITGA2, ADRA1D	1283	21	16792	3.73945	1	0.442315	29.6965
GO:0097150~neuronal stem cell population maintenance	6	0.0027386	0.0186787	FANCD2, PRRX1, FOXO1, DLL1, CDH2, MMP24	1283	21	16792	3.73945	1	0.442315	29.6965
GO:0032147~activation of protein kinase activity	9	0.0041079	0.0192852	KIF14, CLSPN, RGCC, ADRA2A, TPX2, FGF13, WNT11, GPRC5B, TGFB2	1283	45	16792	2.61761	1	0.450478	30.5041
GO:0060048~cardiac muscle contraction	9	0.0041079	0.0192852	TNNT2, SLC8A1, ACTC1, MYL3, SCN3B, GAA, TPM1, PPP1R13L, MAP2K6	1283	45	16792	2.61761	1	0.450478	30.5041
GO:0043410~positive regulation of MAPK cascade	13	0.00593363	0.019533	TNFRSF6B, FGFR3, PDGFA, IGF2, CDH2, IL6R, GRM4, ADRB2, RELT, CDON, ADRA1B, BANK1, IGFBP3	1283	81	16792	2.10056	1	0.45233	30.8315
GO:0007018~microtubule-based movement	13	0.00593363	0.019533	KIF14, KIFC1, KIF22, KIF2C, KIF4A, DNAH12, KIF15, KIF18B, RACGAP1, KIF21B, KIF26B, KIF20A, NGF	1283	81	16792	2.10056	1	0.45233	30.8315
GO:0007080~mitotic metaphase plate congression	8	0.00365147	0.0202236	KIF14, CCNB1, KIFC1, KIF22, KIF2C, CDCA8, CEP55, CDCA5	1283	37	16792	2.82985	1	0.461571	31.7362
GO:0048813~dendrite morphogenesis	8	0.00365147	0.0202236	FMN1, KLF7, MAP2, PREX2, MAP6, SLITRK5, SDC2, VLDLR	1283	37	16792	2.82985	1	0.461571	31.7362
GO:0030036~actin cytoskeleton organization	18	0.0082158	0.0202586	DLC1, CXCL1, MTSS1, FMNL3, TNXB, PLEK2, FSCN2, PDGFA, ABLIM3, CORO6, DAAM1, ITPKA, DAAM2, ARHGAP26, CORO2B, RAC2, TMSB15A, ADRA2A	1283	130	16792	1.81219	1	0.459766	31.7818
GO:0060412~ventricular septum morphogenesis	7	0.00319503	0.0203006	NOG, HEYL, ZFPM2, WNT11, GJA5, TGFB2, CITED2	1283	29	16792	3.15919	1	0.458097	31.8365
GO:0003151~outflow tract morphogenesis	9	0.0041079	0.0218326	MEF2C, DHRS3, NOG, HEYL, FZD1, SEMA3C, WNT11, GJA5, CITED2	1283	46	16792	2.56071	1	0.480439	33.801
GO:0055074~calcium ion homeostasis	6	0.0027386	0.0226913	SLC8A1, CYP27B1, JPH2, FAM20A, KL, TMTC2	1283	22	16792	3.56947	1	0.491384	34.8785
GO:0008037~cell recognition	6	0.0027386	0.0226913	CSGALNACT1, CADM4, CADM1, PECAM1, SMAGP, CD200	1283	22	16792	3.56947	1	0.491384	34.8785
GO:0001502~cartilage condensation	6	0.0027386	0.0226913	BMP1, ROR2, MGP, SOX9, COL11A1, TGFB2	1283	22	16792	3.56947	1	0.491384	34.8785
GO:0010811~positive regulation of cell-substrate adhesion	8	0.00365147	0.023207	COL26A1, ITGA6, FBLN2, CCDC80, VTN, ECM2, VIT, ABI3BP	1283	38	16792	2.75538	1	0.496819	35.5177
GO:0001953~negative regulation of cell-matrix adhesion	5	0.00228217	0.0233618	SEMA3E, HOXA7, POSTN, THBS1, MYOC	1283	15	16792	4.36269	1	0.496752	35.7084
GO:0033627~cell adhesion mediated by integrin	5	0.00228217	0.0233618	ITGA6, FBN1, ITGA2, VTN, COL16A1	1283	15	16792	4.36269	1	0.496752	35.7084
GO:0048706~embryonic skeletal system development	7	0.00319503	0.0237842	WNT5A, NOG, SULF2, SULF1, KIAA1217, WNT11, COL1A1	1283	30	16792	3.05388	1	0.500651	36.2261
GO:0030334~regulation of cell migration	12	0.0054772	0.0241719	LAMA2, AJUBA, KIF14, MMP10, PLXNC1, PECAM1, ROBO4, JAG2, TMSB4Y, SPATA13, CEACAM1, PHLDA2	1283	74	16792	2.12239	1	0.503964	36.6976
GO:0008217~regulation of blood pressure	11	0.00502077	0.0248037	ACVRL1, CORIN, CD34, ACTA2, REN, EDN1, PTGS1, COL1A2, DLL1, NPR3, SOD2	1283	65	16792	2.2149	1	0.51071	37.4591
GO:0043627~response to estrogen	11	0.00502077	0.0248037	CCND1, CYP27B1, STAR, GATA6, IL4R, SMAD6, TGFB3, GAL, CITED4, BRCA1, CITED2	1283	65	16792	2.2149	1	0.51071	37.4591
GO:0035988~chondrocyte proliferation	4	0.00182573	0.0263024	FGFR3, STC1, MMP16, HMGA2	1283	9	16792	5.81692	1	0.529275	39.2311
GO:0035313~wound healing, spreading of epidermal cells	4	0.00182573	0.0263024	AJUBA, ACVRL1, HBEGF, COL5A1	1283	9	16792	5.81692	1	0.529275	39.2311
GO:0003094~glomerular filtration	4	0.00182573	0.0263024	SULF2, CD34, SULF1, JCHAIN	1283	9	16792	5.81692	1	0.529275	39.2311
GO:0007204~positive regulation of cytosolic calcium ion concentration	18	0.0082158	0.0264173	MCHR1, C3AR1, PTGER3, C5AR1, TRPC6, PTH1R, EDN1, F2RL1, LPAR3, OXTR, S1PR3, PLCE1, PTGIR, ADM, SAA1, PTK2B, ADRA1B, ADRA1D	1283	134	16792	1.7581	1	0.52847	39.365
GO:0032570~response to progesterone	8	0.00365147	0.0264802	FOS, CLDN4, TGFB3, OXTR, ABHD2, FOSB, THBS1, TGFB2	1283	39	16792	2.68473	1	0.526969	39.4381
GO:0007200~phospholipase C-activating G-protein coupled receptor signaling pathway	11	0.00502077	0.027305	GPR84, C3AR1, PLCE1, PTGER3, C5AR1, TACR1, PTH1R, ADRA1B, NPR3, HTR2B, ADRA1D	1283	66	16792	2.18135	1	0.535669	40.3898
GO:0030032~lamellipodium assembly	7	0.00319503	0.0276463	AJUBA, ARHGEF4, VAV3, CARMIL1, ABLIM3, PTPRO, SPATA13	1283	31	16792	2.95537	1	0.537822	40.7794
GO:0000165~MAPK cascade	30	0.013693	0.0278183	MEF2C, FGF5, FGFR3, PDGFA, ERBB3, RASGEF1A, FGF13, IL31RA, MAP3K5, RASGRP3, PTK2B, RASGRP1, IL1B, ANGPT1, CAMK2B, RAPGEF2, NRG2, MAP2K6, ZFP36, IRS2, KL, IRS1, LAT, RASGRF2, EREG, GFRA1, HBEGF, DUSP7, IL3RA, SPTB	1283	262	16792	1.49863	1	0.537742	40.9749
GO:0030324~lung development	12	0.0054772	0.0288647	WNT5A, WNT2, WNT7B, CRISPLD2, CCBE1, AARD, HSD11B1, FSTL3, ZFPM2, LOX, SPARC, ADAMTS2	1283	76	16792	2.06654	1	0.548833	42.1508
GO:0086002~cardiac muscle cell action potential involved in contraction	5	0.00228217	0.0293114	SCN1A, SCN3B, CACNA1G, KCNJ2, CACNA1D	1283	16	16792	4.09002	1	0.552123	42.646
GO:0032924~activin receptor signaling pathway	5	0.00228217	0.0293114	INHBB, INHBA, ACVRL1, GDF7, GDF6	1283	16	16792	4.09002	1	0.552123	42.646
GO:0003203~endocardial cushion morphogenesis	5	0.00228217	0.0293114	NOG, ACVRL1, HEYL, SOX9, TGFB2	1283	16	16792	4.09002	1	0.552123	42.646
GO:0061036~positive regulation of cartilage development	5	0.00228217	0.0293114	WNT5A, BMP1, SOX6, ZBTB16, SOX9	1283	16	16792	4.09002	1	0.552123	42.646
GO:0014002~astrocyte development	5	0.00228217	0.0293114	GFAP, PLP1, TSPAN2, VIM, DLL1	1283	16	16792	4.09002	1	0.552123	42.646
GO:0045956~positive regulation of calcium ion-dependent exocytosis	5	0.00228217	0.0293114	SYT1, STX1A, KCNB1, CACNA1G, SYT7	1283	16	16792	4.09002	1	0.552123	42.646
GO:0046426~negative regulation of JAK-STAT cascade	8	0.00365147	0.0300541	ASPN, PODN, PODNL1, DAB1, SOCS2, DCN, HMGA2, LRRC15	1283	40	16792	2.61761	1	0.558976	43.4606
GO:0030326~embryonic limb morphogenesis	8	0.00365147	0.0300541	FRAS1, DKK1, CYP26B1, GDF5, PRRX1, FBN2, GJA5, TGFB2	1283	40	16792	2.61761	1	0.558976	43.4606
GO:0043010~camera-type eye development	8	0.00365147	0.0300541	CDKN1C, GPD2, EFEMP1, FBN1, FOXC1, HSF4, FBN2, MAB21L1	1283	40	16792	2.61761	1	0.558976	43.4606
GO:0019344~cysteine biosynthetic process	3	0.0013693	0.0314962	CBSL, CTH, CBS	1283	4	16792	9.81606	1	0.573925	45.0109
GO:0061333~renal tubule morphogenesis	3	0.0013693	0.0314962	MEF2C, MTSS1, COL4A1	1283	4	16792	9.81606	1	0.573925	45.0109
GO:0010701~positive regulation of norepinephrine secretion	3	0.0013693	0.0314962	STX1A, KCNB1, OXTR	1283	4	16792	9.81606	1	0.573925	45.0109
GO:0048570~notochord morphogenesis	3	0.0013693	0.0314962	WNT5A, NOG, WNT11	1283	4	16792	9.81606	1	0.573925	45.0109
GO:0070814~hydrogen sulfide biosynthetic process	3	0.0013693	0.0314962	CBSL, CTH, CBS	1283	4	16792	9.81606	1	0.573925	45.0109
GO:0061304~retinal blood vessel morphogenesis	3	0.0013693	0.0314962	COL4A1, CYP1B1, FZD4	1283	4	16792	9.81606	1	0.573925	45.0109
GO:0007399~nervous system development	32	0.0146059	0.0316863	CXCL1, MEF2C, FGF5, NOG, FGF14, SCN3B, NDP, GLIS2, GPM6B, FGF13, SLC7A5, SEMA5A, FOS, BDNF, APBA2, GLRB, NTF3, STMN3, NLGN1, INSC, GAL, ARHGAP26, CSGALNACT1, NBL1, INHBA, HES4, CHRM2, GFRA1, NAIP, NRGN, INTU, VLDLR	1283	287	16792	1.4593	1	0.573855	45.2123
GO:0010629~negative regulation of gene expression	18	0.0082158	0.031887	MEF2C, XDH, ACVRL1, STC2, IQGAP3, PTPN22, CITED2, TGFB2, SLIT3, CCNB1, C1QTNF3, ID2, SFRP1, ITGB8, CD34, DLL4, KLF4, PC	1283	137	16792	1.7196	1	0.573908	45.4241
GO:1900026~positive regulation of substrate adhesion-dependent cell spreading	7	0.00319503	0.0319005	OLFM4, C1QBP, PREX1, CARMIL1, HAS2, MYOC, NET1	1283	32	16792	2.86302	1	0.571801	45.4384
GO:0007093~mitotic cell cycle checkpoint	7	0.00319503	0.0319005	MAD2L1, PLK2, ZWINT, BUB1, BUB1B, CHEK1, WNT9A	1283	32	16792	2.86302	1	0.571801	45.4384
GO:0070371~ERK1 and ERK2 cascade	6	0.0027386	0.0322892	CCL11, IQGAP3, OXTR, HTR2B, SOX9, CTSH	1283	24	16792	3.27202	1	0.574024	45.8462
GO:0048041~focal adhesion assembly	6	0.0027386	0.0322892	AJUBA, DLC1, ARHGAP6, PTK2B, FERMT2, ITGA2	1283	24	16792	3.27202	1	0.574024	45.8462
GO:0007059~chromosome segregation	11	0.00502077	0.0328372	HJURP, NEK2, SPAG5, NUF2, CENPF, SKA3, NDC80, SKA1, TOP2A, BRCA1, ESCO2	1283	68	16792	2.11719	1	0.57801	46.4165
GO:0048839~inner ear development	8	0.00365147	0.0339387	C1QTNF5, CXCL14, TGFB3, PLPPR4, DLL1, SPARC, TGFB2, LIN7A	1283	41	16792	2.55377	1	0.588019	47.5454
GO:0014066~regulation of phosphatidylinositol 3-kinase signaling	12	0.0054772	0.0341768	FGF5, IRS2, FGFR3, EREG, PDGFA, KL, ERBB3, RASGRP1, HBEGF, IRS1, NRG2, CEACAM1	1283	78	16792	2.01355	1	0.588398	47.7865
GO:0003149~membranous septum morphogenesis	4	0.00182573	0.0354812	NOG, ID2, FZD1, TGFB2	1283	10	16792	5.23523	1	0.60014	49.0886
GO:0040037~negative regulation of fibroblast growth factor receptor signaling pathway	4	0.00182573	0.0354812	WNT5A, SULF2, SULF1, THBS1	1283	10	16792	5.23523	1	0.60014	49.0886
GO:0007019~microtubule depolymerization	4	0.00182573	0.0354812	KIF14, KIF2C, STMN3, KIF18B	1283	10	16792	5.23523	1	0.60014	49.0886
GO:0061564~axon development	4	0.00182573	0.0354812	PLP1, TSPAN2, NEFM, GAP43	1283	10	16792	5.23523	1	0.60014	49.0886
GO:0031589~cell-substrate adhesion	5	0.00228217	0.0360761	ITGA6, SMAD6, MYO1G, ITGA2, ANGPT1	1283	17	16792	3.84943	1	0.604148	49.6723
GO:0070509~calcium ion import	5	0.00228217	0.0360761	ORAI1, SLC8A1, CACNA1G, CACNA1H, CACNA1D	1283	17	16792	3.84943	1	0.604148	49.6723
GO:0035567~non-canonical Wnt signaling pathway	5	0.00228217	0.0360761	WNT5A, FZD8, SFRP4, FZD1, FZD5	1283	17	16792	3.84943	1	0.604148	49.6723
GO:0051497~negative regulation of stress fiber assembly	5	0.00228217	0.0360761	DLC1, ARHGAP6, TACSTD2, ARHGAP28, MYOC	1283	17	16792	3.84943	1	0.604148	49.6723
GO:0032331~negative regulation of chondrocyte differentiation	5	0.00228217	0.0360761	PTHLH, GDF5, EFEMP1, WNT9A, SOX9	1283	17	16792	3.84943	1	0.604148	49.6723
GO:0050808~synapse organization	7	0.00319503	0.0365587	MYO5A, WNT7B, LRRTM2, DRP2, SEMA3E, NLGN1, NLGN3	1283	33	16792	2.77626	1	0.606925	50.141
GO:0071526~semaphorin-plexin signaling pathway	7	0.00319503	0.0365587	SEMA5A, SEMA7A, SEMA3E, SEMA3D, SEMA3C, SEMA3B, SEMA4A	1283	33	16792	2.77626	1	0.606925	50.141
GO:0048661~positive regulation of smooth muscle cell proliferation	10	0.00456433	0.0372878	ID2, EREG, EDN1, AKR1B1, HBEGF, ITGA2, PDGFD, IL6R, NR4A3, THBS1	1283	60	16792	2.18135	1	0.612134	50.8414
GO:0071158~positive regulation of cell cycle arrest	6	0.0027386	0.0379066	ID2, GATA6, FAP, RGCC, HMGA2, BRCA1	1283	25	16792	3.14114	1	0.616131	51.4285
GO:0051496~positive regulation of stress fiber assembly	8	0.00365147	0.0381428	SFRP1, CARMIL1, RGCC, TGFB3, WNT11, TPM1, MYOC, FHOD1	1283	42	16792	2.49297	1	0.616304	51.6509
GO:0007269~neurotransmitter secretion	9	0.0041079	0.0381702	GRM4, SYT1, TSPOAP1, STX1A, NRXN3, BAIAP3, PTPRN2, UNC13A, LIN7A	1283	51	16792	2.30966	1	0.61443	51.6766
GO:0042542~response to hydrogen peroxide	9	0.0041079	0.0381702	SLC8A1, DUSP1, STAR, PTK2B, TRPA1, COL1A1, NR4A3, AREG, SOD2	1283	51	16792	2.30966	1	0.61443	51.6766
GO:0007416~synapse assembly	10	0.00456433	0.0408982	WNT5A, NRCAM, BDNF, NRXN3, DNER, FZD1, NLGN1, SDK1, NLGN3, FZD5	1283	61	16792	2.14559	1	0.638205	54.1746
GO:0001523~retinoid metabolic process	10	0.00456433	0.0408982	ALDH1A1, RDH10, DHRS3, RARRES2, GPC6, HSPG2, LRP8, ABCA4, SDC2, RDH5	1283	61	16792	2.14559	1	0.638205	54.1746
GO:0032092~positive regulation of protein binding	10	0.00456433	0.0408982	WNT5A, CSF3, EPHB6, DACT1, PLK2, TRIB3, VTN, BAMBI, RAPGEF2, LFNG	1283	61	16792	2.14559	1	0.638205	54.1746
GO:0001837~epithelial to mesenchymal transition	7	0.00319503	0.0416307	WNT5A, NOG, WNT11, HGF, HMGA2, SOX9, TGFB2	1283	34	16792	2.6946	1	0.642753	54.8242
GO:0030282~bone mineralization	7	0.00319503	0.0416307	ASPN, FGFR3, CYP27B1, CLEC3B, TUFT1, PTH1R, WNT11	1283	34	16792	2.6946	1	0.642753	54.8242
GO:0007596~blood coagulation	22	0.0100415	0.0416754	PLAT, NFE2, ADORA2A, ENPP4, F2RL1, ITGA2, PLAUR, THBD, PROCR, GATA6, F3, CD59, CARMIL1, COL1A2, SH2B3, ZFPM2, COL1A1, SERPIND1, PDGFD, PLAU, EHD3, RAB27A	1283	184	16792	1.56488	1	0.641048	54.8635
GO:0006508~proteolysis	50	0.0228217	0.0422448	OVCH1, OVCH2, MMP27, ANPEP, MMP3, MMP1, MMP24, FAP, CFI, ADAM8, CFD, CASP1, LONRF2, NRIP3, CLCA2, COLEC10, MMP16, ESPL1, CTSS, MMP10, NAALAD2, ADAMTS1, ADAM12, CTSH, ADAMTS5, CTSF, ADAMTS14, KEL, ADAMTSL5, C1R, C1S, CPZ, REN, PRSS3, ADAM33, ADAMTS10, C2, RHBDF2, PLAT, ADAM28, CPA4, BMP1, OLR1, HGF, XPNPEP2, CASP10, SFRP1, MMP23B, LRP8, PLAU	1283	500	16792	1.30881	1	0.644052	55.3621
GO:0070098~chemokine-mediated signaling pathway	11	0.00502077	0.0425367	CCL11, CXCL1, CXCL5, CMKLR1, PTK2B, CX3CR1, CXCL8, ACKR3, CXCL6, CXCL12, CCL26	1283	71	16792	2.02773	1	0.644556	55.6156
GO:0010596~negative regulation of endothelial cell migration	5	0.00228217	0.0436647	ACVRL1, DLL4, STC1, DCN, THBS1	1283	18	16792	3.63558	1	0.652319	56.5826
GO:0045216~cell-cell junction organization	5	0.00228217	0.0436647	OCLN, LIMS2, CLDN6, TGFB3, TGFB2	1283	18	16792	3.63558	1	0.652319	56.5826
GO:0045840~positive regulation of mitotic nuclear division	6	0.0027386	0.0440846	EREG, RGCC, EDN1, NUSAP1, IL1B, IGF2	1283	26	16792	3.02032	1	0.653857	56.9375
GO:0072661~protein targeting to plasma membrane	6	0.0027386	0.0440846	PALM, KCNB2, ANK3, KCNB1, PRKG2, EHD3	1283	26	16792	3.02032	1	0.653857	56.9375
GO:0002053~positive regulation of mesenchymal cell proliferation	6	0.0027386	0.0440846	WNT5A, WNT2, IRS2, PDGFA, PRRX1, SOX9	1283	26	16792	3.02032	1	0.653857	56.9375
GO:0007268~chemical synaptic transmission	27	0.0123237	0.0446337	MYO5A, SYT1, KCNMB4, GRIK2, TACR1, LPAR3, GABBR2, KCNMB2, HCRTR1, KCNQ5, APBA2, PLP1, GLRB, DLGAP1, MPZ, GABRA5, GRIA4, NTSR1, KCNK3, GRM4, PDE7B, GRIA1, CACNA1G, PMP22, HTR2B, SLITRK5, UNC13A	1283	240	16792	1.47241	1	0.656461	57.3974
GO:0007166~cell surface receptor signaling pathway	30	0.013693	0.045902	ADGRA3, MCHR1, IL1R1, TSPAN1, TSPAN2, ADGRD1, TACR1, PTH1R, EDN1, OXTR, PTK2B, CDA, ADGRB1, ADGRB2, COL4A3, ADGRE2, TRPA1, ADGRG6, TSPAN13, TSPAN15, CLEC1A, INHBA, CASP10, ADRB2, TACSTD2, CD59, CD82, GFRA1, ADGRL2, ADGRA2	1283	274	16792	1.433	1	0.664947	58.442
GO:0030278~regulation of ossification	4	0.00182573	0.0460802	DHRS3, EGR2, SIX2, INTU	1283	11	16792	4.7593	1	0.664382	58.5868
GO:0048333~mesodermal cell differentiation	4	0.00182573	0.0460802	INHBA, ITGB4, ITGA2, HMGA2	1283	11	16792	4.7593	1	0.664382	58.5868
GO:0048703~embryonic viscerocranium morphogenesis	4	0.00182573	0.0460802	MEF2C, RDH10, CHST11, MTHFD1L	1283	11	16792	4.7593	1	0.664382	58.5868
GO:1901653~cellular response to peptide	4	0.00182573	0.0460802	KLF5, AKR1B1, KLF2, KLF4	1283	11	16792	4.7593	1	0.664382	58.5868
GO:0000082~G1/S transition of mitotic cell cycle	14	0.00639007	0.0465047	BCAT1, IQGAP3, GPR132, POLA2, CDKN3, MCM10, INHBA, CDC45, CCND1, PLK2, POLE2, RRM2, CDCA5, ORC1	1283	102	16792	1.7964	1	0.665814	58.9298
GO:0006865~amino acid transport	7	0.00319503	0.0471244	SLC1A4, SLC7A8, SLC3A2, SLC6A15, SLC38A1, SLC7A5, SLC7A11	1283	35	16792	2.61761	1	0.668784	59.4258
GO:0050918~positive chemotaxis	7	0.00319503	0.0471244	SEMA5A, VEGFD, NTF3, SAA1, ANGPT1, HGF, CXCL12	1283	35	16792	2.61761	1	0.668784	59.4258
GO:0016055~Wnt signaling pathway	22	0.0100415	0.0481973	WNT5A, WNT16, TCF7, DRAXIN, NDP, FERMT2, NOTUM, FZD4, AMOTL2, DDIT3, MARK1, CPZ, WNT2B, DKK2, WNT2, RSPO4, WNT7B, DACT1, KREMEN1, ZBED3, WNT11, WNT9A	1283	187	16792	1.53977	1	0.675237	60.271
GO:0006260~DNA replication	19	0.00867224	0.0488247	EXO1, CLSPN, GINS2, TICRR, DTL, GINS4, NFIX, CHEK1, POLA2, CDC25C, MCM10, RNASEH2A, BRCA1, CDC45, POLE2, RRM2, ORC1, FEN1, NFIA	1283	155	16792	1.60434	1	0.67811	60.7575
GO:0060718~chorionic trophoblast cell differentiation	3	0.0013693	0.0498613	E2F7, E2F8, FZD5	1283	5	16792	7.85284	1	0.68401	61.5491
GO:1900747~negative regulation of vascular endothelial growth factor signaling pathway	3	0.0013693	0.0498613	XDH, DCN, ADGRA2	1283	5	16792	7.85284	1	0.68401	61.5491
GO:0033591~response to L-ascorbic acid	3	0.0013693	0.0498613	ITGA2, SPARC, SOD2	1283	5	16792	7.85284	1	0.68401	61.5491
GO:0035860~glial cell-derived neurotrophic factor receptor signaling pathway	3	0.0013693	0.0498613	SULF2, SULF1, GFRA1	1283	5	16792	7.85284	1	0.68401	61.5491
GO:2000809~positive regulation of synaptic vesicle clustering	3	0.0013693	0.0498613	NLGN1, NLGN3, CDH2	1283	5	16792	7.85284	1	0.68401	61.5491
GO:0045578~negative regulation of B cell differentiation	3	0.0013693	0.0498613	INHBA, ID2, SFRP1	1283	5	16792	7.85284	1	0.68401	61.5491
GO:0040020~regulation of meiotic nuclear division	3	0.0013693	0.0498613	PDE3A, CDC20, GPR3	1283	5	16792	7.85284	1	0.68401	61.5491
GO:0000727~double-strand break repair via break-induced replication	3	0.0013693	0.0498613	GINS2, CDC45, GINS4	1283	5	16792	7.85284	1	0.68401	61.5491
GO:0071504~cellular response to heparin	3	0.0013693	0.0498613	EGR1, SFRP1, SOX9	1283	5	16792	7.85284	1	0.68401	61.5491
GO:0090131~mesenchyme migration	3	0.0013693	0.0498613	ACTG2, ACTC1, ACTA2	1283	5	16792	7.85284	1	0.68401	61.5491
GO:0042262~DNA protection	3	0.0013693	0.0498613	CBSL, NUDT1, CBS	1283	5	16792	7.85284	1	0.68401	61.5491
GO:0019346~transsulfuration	3	0.0013693	0.0498613	CBSL, CTH, CBS	1283	5	16792	7.85284	1	0.68401	61.5491
GO:0038031~non-canonical Wnt signaling pathway via JNK cascade	3	0.0013693	0.0498613	WNT5A, FZD7, MYOC	1283	5	16792	7.85284	1	0.68401	61.5491
GO:0035725~sodium ion transmembrane transport	11	0.00502077	0.0499899	SLC8A1, SCN1A, SLC20A1, SCN3B, SLC24A3, SLC3A2, SCN9A, ASIC3, NALCN, SLC4A4, SCNN1A	1283	73	16792	1.97218	1	0.683031	61.6462
GO:0045444~fat cell differentiation	11	0.00502077	0.0499899	INHBB, CCND1, EGR2, C1QTNF3, GDF6, SMAD6, LRRC8C, FOXO1, NR4A3, HMGA2, KLF4	1283	73	16792	1.97218	1	0.683031	61.6462
GO:0031069~hair follicle morphogenesis	6	0.0027386	0.0508298	FOXQ1, FOXE1, TGM3, INTU, TGFB2, IGFBP5	1283	27	16792	2.90846	1	0.687322	62.2749
GO:0048863~stem cell differentiation	6	0.0027386	0.0508298	A2M, MSX1, HOXA7, HMGA2, ETV4, SHC4	1283	27	16792	2.90846	1	0.687322	62.2749
GO:0071880~adenylate cyclase-activating adrenergic receptor signaling pathway	5	0.00228217	0.0520771	ADRB2, ADRA2A, ADRA1B, RAPGEF2, ADRA1D	1283	19	16792	3.44423	1	0.694441	63.1906
GO:0071363~cellular response to growth factor stimulus	8	0.00365147	0.0527445	PLK5, SFRP1, LRP8, CPNE3, SPARC, THBS1, ANGPT2, KLF4	1283	45	16792	2.32677	1	0.697278	63.6719
GO:0001755~neural crest cell migration	8	0.00365147	0.0527445	SEMA5A, SEMA7A, SEMA3E, SEMA3D, SEMA3C, SEMA3B, HTR2B, SEMA4A	1283	45	16792	2.32677	1	0.697278	63.6719
GO:0030514~negative regulation of BMP signaling pathway	8	0.00365147	0.0527445	WNT5A, NBL1, NOG, DKK1, SFRP1, SMAD6, FZD1, FSTL3	1283	45	16792	2.32677	1	0.697278	63.6719
GO:0030177~positive regulation of Wnt signaling pathway	7	0.00319503	0.0530457	RSPO4, DACT1, SULF2, SFRP1, SULF1, DEPDC1B, FZD4	1283	36	16792	2.5449	1	0.697505	63.8872
GO:0001889~liver development	11	0.00502077	0.054024	PKM, CADM1, ASS1, DBP, GATA6, CEBPG, PCSK9, ASNS, HGF, CITED2, SOD2	1283	74	16792	1.94552	1	0.702415	64.578
GO:0071498~cellular response to fluid shear stress	4	0.00182573	0.0580472	MEF2C, MTSS1, PTK2B, HAS2	1283	12	16792	4.36269	1	0.727016	67.2898
GO:0051310~metaphase plate congression	4	0.00182573	0.0580472	KIF22, KIF2C, CENPF, NDC80	1283	12	16792	4.36269	1	0.727016	67.2898
GO:1990440~positive regulation of transcription from RNA polymerase II promoter in response to endoplasmic reticulum stress	4	0.00182573	0.0580472	ATF4, ATF3, CREB3L1, DDIT3	1283	12	16792	4.36269	1	0.727016	67.2898
GO:0015807~L-amino acid transport	4	0.00182573	0.0580472	SLC7A8, SLC38A1, SLC7A4, SLC7A5	1283	12	16792	4.36269	1	0.727016	67.2898
GO:0022409~positive regulation of cell-cell adhesion	4	0.00182573	0.0580472	ITGA6, FSTL3, KIF26B, CITED2	1283	12	16792	4.36269	1	0.727016	67.2898
GO:0035413~positive regulation of catenin import into nucleus	4	0.00182573	0.0580472	SEMA5A, DACT1, SULF2, BAMBI	1283	12	16792	4.36269	1	0.727016	67.2898
GO:0043206~extracellular fibril organization	4	0.00182573	0.0580472	COL3A1, MFAP4, MFAP5, COL5A1	1283	12	16792	4.36269	1	0.727016	67.2898
GO:0048846~axon extension involved in axon guidance	4	0.00182573	0.0580472	ALCAM, FMOD, OGN, SLIT3	1283	12	16792	4.36269	1	0.727016	67.2898
GO:0051382~kinetochore assembly	4	0.00182573	0.0580472	CENPA, CENPF, CENPX, CENPH	1283	12	16792	4.36269	1	0.727016	67.2898
GO:0030195~negative regulation of blood coagulation	4	0.00182573	0.0580472	THBD, CD34, EDN1, VTN	1283	12	16792	4.36269	1	0.727016	67.2898
GO:0043032~positive regulation of macrophage activation	4	0.00182573	0.0580472	WNT5A, IL4R, IL33, THBS1	1283	12	16792	4.36269	1	0.727016	67.2898
GO:0031581~hemidesmosome assembly	4	0.00182573	0.0580472	COL17A1, LAMB3, ITGA6, ITGB4	1283	12	16792	4.36269	1	0.727016	67.2898
GO:0007188~adenylate cyclase-modulating G-protein coupled receptor signaling pathway	7	0.00319503	0.0593983	ADRB2, ADORA2A, CHRM2, PTH1R, ADRA1B, CACNA1D, ADRA1D	1283	37	16792	2.47612	1	0.733582	68.1555
GO:0048015~phosphatidylinositol-mediated signaling	14	0.00639007	0.0600308	KCNH1, FGF5, IRS2, FGFR3, ERBB3, PDGFA, KL, NPR3, IRS1, GAB2, EREG, HBEGF, NRG2, NGF	1283	106	16792	1.72861	1	0.735627	68.5533
GO:2000463~positive regulation of excitatory postsynaptic potential	5	0.00228217	0.0613057	STX1A, PTK2B, NLGN1, NLGN3, NETO1	1283	20	16792	3.27202	1	0.741448	69.3408
GO:0007094~mitotic spindle assembly checkpoint	5	0.00228217	0.0613057	MAD2L1, PLK1, BUB1, CENPF, BUB1B	1283	20	16792	3.27202	1	0.741448	69.3408
GO:0045664~regulation of neuron differentiation	5	0.00228217	0.0613057	NREP, NTF3, CDON, NLGN1, NGF	1283	20	16792	3.27202	1	0.741448	69.3408
GO:2000377~regulation of reactive oxygen species metabolic process	5	0.00228217	0.0613057	CYP1B1, PDK3, FOXM1, FOXO1, RNF41	1283	20	16792	3.27202	1	0.741448	69.3408
GO:0043066~negative regulation of apoptotic process	45	0.0205395	0.0622036	TNFRSF6B, WNT5A, LIMS2, FOXO1, ASNS, SOX9, TNFSF18, IL31RA, CITED2, GATA6, PTK2B, FCMR, CHST11, ANGPT1, THBS1, ANGPTL4, KIF14, EGR3, ACTC1, MPZ, SOCS2, SMAD6, PIM1, PDE3A, BIRC5, NTSR1, HMGA2, PLAUR, PLAC8, SOD2, AMIGO2, MSX1, MAD2L1, SFRP1, PLK2, DUSP1, PLK1, CD59, TNFAIP8, NAIP, WNT11, HTR2B, CTSH, SLC40A1, NGF	1283	455	16792	1.29442	1	0.744922	69.8842
GO:0030593~neutrophil chemotaxis	10	0.00456433	0.0624655	CCL11, VAV3, C5AR1, SAA1, PREX1, EDN1, CXCL8, IL1B, TGFB2, CCL26	1283	66	16792	1.98304	1	0.744678	70.041
GO:0002244~hematopoietic progenitor cell differentiation	10	0.00456433	0.0624655	INHBA, SFRP1, TMEM91, FSTL3, ANLN, TOP2A, SMPD3, ESCO2, CITED2, PTPRQ	1283	66	16792	1.98304	1	0.744678	70.041
GO:0060021~palate development	11	0.00502077	0.0627222	WNT5A, MEF2C, FRAS1, INHBA, DHRS3, MSX1, OSR2, PRRX1, TGFB3, WNT11, TGFB2	1283	76	16792	1.89433	1	0.744408	70.1939
GO:0007010~cytoskeleton organization	19	0.00867224	0.0659263	PALM, FMNL2, FMNL3, ABLIM3, NEDD9, SOX9, TPM1, MARK1, AJUBA, PAK6, CCL11, PLCE1, KRT15, STRIP2, LIMD1, KRT4, TUBB3, SPTB, HIP1	1283	161	16792	1.54456	1	0.760487	72.0415
GO:0048662~negative regulation of smooth muscle cell proliferation	6	0.0027386	0.0660292	OGN, PTGIR, NPR3, IGFBP3, KLF4, IGFBP5	1283	29	16792	2.70788	1	0.759339	72.099
GO:0043542~endothelial cell migration	6	0.0027386	0.0660292	CYP1B1, FAP, PECAM1, PRSS3, ADGRA2, S100A2	1283	29	16792	2.70788	1	0.759339	72.099
GO:0001937~negative regulation of endothelial cell proliferation	6	0.0027386	0.0660292	XDH, ACVRL1, RGCC, SULF1, SPARC, THBS1	1283	29	16792	2.70788	1	0.759339	72.099
GO:0001568~blood vessel development	7	0.00319503	0.0661842	MEF2C, COL1A2, FOXO1, COL1A1, RAPGEF2, CEACAM1, COL5A1	1283	38	16792	2.41096	1	0.758478	72.1854
GO:0070301~cellular response to hydrogen peroxide	9	0.0041079	0.0666108	MAP3K5, CYP1B1, TRPC6, AKR1B1, FOXO1, PDGFD, KLF2, KLF4, NET1	1283	57	16792	2.06654	1	0.759074	72.4219
GO:0032869~cellular response to insulin stimulus	11	0.00502077	0.067391	INHBB, MYO5A, IRS2, STAR, GPLD1, FOXO1, TRIB3, PCSK9, IRS1, CEACAM1, GHR	1283	77	16792	1.86972	1	0.761528	72.8495
GO:0070588~calcium ion transmembrane transport	15	0.0068465	0.0694453	ORAI1, SLC8A1, TRPC6, TRPV2, CACNG7, TRPA1, CACNG4, TMEM37, SLC24A3, ATP2A3, RYR3, CACNA1G, CACNA1H, NALCN, CACNA1D	1283	119	16792	1.64976	1	0.77045	73.9456
GO:0007409~axonogenesis	13	0.00593363	0.069544	NRCAM, OGN, FMOD, OMD, ANK3, LUM, PLPPR4, NTNG1, ADGRB1, ECM2, SLITRK5, SEMA4A, PRELP	1283	98	16792	1.73617	1	0.76931	73.9972
GO:0000910~cytokinesis	8	0.00365147	0.0704304	NOX5, PRC1, PLK1, KLHL13, BIRC5, ESPL1, CIT, KIF20A	1283	48	16792	2.18135	1	0.772119	74.4562
GO:0014037~Schwann cell differentiation	3	0.0013693	0.0710674	EGR2, ERBB3, ADGRG6	1283	6	16792	6.54404	1	0.773649	74.7813
GO:0086015~SA node cell action potential	3	0.0013693	0.0710674	SCN3B, CACNA1G, GJA5	1283	6	16792	6.54404	1	0.773649	74.7813
GO:0032873~negative regulation of stress-activated MAPK cascade	3	0.0013693	0.0710674	FOXM1, FOXO1, PBK	1283	6	16792	6.54404	1	0.773649	74.7813
GO:0048341~paraxial mesoderm formation	3	0.0013693	0.0710674	WNT5A, FOXC1, WNT11	1283	6	16792	6.54404	1	0.773649	74.7813
GO:0038063~collagen-activated tyrosine kinase receptor signaling pathway	3	0.0013693	0.0710674	COL4A3, COL4A2, COL4A1	1283	6	16792	6.54404	1	0.773649	74.7813
GO:0010564~regulation of cell cycle process	3	0.0013693	0.0710674	SFRP1, HMGA2, SOX9	1283	6	16792	6.54404	1	0.773649	74.7813
GO:0031536~positive regulation of exit from mitosis	3	0.0013693	0.0710674	BIRC5, UBE2C, CDCA5	1283	6	16792	6.54404	1	0.773649	74.7813
GO:0071286~cellular response to magnesium ion	3	0.0013693	0.0710674	ANK3, RYR3, FBP1	1283	6	16792	6.54404	1	0.773649	74.7813
GO:0035878~nail development	3	0.0013693	0.0710674	RSPO4, ITGA6, ITGB4	1283	6	16792	6.54404	1	0.773649	74.7813
GO:0045143~homologous chromosome segregation	3	0.0013693	0.0710674	PLK1, ESPL1, PTTG1	1283	6	16792	6.54404	1	0.773649	74.7813
GO:0010694~positive regulation of alkaline phosphatase activity	3	0.0013693	0.0710674	MEF2C, GPLD1, ITGA2	1283	6	16792	6.54404	1	0.773649	74.7813
GO:0032914~positive regulation of transforming growth factor beta1 production	3	0.0013693	0.0710674	LUM, SERPINB7, THBS1	1283	6	16792	6.54404	1	0.773649	74.7813
GO:0003158~endothelium development	3	0.0013693	0.0710674	CD34, SLC40A1, GJA5	1283	6	16792	6.54404	1	0.773649	74.7813
GO:0036003~positive regulation of transcription from RNA polymerase II promoter in response to stress	3	0.0013693	0.0710674	MUC1, ATF4, KLF2	1283	6	16792	6.54404	1	0.773649	74.7813
GO:0061037~negative regulation of cartilage development	3	0.0013693	0.0710674	NOG, WNT11, TGFB2	1283	6	16792	6.54404	1	0.773649	74.7813
GO:0042759~long-chain fatty acid biosynthetic process	3	0.0013693	0.0710674	MYO5A, PLP1, ELOVL6	1283	6	16792	6.54404	1	0.773649	74.7813
GO:0007600~sensory perception	4	0.00182573	0.0713131	NXNL2, ADORA2A, TRPV2, ASIC3	1283	13	16792	4.0271	1	0.773248	74.9057
GO:0060317~cardiac epithelial to mesenchymal transition	4	0.00182573	0.0713131	WNT2, WNT16, HEYL, TGFB2	1283	13	16792	4.0271	1	0.773248	74.9057
GO:0035810~positive regulation of urine volume	4	0.00182573	0.0713131	ADORA2A, EDN1, HAS2, NPR3	1283	13	16792	4.0271	1	0.773248	74.9057
GO:0006195~purine nucleotide catabolic process	4	0.00182573	0.0713131	XDH, NUDT1, NT5E, PNP	1283	13	16792	4.0271	1	0.773248	74.9057
GO:1900025~negative regulation of substrate adhesion-dependent cell spreading	4	0.00182573	0.0713131	MELTF, TACSTD2, POSTN, GBP1	1283	13	16792	4.0271	1	0.773248	74.9057
GO:0086012~membrane depolarization during cardiac muscle cell action potential	4	0.00182573	0.0713131	SLC8A1, SCN3B, KCNJ2, CACNA1D	1283	13	16792	4.0271	1	0.773248	74.9057
GO:0048872~homeostasis of number of cells	4	0.00182573	0.0713131	GCNT4, CARMIL2, RASSF2, CDH2	1283	13	16792	4.0271	1	0.773248	74.9057
GO:0014032~neural crest cell development	4	0.00182573	0.0713131	RDH10, EDN1, FOXC1, SOX9	1283	13	16792	4.0271	1	0.773248	74.9057
GO:0045663~positive regulation of myoblast differentiation	5	0.00228217	0.0713356	MEF2C, MAP3K5, CDON, BOC, IGFBP3	1283	21	16792	3.11621	1	0.771759	74.917
GO:0008277~regulation of G-protein coupled receptor protein signaling pathway	7	0.00319503	0.0734031	RGS11, PLCE1, RGS3, RGS4, RGS5, KCTD16, RAMP1	1283	39	16792	2.34914	1	0.780118	75.9403
GO:0006469~negative regulation of protein kinase activity	13	0.00593363	0.0739139	ASPN, PODNL1, PODN, SOCS2, ADORA2A, TRIB3, DCN, LRRC15, WWTR1, TRIB2, SH3BP5, GADD45B, CEACAM1	1283	99	16792	1.71864	1	0.780951	76.1869
GO:0042572~retinol metabolic process	6	0.0027386	0.0744782	ALDH1A1, RDH10, DHRS3, CYP1B1, DGAT2, RDH5	1283	30	16792	2.61761	1	0.782021	76.4566
GO:0030217~T cell differentiation	6	0.0027386	0.0744782	EGR1, PREX1, DLL4, JAG2, PTPN22, LFNG	1283	30	16792	2.61761	1	0.782021	76.4566
GO:0030154~cell differentiation	45	0.0205395	0.0750326	CADM1, MYO7B, PGF, FHL1, JAG2, ANPEP, GPM6B, ELK3, SLC7A5, CITED2, IGSF10, ADIRF, ARHGAP22, SPATA9, OSR2, RASGRP1, ROBO4, SOX15, SH2B3, ANGPT1, SRD5A2, ASF1B, ETV4, HIP1, ANGPTL4, INA, COL13A1, COL15A1, PRKCH, CENPF, MGP, DLL1, INSC, ARHGAP24, CSRP2, THEG, PTPRQ, INHBB, INHBA, TXNDC2, HES4, SFRP4, FCRLA, GADD45B, TMEM176B	1283	462	16792	1.27481	1	0.783033	76.7188
GO:0050728~negative regulation of inflammatory response	11	0.00502077	0.0773767	ZFP36, PTGIS, C1QTNF3, ADORA2A, SAA1, WFDC1, RORA, PBK, HGF, NT5E, KLF4	1283	79	16792	1.82239	1	0.792042	77.7969
GO:0010951~negative regulation of endopeptidase activity	15	0.0068465	0.0774334	COL4A3, A2M, BST2, SERPING1, VTN, PTTG1, SERPINH1, SPINT2, SERPINB7, ITIH4, ANOS1, ITIH5, WFDC1, SERPIND1, ITIH3	1283	121	16792	1.62249	1	0.790781	77.8224
GO:0043154~negative regulation of cysteine-type endopeptidase activity involved in apoptotic process	10	0.00456433	0.078332	ADORA2A, TNFAIP8, BIRC5, NAIP, WNT9A, HGF, THBS1, KLF4, IFI6, NGF	1283	69	16792	1.89682	1	0.793205	78.2226
GO:0031175~neuron projection development	13	0.00593363	0.078456	GPRIN1, EFHD1, STMN3, CLMN, PTK2B, MAP2, PHGDH, NLGN1, GDPD5, AREG, RAPGEF2, MYOC, FRY	1283	100	16792	1.70145	1	0.79225	78.2773
GO:0001701~in utero embryonic development	21	0.0095851	0.0788368	MUC1, RARRES2, NOG, ACVRL1, EDN1, JAG2, TGFB3, SOX6, TPM1, CCNB1, WNT7B, RDH10, MSX1, CCNB2, GATA6, APBA2, FOXC1, ANGPT1, ZFPM2, TMEM100, KLF2	1283	187	16792	1.46978	1	0.792409	78.4444
GO:0007568~aging	19	0.00867224	0.0793611	NUDT1, TRPC6, ASS1, KL, COL3A1, PTH1R, TGFB3, SERPING1, AURKB, DCN, ALDH3A1, KRT33B, VCAM1, CDKN1C, AMH, FOS, ADM, JUND, IGFBP5	1283	165	16792	1.50711	1	0.793184	78.6725
GO:0045184~establishment of protein localization	7	0.00319503	0.081053	KIF14, CARMIL2, PLK1, ANK3, NLGN1, ITGA2, CEP55	1283	40	16792	2.29041	1	0.798854	79.3932
GO:0030819~positive regulation of cAMP biosynthetic process	7	0.00319503	0.081053	PTHLH, PTGIR, ADM, ADCY7, ADORA2A, AKAP12, RAMP1	1283	40	16792	2.29041	1	0.798854	79.3932
GO:0060045~positive regulation of cardiac muscle cell proliferation	5	0.00228217	0.0821454	CCNB1, WNT2, MEF2C, GATA6, ZFPM2	1283	22	16792	2.97456	1	0.801903	79.8462
GO:0048147~negative regulation of fibroblast proliferation	6	0.0027386	0.0834843	NUPR1, SFRP1, DACH1, PAWR, PMAIP1, SOD2	1283	31	16792	2.53318	1	0.805869	80.3885
GO:0043507~positive regulation of JUN kinase activity	6	0.0027386	0.0834843	FZD8, MAP3K5, PTK2B, EDN1, FZD5, FZD4	1283	31	16792	2.53318	1	0.805869	80.3885
GO:0007205~protein kinase C-activating G-protein coupled receptor signaling pathway	6	0.0027386	0.0834843	PLCE1, ADORA2A, DGKG, EDN1, HTR2B, GAP43	1283	31	16792	2.53318	1	0.805869	80.3885
GO:0046676~negative regulation of insulin secretion	6	0.0027386	0.0834843	INHBB, SFRP1, KCNB1, ADRA2A, PDE8B, IRS1	1283	31	16792	2.53318	1	0.805869	80.3885
GO:0008016~regulation of heart contraction	6	0.0027386	0.0834843	TNNT2, THRB, CHRM2, CACNA1H, HBEGF, TPM1	1283	31	16792	2.53318	1	0.805869	80.3885
GO:0007265~Ras protein signal transduction	10	0.00456433	0.0841188	LAT, PLCE1, PLK2, RASGRP3, RASGRP1, RRAS2, RASGRP2, ADRA2A, IQGAP3, CCNA2	1283	70	16792	1.86972	1	0.806968	80.6407
GO:0071425~hematopoietic stem cell proliferation	4	0.00182573	0.0857958	WNT5A, CD34, RUNX1, WNT2B	1283	14	16792	3.73945	1	0.812088	81.2925
GO:0043537~negative regulation of blood vessel endothelial cell migration	4	0.00182573	0.0857958	ACVRL1, RGCC, THBS1, ANGPT2	1283	14	16792	3.73945	1	0.812088	81.2925
GO:0060065~uterus development	4	0.00182573	0.0857958	CDKN1C, WNT5A, MYOCD, TGFB2	1283	14	16792	3.73945	1	0.812088	81.2925
GO:0022011~myelination in peripheral nervous system	4	0.00182573	0.0857958	LAMA2, ADGRG6, LGI4, MYOC	1283	14	16792	3.73945	1	0.812088	81.2925
GO:0001516~prostaglandin biosynthetic process	4	0.00182573	0.0857958	PTGIS, PTGDS, EDN1, PTGS1	1283	14	16792	3.73945	1	0.812088	81.2925
GO:0006814~sodium ion transport	11	0.00502077	0.0882329	SCN1A, SCN3B, SLC22A4, SLC10A6, SCN9A, SLC4A8, SLC6A15, FGF13, SLC38A11, SLC38A1, SLC4A4	1283	81	16792	1.77739	1	0.819846	82.2027
GO:0035023~regulation of Rho protein signal transduction	11	0.00502077	0.0882329	PLEKHG4, ARHGEF4, DLC1, VAV3, RASGRF2, ARHGEF39, PREX1, PREX2, SPATA13, ARHGDIB, NET1	1283	81	16792	1.77739	1	0.819846	82.2027
GO:0007601~visual perception	22	0.0100415	0.0883718	MYO5A, GLRB, CYP1B1, NXNL2, FSCN2, LUM, NDP, MYO7A, EFEMP1, ABCA4, RDH5, RDH10, DHRS3, HMCN1, TACSTD2, DLL4, TGFBI, COL1A1, HSF4, CRYBA1, COL11A1, ABCC6	1283	201	16792	1.43253	1	0.818997	82.2533
GO:0097190~apoptotic signaling pathway	10	0.00456433	0.0901549	TNFRSF6B, TNFRSF21, CASP10, MAP3K5, PTGIS, RELT, MLLT11, PAWR, HIP1, DAPK1	1283	71	16792	1.84339	1	0.824091	82.8909
GO:0071347~cellular response to interleukin-1	10	0.00456433	0.0901549	CCL11, PTGIS, SFRP1, EDN1, CXCL8, HAS2, RORA, KLF2, SOX9, CCL26	1283	71	16792	1.84339	1	0.824091	82.8909
GO:0007179~transforming growth factor beta receptor signaling pathway	12	0.0054772	0.091137	FOS, SMAD9, ACVRL1, SMAD6, COL3A1, GDF5, FERMT2, TGFB3, COL1A2, BAMBI, TGFB2, CITED2	1283	92	16792	1.70714	1	0.826228	83.2327
GO:0001974~blood vessel remodeling	6	0.0027386	0.0930369	MEF2C, ACVRL1, DLL4, SEMA3C, FOXC1, TGFB2	1283	32	16792	2.45401	1	0.831461	83.8757
GO:0003007~heart morphogenesis	6	0.0027386	0.0930369	DLC1, FAT4, GAA, HTR2B, COL5A1, TGFB2	1283	32	16792	2.45401	1	0.831461	83.8757
GO:0048167~regulation of synaptic plasticity	6	0.0027386	0.0930369	MEF2C, PLK2, FGF14, ADORA2A, RAPGEF2, ITPKA	1283	32	16792	2.45401	1	0.831461	83.8757
GO:0006270~DNA replication initiation	6	0.0027386	0.0930369	CDC45, POLE2, GINS4, POLA2, MCM10, ORC1	1283	32	16792	2.45401	1	0.831461	83.8757
GO:0032967~positive regulation of collagen biosynthetic process	5	0.00228217	0.0937082	RGCC, SERPINB7, TGFB3, CREB3L1, ITGA2	1283	23	16792	2.84523	1	0.832431	84.0973
GO:0051966~regulation of synaptic transmission, glutamatergic	5	0.00228217	0.0937082	MEF2C, GRM4, SYT1, DKK1, UNC13A	1283	23	16792	2.84523	1	0.832431	84.0973
GO:0032308~positive regulation of prostaglandin secretion	3	0.0013693	0.0945742	EDN1, IL1B, MAP2K6	1283	7	16792	5.60917	1	0.834034	84.3789
GO:0090091~positive regulation of extracellular matrix disassembly	3	0.0013693	0.0945742	MELTF, CARMIL2, TGFB2	1283	7	16792	5.60917	1	0.834034	84.3789
GO:0060907~positive regulation of macrophage cytokine production	3	0.0013693	0.0945742	WNT5A, SEMA7A, GPRC5B	1283	7	16792	5.60917	1	0.834034	84.3789
GO:0044321~response to leptin	3	0.0013693	0.0945742	CCND1, STAR, EDN1	1283	7	16792	5.60917	1	0.834034	84.3789
GO:0097264~self proteolysis	3	0.0013693	0.0945742	TENM4, TENM2, TENM3	1283	7	16792	5.60917	1	0.834034	84.3789
GO:0008064~regulation of actin polymerization or depolymerization	3	0.0013693	0.0945742	TMSB4Y, CIT, CXCL12	1283	7	16792	5.60917	1	0.834034	84.3789
GO:0014009~glial cell proliferation	3	0.0013693	0.0945742	PTK2B, LGI4, AREG	1283	7	16792	5.60917	1	0.834034	84.3789
GO:0045162~clustering of voltage-gated sodium channels	3	0.0013693	0.0945742	NRCAM, GLDN, MYOC	1283	7	16792	5.60917	1	0.834034	84.3789
GO:2001259~positive regulation of cation channel activity	3	0.0013693	0.0945742	ANK3, CTSS, NTSR1	1283	7	16792	5.60917	1	0.834034	84.3789
GO:0060998~regulation of dendritic spine development	3	0.0013693	0.0945742	MEF2C, SDK1, CAMK2B	1283	7	16792	5.60917	1	0.834034	84.3789
GO:0002315~marginal zone B cell differentiation	3	0.0013693	0.0945742	PTK2B, DLL1, LFNG	1283	7	16792	5.60917	1	0.834034	84.3789
GO:0061626~pharyngeal arch artery morphogenesis	3	0.0013693	0.0945742	NOG, FOLR1, TGFB2	1283	7	16792	5.60917	1	0.834034	84.3789
GO:0032466~negative regulation of cytokinesis	3	0.0013693	0.0945742	E2F7, E2F8, AURKB	1283	7	16792	5.60917	1	0.834034	84.3789
GO:0043031~negative regulation of macrophage activation	3	0.0013693	0.0945742	BPI, CD200, IL31RA	1283	7	16792	5.60917	1	0.834034	84.3789
GO:0051988~regulation of attachment of spindle microtubules to kinetochore	3	0.0013693	0.0945742	NEK2, SPAG5, RACGAP1	1283	7	16792	5.60917	1	0.834034	84.3789
GO:0007156~homophilic cell adhesion via plasma membrane adhesion molecules	18	0.0082158	0.0950388	CADM4, CLSTN2, CADM1, PCDH10, SDK1, PCDH12, CDH2, PCDH7, CDH4, CDH6, AMIGO2, FAT3, FAT4, TENM3, SMAGP, PCDHA12, CD200, CEACAM1	1283	158	16792	1.49105	1	0.834293	84.528
GO:0097191~extrinsic apoptotic signaling pathway	7	0.00319503	0.0976275	INHBA, MLLT11, G0S2, IL33, IL6R, TGFB2, RNF41	1283	42	16792	2.18135	1	0.841378	85.3345
GO:0060348~bone development	7	0.00319503	0.0976275	SMAD9, SULF2, SULF1, STC1, SRD5A2, SPARC, MYOC	1283	42	16792	2.18135	1	0.841378	85.3345
GO:0030178~negative regulation of Wnt signaling pathway	8	0.00365147	0.0988733	DKK2, CCND1, DACT1, DKK1, SFRP1, SFRP4, NOTUM, HMGA2	1283	52	16792	2.01355	1	0.84403	85.7083
GO:0034097~response to cytokine	8	0.00365147	0.0988733	FOS, CXCL16, COL3A1, JUND, ITIH4, OXTR, IL6R, SPARC	1283	52	16792	2.01355	1	0.84403	85.7083
