# Supplementary material for: RNA sequencing analysis of FGF2-responsive transcriptome in skin fibroblasts
Source: PeerJ. 2021 Jan 15;9:e10671. doi: 10.7717/peerj.10671 (PMC7812929; doi:10.7717/peerj.10671)
Supplement: Supplemental Information 7 [file peerj-09-10671-s007.xlsx]

## Sheet: Table S3
Additional file 7. Significant networks between LncRNAs and mRNA
LcnRNA	mRNA	pearson correlation	p Value
AC002074.1	MN1	0.998196	4.87784e-06
AC002074.1	GRHL1	0.997684	8.04193e-06
AC002074.1	EPHB6	0.995927	2.48447e-05
AC002074.1	SNCAIP	0.994375	4.73764e-05
AC002074.1	CARMIL1	0.993548	6.2306e-05
AC002074.1	ITGB4	0.992939	7.46158e-05
AC002074.1	ATF3	0.992763	7.83808e-05
AC002074.1	NGF	0.992525	8.3603e-05
AC002074.1	TMC6	0.992062	9.42789e-05
AC002074.1	TSPAN2	0.99194	9.71863e-05
AC002074.1	C1QTNF5	0.991829	9.9883e-05
AC002074.1	HCRTR1	0.991558	0.000106597
AC002074.1	GHR	0.991447	0.000109407
AC002074.1	JAG2	0.991103	0.000118379
AC002074.1	KIAA1958	0.990765	0.000127522
AC002074.1	SYDE2	0.989572	0.000162537
AC002074.1	ABI3BP	0.989564	0.000162808
AC002074.1	TNFAIP8	0.989382	0.000168529
AC002074.1	ABCA4	0.989329	0.000170183
AC002074.1	ANKRD24	0.989305	0.00017097
AC002074.1	BOC	0.989026	0.000179977
AC002074.1	CACNG4	0.988849	0.000185816
AC002074.1	ELN	0.988585	0.000194697
AC002074.1	HSF4	0.988521	0.000196897
AC002074.1	PSG9	0.988465	0.000198801
AC002074.1	PTGDS	0.987597	0.000229803
AC002074.1	ANXA3	0.987541	0.000231872
AC002074.1	DLC1	0.987484	0.000234009
AC002074.1	EDN1	0.987419	0.00023642
AC002074.1	ADGRB2	0.987259	0.00024248
AC002074.1	PARD3B	0.987135	0.000247205
AC002074.1	ADRA2A	0.987118	0.000247864
AC002074.1	TMEM130	0.987061	0.000250029
AC002074.1	PDGFA	0.986723	0.00026325
AC002074.1	COLEC10	-0.986541	0.000270501
AC002074.1	AC244197.3	0.985578	0.000310471
AC002074.1	KAZN	0.985384	0.000318891
AC002074.1	FIBIN	0.985227	0.000325739
AC002074.1	SGSM1	0.984682	0.000350159
AC002074.1	NRXN3	0.984442	0.000361192
AC002074.1	SDC2	0.984434	0.000361578
AC002074.1	PLEKHA6	0.98414	0.000375296
AC002074.1	ROR2	0.983606	0.000400961
AC002074.1	ODF3B	0.98354	0.000404177
AC002074.1	GASK1B	0.9834	0.000411044
AC002074.1	DNAH12	0.983239	0.000419021
AC002074.1	ATXN7L2	0.983181	0.000421923
AC002074.1	SEMA4A	0.98318	0.000421983
AC002074.1	ANKFN1	0.98318	0.000421997
AC002074.1	CORO6	0.98314	0.000424014
AC002074.1	KRT7	0.983123	0.000424826
AC002074.1	GRIK2	0.982442	0.000459721
AC002074.1	CTH	0.982091	0.000478204
AC002074.1	MATN2	0.98198	0.000484165
AC002074.1	GAL3ST2	0.981763	0.000495848
AC002074.1	AC005020.2	0.981701	0.000499225
AC002074.1	NREP	0.981547	0.000507616
AC002074.1	BDNF	0.981478	0.000511421
AC002074.1	VWA5A	-0.981365	0.000517681
AC002074.1	SFRP4	0.981344	0.000518831
AC002074.1	FCRLB	-0.981047	0.000535395
AC002074.1	ENTPD7	0.98084	0.000547144
AC002074.1	CHEK1	-0.980672	0.000556752
AC002074.1	PLPP4	0.98059	0.000561455
AC002074.1	GABBR2	0.980465	0.000568672
AC002074.1	PCDH7	0.980179	0.000585428
AC002074.1	POLE2	-0.979833	0.000605985
AC002074.1	KLF2	0.979666	0.000615987
AC002074.1	PRICKLE1	0.979529	0.00062429
AC002074.1	BAALC	-0.979444	0.000629458
AC002074.1	KCNJ8	0.979436	0.000629941
AC002074.1	BCAT1	0.979374	0.000633741
AC002074.1	GPRC5B	0.979323	0.000636908
AC002074.1	SPTB	-0.979313	0.000637522
AC002074.1	DAAM2	0.979095	0.000650938
AC002074.1	TMEM132E	0.978938	0.000660744
AC002074.1	ADAMTS5	0.978864	0.00066539
AC002074.1	AC068580.4	0.978661	0.000678156
AC002074.1	CMKLR1	-0.978647	0.000679044
AC002074.1	RHOBTB1	0.978614	0.000681157
AC002074.1	EFHD1	0.97848	0.000689699
AC002074.1	AC005747.1	0.978447	0.000691777
AC002074.1	CDH4	0.978153	0.000710706
AC002074.1	GPR132	0.978084	0.000715216
AC002074.1	FAM107A	-0.978047	0.000717594
AC002074.1	TMSB4Y	0.977714	0.00073946
AC002074.1	LOX	0.97766	0.000743014
AC002074.1	GDF7	0.977462	0.000756234
AC002074.1	PTK2B	0.977455	0.000756676
AC002074.1	ISG20	-0.977394	0.00076077
AC002074.1	GINS4	-0.977257	0.000769982
AC002074.1	EBF4	0.976876	0.00079587
AC002074.1	GDPD5	0.976794	0.000801513
AC002074.1	JUND	0.976648	0.000811616
AC002074.1	PADI1	0.976395	0.000829226
AC002074.1	STXBP6	0.97612	0.000848551
AC002074.1	PTPRQ	0.976098	0.00085012
AC002074.1	SPINT2	0.976081	0.000851327
AC002074.1	ERVMER34-1	0.976059	0.000852877
AC002074.1	UNC79	0.976014	0.00085606
AC002074.1	C1orf198	0.97595	0.000860683
AC002074.1	PPP1R13L	0.975909	0.000863591
AC002074.1	ADAM12	0.975861	0.000867005
AC002074.1	GPRC5A	0.975638	0.000882997
AC002074.1	CTSH	0.975367	0.000902685
AC002074.1	DHRS3	0.975255	0.000910877
AC002074.1	MRVI1	0.974995	0.000930065
AC002074.1	NXPH3	0.974949	0.000933436
AC002074.1	ANKRD33B	0.974783	0.000945835
AC002074.1	OXTR	0.974667	0.000954529
AC002074.1	KCNJ2	0.974559	0.000962602
AC002074.1	FOXC1	0.974249	0.00098611
AC002074.1	MGAT3	0.97403	0.00100292
AC002074.1	FBN1	0.973896	0.00101321
AC002074.1	PODNL1	0.97389	0.00101369
AC002074.1	PALM	0.973801	0.00102059
AC002074.1	BDH1	-0.973425	0.00104999
AC002074.1	NUAK1	0.972988	0.00108459
AC002074.1	KLF5	0.972853	0.00109545
AC002074.1	MTCL1	0.972823	0.00109783
AC002074.1	NFIX	0.972657	0.00111127
AC002074.1	PXDC1	0.972235	0.00114564
AC002074.1	TRIB3	0.97217	0.00115096
AC002074.1	PAWR	0.972047	0.00116117
AC002074.1	PTH1R	0.972039	0.00116177
AC002074.1	B4GALT4	0.971956	0.0011687
AC002074.1	FMO4	0.97192	0.00117168
AC002074.1	CDKN1C	0.971897	0.00117359
AC002074.1	CSRP2	0.971626	0.00119621
AC002074.1	IGFBP5	0.971525	0.0012047
AC002074.1	IRS2	0.971303	0.00122348
AC002074.1	SAMD3	-0.971054	0.00124468
AC002074.1	SOCS2	-0.971036	0.00124625
AC002074.1	EGR1	0.97085	0.0012622
AC002074.1	ELK3	-0.970634	0.00128088
AC002074.1	MTHFD2	0.970571	0.00128635
AC002074.1	AJUBA	0.970525	0.00129033
AC002074.1	CCDC85A	0.970326	0.00130775
AC002074.1	AL049629.2	-0.970258	0.00131376
AC002074.1	ST6GALNAC2	-0.970193	0.00131948
AC002074.1	PCDH10	0.970163	0.00132213
AC002074.1	PSAT1	0.969858	0.0013491
AC002074.1	DUSP8	0.969425	0.00138796
AC002074.1	TLCD2	0.969255	0.00140331
AC002074.1	JDP2	0.968541	0.00146892
AC002074.1	PHGDH	0.968426	0.00147964
AC002074.1	CBSL	0.968311	0.00149036
AC002074.1	CACNA1H	0.968225	0.00149844
AC002074.1	COL4A1	0.96821	0.00149988
AC002074.1	COL4A2	0.968104	0.0015098
AC002074.1	HIVEP3	-0.968058	0.00151417
AC002074.1	THBS2	0.968037	0.00151615
AC002074.1	KIZ	0.967885	0.00153045
AC002074.1	ITGBL1	0.967816	0.00153708
AC002074.1	KIAA1755	0.967731	0.00154511
AC002074.1	THBS1	0.967713	0.00154685
AC002074.1	FCMR	-0.967656	0.00155231
AC002074.1	SLC7A5	0.967538	0.00156358
AC002074.1	WNT5A	0.967446	0.00157237
AC002074.1	RHOBTB3	0.967393	0.00157754
AC002074.1	PLPPR4	0.967336	0.00158296
AC002074.1	NTF3	0.967329	0.00158361
AC002074.1	CPN2	0.967268	0.00158958
AC002074.1	PKP4	0.967208	0.0015953
AC002074.1	AC068831.7	-0.967126	0.00160327
AC002074.1	AMOTL2	0.967003	0.00161523
AC002074.1	MAB21L1	0.96688	0.00162728
AC002074.1	CXCL14	0.96687	0.00162817
AC002074.1	SH3BP5	0.966788	0.00163627
AC002074.1	CRISPLD2	0.96677	0.001638
AC002074.1	TINAGL1	0.966687	0.00164614
AC002074.1	ALDH1A1	0.966413	0.00167315
AC002074.1	PEAR1	0.96637	0.00167746
AC002074.1	RACGAP1	-0.966249	0.00168949
AC002074.1	EPDR1	0.96603	0.00171134
AC002074.1	VASN	0.965954	0.00171897
AC002074.1	HLA-F	0.965746	0.00173993
AC002074.1	SYNPO2	0.96548	0.00176683
AC002074.1	INTU	0.965479	0.00176702
AC002074.1	CCN1	0.965306	0.00178466
AC002074.1	CENPF	-0.965146	0.00180099
AC002074.1	MELTF	0.964784	0.00183846
AC002074.1	TMTC2	0.964708	0.00184636
AC002074.1	FAP	0.96442	0.00187633
AC002074.1	C6orf132	0.9644	0.00187853
AC002074.1	MEGF6	0.964217	0.00189776
AC002074.1	TMEM176B	0.964139	0.00190599
AC002074.1	WARS	0.964076	0.00191257
AC002074.1	TBC1D8	-0.963917	0.00192945
AC002074.1	MMP16	-0.963834	0.00193834
AC002074.1	CEBPG	0.963818	0.00194007
AC002074.1	FHL1	0.963706	0.00195193
AC002074.1	TAGLN	0.963288	0.00199696
AC002074.1	RNASET2	0.963193	0.00200715
AC002074.1	ZNF711	0.963082	0.00201925
AC002074.1	ZFP36	0.963066	0.00202095
AC002074.1	ZNF469	0.962827	0.00204711
AC002074.1	ANO3	0.962776	0.00205267
AC002074.1	CKAP2L	-0.962755	0.00205496
AC002074.1	COL1A1	0.962713	0.00205953
AC002074.1	RNF150	0.962709	0.00206005
AC002074.1	RUNX1	0.962462	0.00208725
AC002074.1	RARRES2	0.962319	0.00210305
AC002074.1	PTHLH	0.962267	0.00210876
AC002074.1	COL8A2	0.962242	0.0021116
AC002074.1	CRACR2A	-0.96215	0.00212186
AC002074.1	COBLL1	0.962121	0.00212503
AC002074.1	FZD7	0.961989	0.00213977
AC002074.1	KCND3	0.961887	0.0021512
AC002074.1	KIF26B	0.961844	0.00215604
AC002074.1	KLF4	0.961498	0.00219502
AC002074.1	CDH2	0.961458	0.00219961
AC002074.1	SLC6A9	0.961357	0.00221104
AC002074.1	SYTL5	0.961189	0.00223026
AC002074.1	PGRMC2	0.96106	0.00224493
AC002074.1	B3GALT2	0.960985	0.00225361
AC002074.1	ALPL	0.960977	0.00225447
AC002074.1	STEAP1B	-0.960933	0.00225948
AC002074.1	MYL9	0.960923	0.00226066
AC002074.1	TPM1	0.96092	0.00226108
AC002074.1	CCL11	0.960884	0.00226518
AC002074.1	FBN2	0.960645	0.00229274
AC002074.1	NETO1	-0.96064	0.0022933
AC002074.1	CNN1	0.960633	0.00229415
AC002074.1	F3	0.960569	0.00230158
AC002074.1	AP002956.1	0.960567	0.00230182
AC002074.1	CLCNKB	0.960555	0.00230313
AC002074.1	RAC2	-0.960549	0.00230389
AC002074.1	JPH2	0.960469	0.00231313
AC002074.1	AK5	-0.960353	0.00232667
AC002074.1	TUFT1	0.960157	0.00234957
AC002074.1	ZNF792	-0.959989	0.0023693
AC002074.1	ANLN	-0.959927	0.00237658
AC002074.1	ADGRD1	0.959907	0.00237899
AC002074.1	PSG1	0.959667	0.0024073
AC002074.1	PITPNC1	-0.95939	0.00244024
AC002074.1	HSPG2	0.95915	0.00246902
AC002074.1	TTC9	0.95905	0.00248104
AC002074.1	AKAP12	0.959002	0.00248683
AC002074.1	ASF1B	-0.958967	0.00249099
AC002074.1	PNP	-0.958631	0.00253173
AC002074.1	SEMA3C	0.958591	0.00253656
AC002074.1	SH2B3	-0.958557	0.00254069
AC002074.1	PAMR1	-0.958441	0.00255484
AC002074.1	SLC38A1	0.958435	0.00255556
AC002074.1	RAP1GAP2	-0.958385	0.00256165
AC002074.1	SOX6	0.958217	0.00258219
AC002074.1	AL121768.1	0.958122	0.00259395
AC002074.1	NEDD9	0.958108	0.00259566
AC002074.1	SEMA3B	0.958086	0.00259833
AC002074.1	GAB2	0.958084	0.00259863
AC002074.1	FSTL1	0.958052	0.00260252
AC002074.1	IRS1	0.957836	0.0026292
AC002074.1	NR4A3	-0.957784	0.00263566
AC002074.1	DACT1	0.957759	0.00263882
AC002074.1	PLSCR4	0.957717	0.00264402
AC002074.1	GADD45B	0.957703	0.00264569
AC002074.1	CCN2	0.957688	0.00264758
AC002074.1	KCNJ6	-0.957533	0.00266693
AC002074.1	CCDC102B	-0.957514	0.00266926
AC002074.1	DUSP7	-0.95748	0.00267355
AC002074.1	TMEM178A	0.957465	0.00267539
AC002074.1	CDCA8	-0.957296	0.00269647
AC002074.1	KCTD15	0.957195	0.00270919
AC002074.1	KIAA1549L	-0.957135	0.00271669
AC002074.1	KCNMB4	0.957102	0.00272083
AC002074.1	TFAP2C	-0.957079	0.00272377
AC002074.1	SELPLG	-0.957064	0.00272563
AC002074.1	RDH10	0.9569	0.00274638
AC002074.1	DACH1	-0.956792	0.00276001
AC002074.1	FRY	0.956712	0.0027702
AC002074.1	KRT34	0.956616	0.00278238
AC002074.1	SMAGP	-0.956548	0.00279113
AC002074.1	MARS	0.956505	0.00279662
AC002074.1	SULF1	0.956496	0.00279777
AC002074.1	DDIT3	0.956494	0.00279795
AC002074.1	TRIM16L	0.956247	0.00282965
AC002074.1	PRAG1	0.956179	0.00283834
AC002074.1	COL16A1	0.95616	0.00284081
AC002074.1	ADAMTS1	0.956154	0.00284156
AC002074.1	CCDC81	0.956082	0.00285084
AC002074.1	OSCAR	-0.956008	0.0028604
AC002074.1	CD59	-0.955967	0.00286569
AC002074.1	MKX	0.955912	0.00287274
AC002074.1	THRB	0.955905	0.00287369
AC002074.1	RAPGEF2	0.955875	0.00287761
AC002074.1	FAT4	0.95586	0.00287945
AC002074.1	TNFRSF6B	-0.955764	0.00289197
AC002074.1	SCARA5	-0.955448	0.00293316
AC002074.1	SLC24A3	-0.955355	0.00294524
AC002074.1	EFL1	-0.955296	0.00295306
AC002074.1	ZC3H12C	-0.955238	0.00296058
AC002074.1	RELT	-0.955175	0.0029689
AC002074.1	NBL1	-0.955057	0.00298439
AC002074.1	MGP	0.95502	0.00298927
AC002074.1	C15orf48	-0.95481	0.00301711
AC002074.1	MAP2	0.954796	0.00301886
AC002074.1	DUSP4	-0.954783	0.00302069
AC002074.1	PCSK9	0.954647	0.00303867
AC002074.1	NPR3	0.954547	0.00305201
AC002074.1	ETV1	-0.954499	0.0030584
AC002074.1	RGS17	-0.954309	0.00308378
AC002074.1	VCAM1	0.954261	0.0030902
AC002074.1	FSTL3	0.954193	0.00309936
AC002074.1	SYPL2	0.954167	0.0031029
AC002074.1	ADM2	0.954141	0.00310636
AC002074.1	ITIH3	0.953966	0.00312992
AC002074.1	ALPK2	0.953882	0.00314128
AC002074.1	GAP43	-0.953836	0.00314755
AC002074.1	KCNJ15	-0.953805	0.00315165
AC002074.1	MINDY4	-0.953706	0.00316504
AC002074.1	VAT1L	-0.953683	0.00316827
AC002074.1	CYP26B1	-0.953565	0.00318428
AC002074.1	STX1A	-0.953408	0.00320567
AC002074.1	E2F8	-0.95339	0.00320806
AC002074.1	CNIH3	-0.953258	0.00322618
AC002074.1	CITED2	0.953226	0.0032306
AC002074.1	TCAF2	-0.953186	0.00323604
AC002074.1	ARHGEF4	0.953172	0.00323791
AC002074.1	ISM1	-0.953083	0.0032502
AC002074.1	DOCK4	-0.953049	0.0032548
AC002074.1	PDE3A	0.952861	0.00328072
AC002074.1	AMPD3	-0.952861	0.00328073
AC002074.1	VEPH1	-0.952751	0.00329596
AC002074.1	FGFR3	0.952554	0.00332327
AC002074.1	ARHGAP9	0.952505	0.00333014
AC002074.1	COL1A2	0.952432	0.00334028
AC002074.1	BACH2	-0.952328	0.0033548
AC002074.1	ANGPT1	0.952321	0.00335575
AC002074.1	KCNQ5	-0.952211	0.0033711
AC002074.1	C17orf107	0.952203	0.00337226
AC002074.1	NES	-0.952172	0.00337663
AC002074.1	ST3GAL5	-0.952138	0.0033813
AC002074.1	PDE1C	0.952094	0.00338752
AC002074.1	FMNL3	-0.952055	0.00339302
AC002074.1	ICOSLG	-0.951935	0.00340987
AC002074.1	GLUL	-0.951866	0.00341949
AC002074.1	CRYBG1	-0.951832	0.0034244
AC002074.1	RAMP1	0.951772	0.00343289
AC002074.1	IRAK2	-0.951759	0.0034346
AC002074.1	IL1B	-0.951652	0.00344982
AC002074.1	SCN9A	0.951649	0.00345015
AC002074.1	GALE	-0.951569	0.00346156
AC002074.1	NT5E	-0.951561	0.00346266
AC002074.1	SYNPO	0.951549	0.0034644
AC002074.1	GABARAPL1	0.951543	0.00346521
AC002074.1	CLSTN2	0.951218	0.00351142
AC002074.1	A2M	0.951175	0.00351766
AC002074.1	HAS2	-0.95116	0.00351975
AC002074.1	CAVIN2	-0.951129	0.00352416
AC002074.1	APBA2	-0.95111	0.00352696
AC002074.1	SERPING1	0.950983	0.00354509
AC002074.1	CDKN3	-0.95088	0.00355991
AC002074.1	EGR3	0.95078	0.00357422
AC002074.1	EVI2A	-0.950759	0.0035773
AC002074.1	SOGA3	-0.950746	0.00357921
AC002074.1	ABHD2	-0.950715	0.0035837
AC002074.1	ETV4	-0.950667	0.00359062
AC002074.1	LYL1	-0.950658	0.00359192
AC002074.1	SLC3A2	0.95057	0.00360454
AC002074.1	CYP1B1	0.950528	0.00361069
AC002074.1	HPCAL1	-0.950486	0.00361671
AC002074.1	AIM2	-0.950381	0.00363204
AC002074.1	USP43	0.950315	0.00364157
AC002074.1	PSG5	0.95027	0.00364812
AC002074.1	LTBP1	-0.950247	0.00365148
AC002074.1	RITA1	-0.950171	0.00366252
AC002074.1	RASSF8	-0.950144	0.00366643
AC002074.1	FN1	0.950049	0.00368038
AC002074.1	SPHKAP	-0.950015	0.00368525
AC004130.1	USP2	0.993665	6.00662e-05
AC004130.1	IFI6	0.99044	0.000136648
AC004130.1	CDH6	0.985727	0.000304127
AC004130.1	TTC36	0.981903	0.000488299
AC004130.1	DNAH12	0.975836	0.000868817
AC004130.1	GAL3ST2	0.973253	0.00106353
AC004130.1	INTU	0.97317	0.00107012
AC004130.1	TMEM176B	0.972773	0.00110186
AC004130.1	AL121768.1	0.972709	0.001107
AC004130.1	KIF21B	-0.972057	0.0011603
AC004130.1	PSG7	0.971695	0.00119043
AC004130.1	GABBR2	0.971559	0.00120185
AC004130.1	EBF4	0.970636	0.0012807
AC004130.1	CFAP157	0.966381	0.00167637
AC004130.1	PODXL	-0.9652	0.00179551
AC004130.1	IGFN1	-0.960452	0.00231516
AC004130.1	LRRTM2	-0.960342	0.002328
AC004130.1	FOLR1	0.959354	0.00244462
AC004130.1	HSF4	0.95866	0.00252822
AC004130.1	ANXA3	0.958511	0.00254625
AC004130.1	THRB	0.957208	0.00270757
AC004130.1	MGAT3	0.95694	0.00274136
AC004130.1	GHR	0.956495	0.00279788
AC004130.1	SLC7A4	-0.955603	0.00291292
AC004130.1	ABCA4	0.955414	0.00293753
AC004130.1	PTH1R	0.955372	0.00294308
AC004130.1	KRT15	-0.953655	0.00317198
AC004130.1	AC105052.1	0.953631	0.00317533
AC004130.1	KCNJ8	0.953412	0.00320504
AC004130.1	TMTC2	0.952853	0.00328189
AC004130.1	DHRS13	-0.952238	0.00336729
AC004130.1	KBTBD11	0.95142	0.0034827
AC004130.1	PADI1	0.950802	0.00357116
AC004584.3	MPP4	-0.997922	6.47312e-06
AC004584.3	LRRC25	0.992771	7.81898e-05
AC004584.3	GABRA5	0.989528	0.000163935
AC004584.3	LTC4S	0.981648	0.000502098
AC004584.3	MYL3	0.970055	0.00133161
AC004584.3	ZNF853	0.958785	0.00251304
AC004584.3	POLA2	-0.958642	0.00253034
AC004584.3	RADX	0.958086	0.00259833
AC004584.3	SLC4A4	0.957845	0.00262812
AC004584.3	TNFRSF13C	0.957704	0.00264561
AC004584.3	MARCKS	0.957482	0.00267325
AC004584.3	AC009690.1	0.955461	0.00293142
AC004584.3	LCNL1	0.95486	0.00301047
AC004584.3	GAS1	0.95275	0.00329613
AC004584.3	PC	-0.951624	0.00345377
AC004784.1	GRM4	0.987876	0.000219592
AC004784.1	DOK6	0.97789	0.00072788
AC004784.1	TPD52	0.970835	0.00126346
AC004784.1	FAT3	0.967364	0.00158031
AC004784.1	NALCN	0.953572	0.00318329
AC005280.2	RGS11	-0.981668	0.000501024
AC005280.2	CENPA	0.979609	0.000619479
AC005280.2	IL16	-0.972856	0.00109522
AC005280.2	TSPAN1	0.97046	0.00129604
AC005280.2	RIPK4	0.969798	0.00135446
AC005280.2	THEG	0.969628	0.00136964
AC005280.2	EFCC1	0.969568	0.00137505
AC005280.2	C5AR1	-0.965691	0.00174546
AC005280.2	WDR54	0.964718	0.00184528
AC005280.2	ARHGDIB	0.964649	0.00185244
AC005280.2	DEPDC1B	0.96129	0.00221871
AC005280.2	HOXA7	0.959752	0.00239722
AC005280.2	IL3RA	0.95895	0.00249308
AC005280.2	ACPP	0.95864	0.00253059
AC005280.2	DRAXIN	0.958577	0.00253827
AC005280.2	HBEGF	0.958489	0.00254895
AC005280.2	NRG2	0.956526	0.00279393
AC005280.2	GCKR	0.95644	0.00280493
AC005280.2	RDH5	0.9563	0.00282286
AC005280.2	NCALD	0.954282	0.00308741
AC005280.2	PLEKHN1	0.952499	0.00333086
AC005280.2	SNURF	0.952411	0.00334318
AC005280.2	ZBTB16	0.95171	0.00344161
AC005280.3	LPAR3	0.998948	1.65928e-06
AC005280.3	HMGA2	0.998928	1.72376e-06
AC005280.3	SPATA13	0.998758	2.31202e-06
AC005280.3	ACYP1	0.998589	2.98355e-06
AC005280.3	PLEKHG4	0.998552	3.14209e-06
AC005280.3	KCNQ5	0.998529	3.24237e-06
AC005280.3	VAT1L	0.99828	4.43407e-06
AC005280.3	SFRP1	0.997706	7.88471e-06
AC005280.3	CCNA2	0.997697	7.95214e-06
AC005280.3	SYNM	0.997647	8.30192e-06
AC005280.3	DOCK4	0.997581	8.77149e-06
AC005280.3	NT5E	0.997549	9.00722e-06
AC005280.3	CPNE3	0.99725	1.13338e-05
AC005280.3	KCNJ15	0.997204	1.17141e-05
AC005280.3	MMP3	0.997129	1.23488e-05
AC005280.3	SERPIND1	0.996938	1.40481e-05
AC005280.3	ARG2	0.9969	1.43986e-05
AC005280.3	MLLT11	0.996818	1.51711e-05
AC005280.3	PMAIP1	0.996682	1.64942e-05
AC005280.3	GAP43	0.996639	1.69231e-05
AC005280.3	TNFRSF19	0.996281	2.072e-05
AC005280.3	PAQR8	0.996149	2.22202e-05
AC005280.3	KCNJ6	0.996114	2.26212e-05
AC005280.3	F2RL1	0.99599	2.40879e-05
AC005280.3	APBA2	0.995989	2.41037e-05
AC005280.3	COLGALT2	-0.99594	2.4693e-05
AC005280.3	CELF6	-0.995844	2.58734e-05
AC005280.3	RASSF8	0.995793	2.65169e-05
AC005280.3	TMEM200A	0.995392	3.17982e-05
AC005280.3	CSF3	0.995385	3.1902e-05
AC005280.3	FRAS1	-0.9953	3.30871e-05
AC005280.3	FJX1	0.995277	3.34011e-05
AC005280.3	IRAK2	0.995248	3.38179e-05
AC005280.3	SCUBE3	0.995198	3.45353e-05
AC005280.3	GAA	-0.995091	3.6094e-05
AC005280.3	GK	0.995044	3.6784e-05
AC005280.3	HAS2	0.994984	3.76711e-05
AC005280.3	COL1A2	-0.994912	3.87616e-05
AC005280.3	ADGRA2	-0.9949	3.89539e-05
AC005280.3	C15orf48	0.994893	3.90501e-05
AC005280.3	HGF	0.994837	3.99175e-05
AC005280.3	TMEM35A	0.994811	4.03196e-05
AC005280.3	NAGS	0.994652	4.28267e-05
AC005280.3	NCAPG	0.994612	4.34733e-05
AC005280.3	GALNT6	0.994544	4.457e-05
AC005280.3	ERCC6L	0.994527	4.48568e-05
AC005280.3	GLIS2	-0.994517	4.50166e-05
AC005280.3	C10orf105	-0.994488	4.54896e-05
AC005280.3	PIM1	-0.994486	4.5517e-05
AC005280.3	RNASET2	-0.994266	4.9225e-05
AC005280.3	VASN	-0.994217	5.00705e-05
AC005280.3	IRS1	-0.994213	5.01346e-05
AC005280.3	FBP1	-0.994198	5.03925e-05
AC005280.3	FMN1	0.994165	5.09797e-05
AC005280.3	TOP2A	0.994135	5.149e-05
AC005280.3	HSPG2	-0.993975	5.4333e-05
AC005280.3	KCTD12	0.993954	5.47121e-05
AC005280.3	FN1	-0.993938	5.50115e-05
AC005280.3	SLC20A1	0.993924	5.52698e-05
AC005280.3	TGFBI	-0.993894	5.5812e-05
AC005280.3	AP002956.1	-0.993855	5.65315e-05
AC005280.3	LIMS2	-0.993814	5.72808e-05
AC005280.3	PODN	-0.993793	5.76647e-05
AC005280.3	COL8A2	-0.99361	6.1111e-05
AC005280.3	RGS17	0.993598	6.13446e-05
AC005280.3	SPHKAP	0.993578	6.17281e-05
AC005280.3	MFAP5	-0.993293	6.73284e-05
AC005280.3	LBH	-0.993252	6.81438e-05
AC005280.3	FBLN2	-0.993251	6.81605e-05
AC005280.3	IL24	0.993177	6.96629e-05
AC005280.3	PTGIS	-0.993107	7.11093e-05
AC005280.3	ETV1	0.993058	7.21174e-05
AC005280.3	ADAMTS2	-0.993043	7.24287e-05
AC005280.3	SOX9	0.993028	7.27409e-05
AC005280.3	RASSF2	-0.992958	7.42018e-05
AC005280.3	PSG4	-0.992922	7.49784e-05
AC005280.3	CRYBG1	0.992807	7.74189e-05
AC005280.3	CREB3L1	-0.992769	7.82415e-05
AC005280.3	TMEM158	0.992729	7.91152e-05
AC005280.3	PSG5	-0.992655	8.07205e-05
AC005280.3	CEBPG	-0.992636	8.11531e-05
AC005280.3	PITPNM2	0.992606	8.18101e-05
AC005280.3	AIM2	0.992492	8.4353e-05
AC005280.3	OSR2	-0.992455	8.51775e-05
AC005280.3	COL1A1	-0.99244	8.55031e-05
AC005280.3	SERTAD4	-0.99238	8.68723e-05
AC005280.3	CENPK	0.992379	8.68969e-05
AC005280.3	FMOD	-0.992352	8.75197e-05
AC005280.3	NATD1	-0.992261	8.96036e-05
AC005280.3	MMP10	0.992203	9.0946e-05
AC005280.3	SLC2A12	-0.99219	9.12538e-05
AC005280.3	SCARA5	0.992171	9.17063e-05
AC005280.3	PLA2G4C	0.992095	9.34963e-05
AC005280.3	RASGRF2	0.991987	9.60476e-05
AC005280.3	ISLR	-0.991917	9.77388e-05
AC005280.3	ISM1	0.991905	9.80291e-05
AC005280.3	SLIT3	-0.991878	9.86783e-05
AC005280.3	CTSF	-0.991875	9.87546e-05
AC005280.3	LMOD1	-0.991734	0.000102213
AC005280.3	VIM	0.99169	0.000103286
AC005280.3	KCNH1	-0.991555	0.000106676
AC005280.3	AMOTL2	-0.99151	0.000107812
AC005280.3	THBS1	-0.991361	0.000111622
AC005280.3	SERPINH1	-0.991352	0.00011186
AC005280.3	DACH1	0.991299	0.000113238
AC005280.3	SULF1	-0.99127	0.000113995
AC005280.3	MYEOV	0.991257	0.000114339
AC005280.3	IFITM10	-0.99125	0.000114517
AC005280.3	XPOT	-0.991245	0.000114639
AC005280.3	TLCD2	-0.991231	0.000115
AC005280.3	SYNPO2	-0.991228	0.000115091
AC005280.3	SERPING1	-0.991206	0.000115671
AC005280.3	DCN	-0.991191	0.000116062
AC005280.3	MKX	-0.991163	0.000116794
AC005280.3	PRC1	0.991122	0.000117866
AC005280.3	SCFD2	0.991121	0.000117897
AC005280.3	TNFRSF6B	0.99111	0.000118204
AC005280.3	COL16A1	-0.991106	0.000118304
AC005280.3	NTNG1	0.991056	0.000119639
AC005280.3	GATA6	-0.991047	0.000119877
AC005280.3	MMP1	0.990994	0.000121308
AC005280.3	MXRA5	-0.990992	0.000121338
AC005280.3	SPAG5	0.990979	0.00012171
AC005280.3	DCSTAMP	0.990978	0.000121726
AC005280.3	SYNPO	-0.99095	0.000122486
AC005280.3	SYPL2	-0.99087	0.000124658
AC005280.3	SELPLG	0.990867	0.000124747
AC005280.3	UGCG	-0.99085	0.0001252
AC005280.3	ADGRD1	-0.990831	0.000125714
AC005280.3	RELT	0.990818	0.000126078
AC005280.3	RAB27B	0.990767	0.000127483
AC005280.3	GPC6	-0.990754	0.000127824
AC005280.3	KCNJ2	-0.990741	0.000128194
AC005280.3	CXCL12	-0.990735	0.00012836
AC005280.3	AKAP12	-0.990732	0.000128445
AC005280.3	PRELP	-0.990732	0.000128458
AC005280.3	MAP3K5	0.99073	0.000128503
AC005280.3	THBS2	-0.990653	0.000130633
AC005280.3	LTBP1	0.990637	0.000131083
AC005280.3	FBLN5	-0.990634	0.00013118
AC005280.3	CTSS	0.990615	0.000131713
AC005280.3	CDH2	-0.990582	0.000132641
AC005280.3	COL10A1	0.990576	0.000132813
AC005280.3	KIZ	-0.990516	0.000134496
AC005280.3	TJP2	0.990504	0.000134822
AC005280.3	SEMA3C	-0.990503	0.000134869
AC005280.3	MRVI1	-0.990476	0.000135626
AC005280.3	ST3GAL5	0.990438	0.000136724
AC005280.3	SMAGP	0.990411	0.000137481
AC005280.3	CAVIN2	0.99039	0.000138094
AC005280.3	MAMLD1	-0.990328	0.000139864
AC005280.3	ICOSLG	0.990303	0.000140598
AC005280.3	NES	0.990239	0.000142463
AC005280.3	CEP55	0.990233	0.00014263
AC005280.3	PMP22	-0.99023	0.000142718
AC005280.3	ANOS1	0.99023	0.000142719
AC005280.3	RNF150	-0.990228	0.000142779
AC005280.3	PODNL1	-0.990169	0.000144496
AC005280.3	LAMA2	-0.990163	0.000144681
AC005280.3	ITGA2	0.990159	0.000144781
AC005280.3	TNFRSF21	0.990112	0.000146169
AC005280.3	CENPF	0.990103	0.000146443
AC005280.3	MUC1	-0.990096	0.000146648
AC005280.3	MFAP4	-0.990094	0.000146715
AC005280.3	CORO2B	0.990088	0.000146878
AC005280.3	CLSTN2	-0.990076	0.000147231
AC005280.3	S1PR3	-0.990055	0.000147876
AC005280.3	PCK2	-0.990038	0.000148361
AC005280.3	CD59	0.99003	0.000148604
AC005280.3	SEMA7A	0.990009	0.000149223
AC005280.3	ALDH1A1	-0.989999	0.000149529
AC005280.3	ASF1B	0.989916	0.00015201
AC005280.3	ETHE1	-0.989906	0.000152323
AC005280.3	LRRC8C	0.989887	0.000152885
AC005280.3	ASNS	-0.989869	0.000153429
AC005280.3	PRAG1	-0.989846	0.000154126
AC005280.3	FBN2	-0.989842	0.000154253
AC005280.3	COL3A1	-0.989838	0.000154382
AC005280.3	COL11A1	-0.989836	0.000154435
AC005280.3	ITGB8	-0.989816	0.000155056
AC005280.3	ARHGAP28	-0.989767	0.000156551
AC005280.3	COL4A1	-0.989712	0.000158213
AC005280.3	CRISPLD2	-0.989701	0.000158567
AC005280.3	ARHGAP22	0.989696	0.000158711
AC005280.3	TBC1D2	-0.989676	0.00015934
AC005280.3	ITGA6	0.989642	0.00016037
AC005280.3	VSIR	-0.989638	0.0001605
AC005280.3	MYL9	-0.989626	0.000160872
AC005280.3	SLC1A4	-0.989604	0.000161545
AC005280.3	SEMA3D	-0.989494	0.00016498
AC005280.3	PYCR1	-0.989481	0.000165401
AC005280.3	ABCC9	-0.989463	0.000165955
AC005280.3	TAGLN	-0.989442	0.000166603
AC005280.3	COL5A1	-0.989431	0.000166976
AC005280.3	DCLK2	-0.989429	0.00016703
AC005280.3	TINAGL1	-0.989425	0.000167149
AC005280.3	GLUL	0.989396	0.000168057
AC005280.3	TPM1	-0.989394	0.00016815
AC005280.3	SEMA5A	-0.989391	0.000168224
AC005280.3	FZD7	-0.98937	0.000168884
AC005280.3	A2M	-0.989363	0.000169108
AC005280.3	RARRES2	-0.989332	0.000170087
AC005280.3	PCSK9	-0.989331	0.000170142
AC005280.3	GABARAPL1	-0.989325	0.000170327
AC005280.3	SLC7A5	-0.989303	0.000171021
AC005280.3	CHRM2	-0.989275	0.000171906
AC005280.3	PLPPR4	-0.989235	0.0001732
AC005280.3	DDIT3	-0.989197	0.00017443
AC005280.3	CASP10	0.989142	0.000176204
AC005280.3	PEAR1	-0.989126	0.000176731
AC005280.3	IGFBP5	-0.989109	0.000177291
AC005280.3	NTN4	-0.989083	0.000178119
AC005280.3	ADM	-0.989031	0.000179816
AC005280.3	CA12	0.989021	0.000180153
AC005280.3	RDH10	-0.988982	0.000181424
AC005280.3	EGR2	-0.988908	0.000183881
AC005280.3	MARS	-0.988845	0.000185953
AC005280.3	FSTL3	-0.988812	0.000187069
AC005280.3	PHLDA1	0.988811	0.000187098
AC005280.3	EVI2A	0.988791	0.000187765
AC005280.3	NRIP3	0.988681	0.000191446
AC005280.3	KIAA1549L	0.988615	0.0001937
AC005280.3	PFKFB3	0.988602	0.000194126
AC005280.3	NTF3	-0.988576	0.000195003
AC005280.3	PCDH7	-0.988558	0.000195617
AC005280.3	FMO4	-0.988548	0.000195968
AC005280.3	TTC9	-0.988547	0.00019602
AC005280.3	PRSS3	0.988516	0.000197054
AC005280.3	NFIX	-0.988507	0.000197362
AC005280.3	SLC6A9	-0.988461	0.000198944
AC005280.3	TUFT1	-0.988448	0.000199408
AC005280.3	ALCAM	-0.988431	0.000199976
AC005280.3	CNIH3	0.988416	0.000200506
AC005280.3	RAPH1	-0.98839	0.000201403
AC005280.3	ALDH3B1	-0.988369	0.000202138
AC005280.3	ALPK2	-0.988325	0.000203647
AC005280.3	KIF26B	-0.988325	0.000203652
AC005280.3	GAB2	-0.988255	0.00020612
AC005280.3	FNDC1	-0.988255	0.000206122
AC005280.3	PKM	0.988247	0.000206379
AC005280.3	EFEMP1	-0.988236	0.000206775
AC005280.3	KL	-0.988232	0.000206906
AC005280.3	FAT4	-0.98823	0.000206986
AC005280.3	PHKA1	0.988178	0.000208827
AC005280.3	PSAT1	-0.988167	0.000209217
AC005280.3	SH2B3	0.988162	0.000209383
AC005280.3	TRIB3	-0.988153	0.000209683
AC005280.3	SPARC	-0.98809	0.00021194
AC005280.3	ANKRD33B	-0.988034	0.000213914
AC005280.3	COL4A2	-0.988033	0.000213956
AC005280.3	PLAU	0.987985	0.00021568
AC005280.3	DKK1	-0.987978	0.000215909
AC005280.3	ARHGAP6	0.987948	0.000217007
AC005280.3	SLC24A3	0.987902	0.000218662
AC005280.3	MGP	-0.987791	0.000222696
AC005280.3	TACSTD2	-0.987788	0.000222783
AC005280.3	RFX8	0.987783	0.000222958
AC005280.3	PRRX1	0.98769	0.000226363
AC005280.3	TUBB3	0.987646	0.000227996
AC005280.3	KCND3	-0.987642	0.000228137
AC005280.3	EREG	0.987605	0.00022951
AC005280.3	CD68	0.987484	0.000233994
AC005280.3	KRTAP1-5	-0.987478	0.000234208
AC005280.3	SH3BP5	-0.987472	0.00023443
AC005280.3	HS3ST3A1	0.987425	0.000236202
AC005280.3	SOCS2	0.987418	0.000236475
AC005280.3	FAP	-0.987415	0.000236571
AC005280.3	WNT5A	-0.987414	0.000236618
AC005280.3	RHOBTB3	-0.987409	0.000236794
AC005280.3	RAC2	0.987382	0.000237814
AC005280.3	LRRC15	-0.987367	0.000238392
AC005280.3	ZBED3	-0.987359	0.000238682
AC005280.3	KIF14	0.987331	0.00023975
AC005280.3	PLEKHH2	-0.987306	0.000240694
AC005280.3	ATF4	-0.987301	0.000240886
AC005280.3	KCNMA1	0.987258	0.000242496
AC005280.3	VCAM1	-0.987253	0.000242678
AC005280.3	VGLL3	-0.987248	0.000242898
AC005280.3	KLF4	-0.987243	0.000243086
AC005280.3	SEMA3B	-0.987228	0.000243626
AC005280.3	PHGDH	-0.987207	0.00024444
AC005280.3	CD34	-0.987188	0.00024517
AC005280.3	WNT2	-0.987162	0.000246162
AC005280.3	NUF2	0.98716	0.000246249
AC005280.3	SVEP1	-0.987155	0.000246417
AC005280.3	DAAM2	-0.987092	0.000248847
AC005280.3	AMPD3	0.987081	0.000249282
AC005280.3	ANLN	0.987023	0.000251498
AC005280.3	GPM6B	0.987008	0.000252078
AC005280.3	LMCD1	-0.986941	0.00025469
AC005280.3	NUPR1	-0.986756	0.000261926
AC005280.3	CPZ	-0.986731	0.000262935
AC005280.3	DUSP4	0.986727	0.000263081
AC005280.3	TOX	-0.986688	0.000264638
AC005280.3	MMP24	-0.986662	0.00026565
AC005280.3	BCAM	-0.98666	0.000265766
AC005280.3	NTM	0.986642	0.000266471
AC005280.3	CXXC5	-0.986566	0.000269505
AC005280.3	VDR	-0.98654	0.000270543
AC005280.3	SPRY4	0.986508	0.000271811
AC005280.3	TRAM2	0.986461	0.000273733
AC005280.3	FHL1	-0.986442	0.000274472
AC005280.3	BUB1B	0.986386	0.000276759
AC005280.3	TPX2	0.986383	0.000276869
AC005280.3	CYP1B1	-0.986306	0.000279985
AC005280.3	EGR3	-0.986276	0.000281239
AC005280.3	TSPAN14	0.986265	0.000281669
AC005280.3	SORBS2	-0.986254	0.000282116
AC005280.3	NUAK1	-0.986253	0.000282159
AC005280.3	SYTL5	-0.98617	0.000285588
AC005280.3	VWA5A	0.98605	0.000290537
AC005280.3	GXYLT2	-0.986021	0.000291771
AC005280.3	NPAS1	-0.985885	0.00029743
AC005280.3	PDE1C	-0.985831	0.00029972
AC005280.3	FSTL1	-0.985814	0.000300429
AC005280.3	TMEM26	0.985808	0.000300693
AC005280.3	SLC8A1	-0.985772	0.000302228
AC005280.3	FP565260.3	0.985688	0.000305767
AC005280.3	RAMP1	-0.985683	0.000306
AC005280.3	PRSS12	-0.985679	0.000306159
AC005280.3	RHBDF2	0.985674	0.000306398
AC005280.3	RAB27A	0.985657	0.000307125
AC005280.3	EPDR1	-0.985638	0.000307932
AC005280.3	PDGFD	-0.985596	0.000309724
AC005280.3	STC2	-0.985592	0.000309911
AC005280.3	GRIA1	-0.985521	0.000312938
AC005280.3	CDCP1	0.985517	0.000313108
AC005280.3	ANO3	-0.985516	0.000313146
AC005280.3	HMMR	0.985466	0.000315318
AC005280.3	DLGAP5	0.985463	0.000315434
AC005280.3	ADAMTS1	-0.985461	0.000315545
AC005280.3	SLC3A2	-0.98543	0.000316893
AC005280.3	DAPK1	-0.985409	0.000317798
AC005280.3	SLC40A1	-0.985392	0.000318515
AC005280.3	LOX	-0.985303	0.00032242
AC005280.3	SLC7A11	-0.985282	0.000323348
AC005280.3	ADAMTSL5	-0.985261	0.000324276
AC005280.3	HPCAL1	0.985234	0.000325443
AC005280.3	INA	0.985219	0.000326083
AC005280.3	GABRE	-0.985218	0.000326157
AC005280.3	ABLIM3	0.985202	0.000326844
AC005280.3	RGMA	-0.98519	0.000327362
AC005280.3	AC005747.1	-0.98515	0.000329125
AC005280.3	SULF2	-0.985112	0.00033083
AC005280.3	FEN1	0.985108	0.000331007
AC005280.3	ACTG2	-0.985108	0.000331017
AC005280.3	NCEH1	0.985095	0.000331572
AC005280.3	ENOX1	-0.98503	0.000334466
AC005280.3	MAP2	-0.985024	0.000334736
AC005280.3	JPH2	-0.984966	0.000337348
AC005280.3	SLC38A1	-0.984941	0.000338474
AC005280.3	PKP4	-0.984876	0.000341356
AC005280.3	CTSH	-0.984849	0.00034258
AC005280.3	ID2	-0.984799	0.000344861
AC005280.3	CORIN	-0.984734	0.000347792
AC005280.3	C1QBP	0.984718	0.000348508
AC005280.3	FOXQ1	0.984645	0.000351832
AC005280.3	TMEM51	0.984639	0.000352129
AC005280.3	SPINT2	-0.984626	0.000352732
AC005280.3	CCDC80	-0.98461	0.000353449
AC005280.3	CCN2	-0.984497	0.000358661
AC005280.3	CSRP2	-0.984389	0.000363639
AC005280.3	PTGS1	0.984374	0.000364361
AC005280.3	IGFBP3	-0.98434	0.000365954
AC005280.3	IL33	0.984337	0.000366086
AC005280.3	ADGRA3	0.984314	0.000367153
AC005280.3	DHRS3	-0.984286	0.000368441
AC005280.3	IRS2	-0.984275	0.000368989
AC005280.3	WARS	-0.984249	0.000370182
AC005280.3	ITIH5	-0.984242	0.000370538
AC005280.3	NEDD9	-0.984166	0.0003741
AC005280.3	TPD52L1	-0.983988	0.000382538
AC005280.3	ADM2	-0.983929	0.000385326
AC005280.3	CITED2	-0.98392	0.00038577
AC005280.3	SNHG32	-0.983919	0.000385802
AC005280.3	MSX1	0.983905	0.000386498
AC005280.3	PNP	0.983831	0.000390055
AC005280.3	F3	-0.983799	0.0003916
AC005280.3	PRXL2A	0.983796	0.000391734
AC005280.3	GPRIN1	0.983788	0.000392121
AC005280.3	ANGPT1	-0.98373	0.000394938
AC005280.3	CNN1	-0.983654	0.000398624
AC005280.3	TNC	0.98364	0.000399277
AC005280.3	CTH	-0.983596	0.000401428
AC005280.3	STC1	0.98354	0.000404186
AC005280.3	ROR1	-0.983535	0.000404432
AC005280.3	CCDC102B	0.983532	0.000404559
AC005280.3	FOXO1	-0.983509	0.0004057
AC005280.3	FILIP1L	0.983504	0.000405914
AC005280.3	KRT34	-0.983497	0.000406287
AC005280.3	C1S	-0.983475	0.000407335
AC005280.3	WNT2B	-0.983428	0.000409666
AC005280.3	CAMKMT	0.983416	0.000410282
AC005280.3	ACTA2	-0.983398	0.000411173
AC005280.3	SAMD5	-0.983375	0.000412289
AC005280.3	FHDC1	-0.983372	0.000412418
AC005280.3	MINDY4	0.983371	0.000412493
AC005280.3	FOSB	-0.983351	0.000413467
AC005280.3	ADAMTS5	-0.983299	0.000416051
AC005280.3	LIMCH1	-0.983242	0.000418886
AC005280.3	ISG20	0.983238	0.000419093
AC005280.3	IL1B	0.983197	0.000421154
AC005280.3	RGS4	0.983124	0.000424799
AC005280.3	FOXC1	-0.983122	0.000424885
AC005280.3	EXPH5	-0.983108	0.00042562
AC005280.3	EHD3	0.983102	0.000425878
AC005280.3	LIPG	0.983091	0.000426473
AC005280.3	GSTO1	0.983061	0.000427987
AC005280.3	MTHFD1L	-0.983018	0.00043013
AC005280.3	EFHD1	-0.983014	0.000430336
AC005280.3	GDF7	-0.98296	0.00043307
AC005280.3	PLAT	0.98293	0.000434599
AC005280.3	TNXB	-0.982919	0.000435161
AC005280.3	RNF227	-0.982906	0.000435785
AC005280.3	IGF2	-0.982877	0.000437283
AC005280.3	MEF2C	0.982864	0.00043795
AC005280.3	APOBEC3B	0.982852	0.000438584
AC005280.3	PDE8B	-0.982847	0.000438837
AC005280.3	WNK4	0.982835	0.000439437
AC005280.3	ZNF469	-0.982832	0.000439565
AC005280.3	NTSR1	0.982817	0.000440352
AC005280.3	TOMM34	0.982763	0.000443107
AC005280.3	GREM2	0.982763	0.000443118
AC005280.3	HMCN1	-0.982735	0.000444543
AC005280.3	STMN3	0.982687	0.000446997
AC005280.3	LRIG3	-0.982687	0.000447011
AC005280.3	GPRC5A	-0.982686	0.000447079
AC005280.3	EFL1	0.982611	0.000450939
AC005280.3	FHOD1	0.982584	0.000452331
AC005280.3	NRXN3	-0.982513	0.000456002
AC005280.3	PXDC1	-0.982511	0.000456117
AC005280.3	SLC37A2	0.982472	0.000458165
AC005280.3	CPNE2	0.982444	0.000459619
AC005280.3	SH3BGRL3	0.982366	0.000463675
AC005280.3	PBK	0.982349	0.000464561
AC005280.3	MITF	-0.982308	0.000466754
AC005280.3	MEGF6	-0.982285	0.000467964
AC005280.3	INHBA	-0.982275	0.000468454
AC005280.3	PAMR1	0.982274	0.000468554
AC005280.3	STX1A	0.982192	0.00047288
AC005280.3	AHNAK2	0.982099	0.000477803
AC005280.3	PNMA2	-0.982092	0.000478153
AC005280.3	AMIGO2	-0.982073	0.000479164
AC005280.3	COL12A1	-0.98207	0.000479358
AC005280.3	IQCD	0.981926	0.000487041
AC005280.3	TUB	-0.981821	0.000492696
AC005280.3	RNF41	-0.981772	0.000495386
AC005280.3	PLK2	-0.981727	0.000497828
AC005280.3	NCKAP5	-0.981718	0.000498296
AC005280.3	G0S2	0.981664	0.000501209
AC005280.3	ARHGAP24	0.981618	0.000503768
AC005280.3	WFDC1	-0.981532	0.000508425
AC005280.3	BDNF	-0.981453	0.000512816
AC005280.3	ELK3	0.981383	0.000516648
AC005280.3	SQOR	0.98134	0.00051906
AC005280.3	CFD	-0.981297	0.000521429
AC005280.3	MGAT5	0.98126	0.000523469
AC005280.3	NOG	0.981237	0.000524771
AC005280.3	CCL11	-0.981215	0.000526026
AC005280.3	GFRA1	-0.981207	0.000526471
AC005280.3	FIBIN	-0.981188	0.000527484
AC005280.3	TMEM47	-0.981147	0.000529802
AC005280.3	RGS5	0.981145	0.000529899
AC005280.3	ABHD17C	0.981125	0.00053104
AC005280.3	CNIH2	0.981051	0.000535214
AC005280.3	NBL1	0.981042	0.000535728
AC005280.3	CPA4	-0.981036	0.000536058
AC005280.3	TMTC1	-0.98098	0.000539187
AC005280.3	RITA1	0.980955	0.000540624
AC005280.3	OFD1	0.980932	0.000541897
AC005280.3	CASP1	0.980906	0.000543397
AC005280.3	JDP2	-0.980846	0.000546821
AC005280.3	VEPH1	0.980773	0.000550936
AC005280.3	PTHLH	-0.980759	0.000551749
AC005280.3	FZD8	0.980738	0.000552982
AC005280.3	FAM20C	0.980687	0.000555867
AC005280.3	FBN1	-0.980591	0.000561389
AC005280.3	ALDH1L2	-0.980558	0.000563287
AC005280.3	ITGBL1	-0.98052	0.000565498
AC005280.3	GASK1B	-0.980475	0.000568106
AC005280.3	PARD3B	-0.980385	0.00057336
AC005280.3	SHCBP1	0.980384	0.000573415
AC005280.3	TCAF2	0.98033	0.000576569
AC005280.3	NREP	-0.980288	0.000578994
AC005280.3	PRICKLE1	-0.98015	0.000587146
AC005280.3	COBLL1	-0.980079	0.000591301
AC005280.3	CEP170	0.980066	0.000592088
AC005280.3	CHST2	0.980048	0.000593125
AC005280.3	OXTR	-0.980036	0.000593876
AC005280.3	SYT1	-0.979982	0.000597079
AC005280.3	SRD5A2	0.979965	0.000598108
AC005280.3	TAFA5	-0.979941	0.000599491
AC005280.3	BACH2	0.979848	0.000605048
AC005280.3	OVCH2	0.979817	0.000606945
AC005280.3	NPR3	-0.979807	0.000607493
AC005280.3	KREMEN1	0.979755	0.000610627
AC005280.3	TM4SF1	0.979744	0.000611326
AC005280.3	C1R	-0.979699	0.00061401
AC005280.3	TENM2	-0.979614	0.000619127
AC005280.3	GTSE1	0.979557	0.000622608
AC005280.3	OLR1	-0.979513	0.000625294
AC005280.3	PREX2	-0.979483	0.000627119
AC005280.3	IL1R1	0.979455	0.000628786
AC005280.3	C17orf53	0.97938	0.00063337
AC005280.3	GPRC5B	-0.979378	0.000633522
AC005280.3	C1orf198	-0.979349	0.000635311
AC005280.3	TMEM52B	-0.979326	0.000636711
AC005280.3	H1F0	0.979212	0.00064371
AC005280.3	NXPH4	0.979153	0.000647346
AC005280.3	BST1	-0.979076	0.00065217
AC005280.3	PSG9	-0.979025	0.00065533
AC005280.3	COL15A1	-0.978996	0.000657149
AC005280.3	PITPNC1	0.978956	0.00065962
AC005280.3	BMP1	-0.978925	0.000661559
AC005280.3	STXBP6	-0.978909	0.000662561
AC005280.3	TRIM16L	-0.978892	0.000663613
AC005280.3	CCND1	0.978876	0.000664646
AC005280.3	CYP26B1	0.978861	0.00066555
AC005280.3	KCNMB4	-0.978804	0.00066916
AC005280.3	PDGFA	-0.978735	0.000673501
AC005280.3	ANPEP	0.978722	0.00067433
AC005280.3	MMP16	0.978664	0.00067801
AC005280.3	MAB21L1	-0.97858	0.000683314
AC005280.3	ADAMTS10	-0.978478	0.000689833
AC005280.3	RACGAP1	0.978469	0.000690375
AC005280.3	TFAP2C	0.978435	0.000692569
AC005280.3	HMGA1	0.978412	0.000694005
AC005280.3	IQCN	-0.978393	0.000695224
AC005280.3	WWTR1	0.978367	0.000696944
AC005280.3	WNT9A	0.978332	0.000699176
AC005280.3	GPLD1	-0.978276	0.000702794
AC005280.3	CMKLR1	0.978211	0.000706991
AC005280.3	KIF4A	0.97818	0.000708969
AC005280.3	DUSP1	-0.978081	0.000715377
AC005280.3	XKRX	0.977993	0.000721114
AC005280.3	FZD1	0.977933	0.000725026
AC005280.3	MTCL1	-0.977868	0.000729349
AC005280.3	PDE7B	0.977863	0.000729641
AC005280.3	SGCD	-0.977849	0.000730587
AC005280.3	PDE5A	-0.977822	0.000732319
AC005280.3	SLC16A6	0.97781	0.000733102
AC005280.3	PLCXD3	0.977796	0.000734066
AC005280.3	BAALC	0.977791	0.000734413
AC005280.3	SBSPON	-0.977727	0.000738587
AC005280.3	PKIA	0.977665	0.00074268
AC005280.3	ADORA2A	0.97761	0.00074635
AC005280.3	KLF2	-0.977595	0.000747349
AC005280.3	MTHFD2	-0.977583	0.000748146
AC005280.3	ASS1	0.977487	0.000754558
AC005280.3	AKR1B1	0.977449	0.00075709
AC005280.3	MYH15	0.977418	0.000759162
AC005280.3	FERMT2	-0.977416	0.000759304
AC005280.3	PGRMC2	-0.977396	0.000760621
AC005280.3	CENPX	0.977394	0.00076079
AC005280.3	CITED4	0.97737	0.000762357
AC005280.3	NUSAP1	0.977313	0.000766225
AC005280.3	KRT4	-0.977212	0.000773
AC005280.3	TRPV2	0.977072	0.000782519
AC005280.3	CBSL	-0.977032	0.000785258
AC005280.3	EPHX4	0.977014	0.000786478
AC005280.3	CLIC3	-0.976966	0.000789737
AC005280.3	ARRDC4	-0.97687	0.000796297
AC005280.3	CPN2	-0.976748	0.000804676
AC005280.3	LRRC32	-0.976696	0.00080832
AC005280.3	SMTN	0.976682	0.000809286
AC005280.3	CIT	0.976596	0.000815201
AC005280.3	MAP2K6	-0.976505	0.000821512
AC005280.3	NET1	0.976457	0.000824882
AC005280.3	RNF152	0.976417	0.000827657
AC005280.3	DLL4	0.976392	0.000829397
AC005280.3	PLXNC1	-0.976372	0.000830819
AC005280.3	TMEM130	-0.976357	0.000831874
AC005280.3	NDUFA4L2	-0.976223	0.000841316
AC005280.3	CXCL14	-0.976191	0.000843583
AC005280.3	MATN2	-0.976045	0.00085388
AC005280.3	NBPF3	-0.976027	0.000855202
AC005280.3	CSDC2	-0.976021	0.000855592
AC005280.3	DRP2	0.97598	0.000858486
AC005280.3	FOXM1	0.975977	0.000858696
AC005280.3	RGS3	0.975939	0.000861429
AC005280.3	LAMB3	0.975757	0.00087445
AC005280.3	ABHD2	0.975747	0.000875153
AC005280.3	SLC7A8	0.975662	0.000881333
AC005280.3	GPR26	0.975566	0.000888203
AC005280.3	CHEK1	0.975474	0.000894917
AC005280.3	UBL4B	-0.975405	0.000899902
AC005280.3	VIT	-0.975373	0.000902282
AC005280.3	PTPRQ	-0.975352	0.000903823
AC005280.3	AARD	-0.975278	0.000909233
AC005280.3	C17orf107	-0.975239	0.000912102
AC005280.3	CRYBA1	0.975218	0.000913617
AC005280.3	CCL26	0.975132	0.000919929
AC005280.3	S100A16	0.974904	0.000936831
AC005280.3	ELN	-0.974785	0.000945662
AC005280.3	LPXN	0.97469	0.000952802
AC005280.3	AJUBA	-0.974688	0.000952914
AC005280.3	MAP7	0.974615	0.000958433
AC005280.3	MT2A	0.974516	0.000965872
AC005280.3	ENPEP	-0.974499	0.000967144
AC005280.3	PRR16	0.974499	0.000967177
AC005280.3	TFB1M	0.974379	0.00097625
AC005280.3	IL4R	0.974362	0.000977529
AC005280.3	ORAI1	0.974339	0.000979317
AC005280.3	CCN1	-0.974319	0.000980817
AC005280.3	TMSB15A	0.97426	0.000985304
AC005280.3	UNC79	-0.974187	0.000990865
AC005280.3	DUSP7	0.974179	0.000991492
AC005280.3	PLK1	0.974028	0.00100307
AC005280.3	EGR1	-0.973886	0.001014
AC005280.3	SACS	0.973695	0.00102879
AC005280.3	B4GALT4	-0.973654	0.00103205
AC005280.3	IL20RB	-0.97356	0.00103935
AC005280.3	MARK1	-0.9735	0.00104404
AC005280.3	RNF24	0.973485	0.00104525
AC005280.3	PTK2B	-0.973381	0.00105339
AC005280.3	SPTB	0.973337	0.00105692
AC005280.3	TSPAN13	0.973329	0.00105752
AC005280.3	FMNL3	0.973258	0.00106312
AC005280.3	EHBP1	-0.973243	0.00106435
AC005280.3	FAM20A	0.973157	0.00107118
AC005280.3	SKA3	0.973122	0.00107389
AC005280.3	SDCCAG8	0.973003	0.00108345
AC005280.3	PIK3R6	0.972982	0.00108509
AC005280.3	COL13A1	0.97297	0.00108609
AC005280.3	ADRA1D	0.972969	0.0010861
AC005280.3	TPCN1	0.972841	0.00109641
AC005280.3	ZC3H12C	0.972792	0.00110035
AC005280.3	NIPAL4	-0.97276	0.0011029
AC005280.3	DAB1	-0.97276	0.0011029
AC005280.3	GALE	0.972661	0.00111088
AC005280.3	FOS	-0.972636	0.00111294
AC005280.3	FMNL2	0.972635	0.00111305
AC005280.3	ROR2	-0.972533	0.00112129
AC005280.3	RHOBTB1	-0.972488	0.00112496
AC005280.3	CLEC3B	-0.972484	0.00112525
AC005280.3	ADAMTS14	0.972463	0.00112697
AC005280.3	RAP1GAP	-0.972323	0.0011384
AC005280.3	NRGN	0.972323	0.00113845
AC005280.3	CXCL8	0.972308	0.00113966
AC005280.3	TBC1D8	0.97227	0.00114275
AC005280.3	BAMBI	-0.972039	0.00116177
AC005280.3	TRPC6	-0.971942	0.00116984
AC005280.3	RAPGEF2	-0.971846	0.00117783
AC005280.3	GDPD5	-0.971844	0.00117801
AC005280.3	PREX1	0.971832	0.001179
AC005280.3	GRAMD2B	-0.971717	0.00118854
AC005280.3	FAM171A2	-0.97164	0.00119504
AC005280.3	TRPA1	0.971602	0.00119822
AC005280.3	HID1	0.971489	0.00120775
AC005280.3	PHLDA2	0.971488	0.00120785
AC005280.3	UHRF1	0.971473	0.00120906
AC005280.3	AC068580.4	-0.971463	0.00120994
AC005280.3	E2F7	0.971417	0.00121379
AC005280.3	PDE3A	-0.971372	0.00121759
AC005280.3	KRT33B	-0.971335	0.00122078
AC005280.3	AK5	0.971324	0.00122171
AC005280.3	CLUL1	-0.971287	0.0012248
AC005280.3	SCN1A	-0.971253	0.0012277
AC005280.3	NR4A3	0.971104	0.00124037
AC005280.3	MYO5A	0.971097	0.00124099
AC005280.3	POU2F2	0.970906	0.00125741
AC005280.3	DACT1	-0.97087	0.00126046
AC005280.3	FGFR3	-0.970864	0.001261
AC005280.3	BICC1	-0.970828	0.00126406
AC005280.3	KIF20A	0.970807	0.00126587
AC005280.3	SOGA3	0.970687	0.00127626
AC005280.3	GRIK2	-0.970608	0.00128314
AC005280.3	FZD4	-0.970601	0.00128371
AC005280.3	JCHAIN	-0.970578	0.00128572
AC005280.3	SIX2	-0.970554	0.00128781
AC005280.3	KIAA1217	0.97051	0.00129165
AC005280.3	DBP	-0.970474	0.0012948
AC005280.3	ETV4	0.970425	0.00129906
AC005280.3	PTTG1	0.970303	0.00130978
AC005280.3	ECI1	-0.970194	0.00131933
AC005280.3	LGI4	-0.970102	0.00132746
AC005280.3	HSD11B1	0.970091	0.00132847
AC005280.3	AC010616.1	-0.969945	0.00134136
AC005280.3	IGF2BP3	0.969786	0.00135558
AC005280.3	RPS6KA2	-0.969686	0.00136451
AC005280.3	C1QTNF5	-0.969655	0.00136727
AC005280.3	PITPNM3	-0.969603	0.0013719
AC005280.3	SCN9A	-0.969529	0.00137861
AC005280.3	CAMK1G	0.969489	0.00138214
AC005280.3	PLCE1	-0.969446	0.00138604
AC005280.3	BRINP1	-0.969403	0.00138994
AC005280.3	PLAC8	-0.969252	0.00140365
AC005280.3	ADGRB2	-0.969245	0.00140423
AC005280.3	SFRP4	-0.969108	0.00141675
AC005280.3	MKI67	0.969061	0.00142103
AC005280.3	THEMIS2	0.96887	0.00143855
AC005280.3	TM6SF2	-0.968701	0.00145415
AC005280.3	RUNX1	-0.968654	0.00145847
AC005280.3	GPR132	-0.968641	0.00145968
AC005280.3	BUB1	0.968625	0.00146117
AC005280.3	DTL	0.96843	0.00147924
AC005280.3	IGSF10	-0.968381	0.00148382
AC005280.3	PSG1	-0.968348	0.00148691
AC005280.3	NEGR1	-0.968262	0.00149496
AC005280.3	TRIB2	0.968245	0.00149655
AC005280.3	RAB7B	-0.968242	0.00149684
AC005280.3	PXDNL	0.968064	0.00151362
AC005280.3	BOC	-0.968062	0.00151377
AC005280.3	TMEM171	0.968058	0.00151414
AC005280.3	ADAM33	-0.968018	0.00151794
AC005280.3	GAL	0.967889	0.00153011
AC005280.3	KCTD15	-0.96779	0.00153954
AC005280.3	PLSCR4	-0.96773	0.00154525
AC005280.3	SPC24	0.967541	0.0015633
AC005280.3	CD82	0.967466	0.00157047
AC005280.3	HAUS7	-0.967428	0.00157413
AC005280.3	MEST	-0.967348	0.00158184
AC005280.3	POSTN	-0.967322	0.00158429
AC005280.3	LYPD1	-0.967293	0.00158718
AC005280.3	PLAUR	0.967172	0.00159884
AC005280.3	WNT7B	0.967126	0.00160329
AC005280.3	RAP1GAP2	0.967082	0.00160753
AC005280.3	SMAD6	-0.967067	0.00160903
AC005280.3	SLCO4A1	0.967042	0.00161148
AC005280.3	MAPKBP1	0.966927	0.00162264
AC005280.3	SLC10A6	0.966918	0.00162353
AC005280.3	SDC2	-0.96679	0.00163606
AC005280.3	CKAP2L	0.966719	0.00164302
AC005280.3	SAMD3	0.966516	0.00166298
AC005280.3	ITGA10	0.966447	0.00166986
AC005280.3	HTR2B	-0.966288	0.00168555
AC005280.3	DLC1	-0.965945	0.00171987
AC005280.3	ADIRF	0.965768	0.00173765
AC005280.3	AL049629.2	0.965747	0.0017398
AC005280.3	CBS	-0.965627	0.00175197
AC005280.3	HNMT	-0.965507	0.0017641
AC005280.3	RIPOR3	0.965393	0.00177575
AC005280.3	CCNB2	0.965365	0.00177864
AC005280.3	ENTPD7	-0.965361	0.001779
AC005280.3	ZNF792	0.965318	0.00178341
AC005280.3	POP1	0.965205	0.00179498
AC005280.3	GBP1	-0.965202	0.00179526
AC005280.3	CRACR2A	0.965011	0.00181492
AC005280.3	ADGRG6	-0.964983	0.00181778
AC005280.3	SYT7	0.964961	0.00182012
AC005280.3	GDF5	-0.96466	0.00185127
AC005280.3	FIBCD1	0.964521	0.00186586
AC005280.3	BIRC5	0.964464	0.0018718
AC005280.3	OLFML2B	0.964385	0.00188005
AC005280.3	CLCA2	0.964377	0.00188094
AC005280.3	ADAM12	-0.964322	0.00188672
AC005280.3	SLC38A11	-0.964114	0.00190864
AC005280.3	SMPDL3A	-0.964078	0.00191242
AC005280.3	SMAD9	-0.963898	0.00193154
AC005280.3	SELENOP	-0.963852	0.00193645
AC005280.3	PLCD4	0.963715	0.00195096
AC005280.3	GPR68	0.963686	0.00195408
AC005280.3	KIF2C	0.963525	0.00197134
AC005280.3	PALM	-0.963467	0.00197756
AC005280.3	PTGDS	-0.963324	0.00199306
AC005280.3	PCDH10	-0.963181	0.00200853
AC005280.3	LIN7A	-0.96315	0.00201188
AC005280.3	GADD45B	-0.963134	0.00201364
AC005280.3	MAP6	-0.96306	0.00202161
AC005280.3	PLPP4	-0.96306	0.00202167
AC005280.3	CDCA8	0.963044	0.00202341
AC005280.3	MSLN	-0.96295	0.0020336
AC005280.3	CCN5	-0.962662	0.00206512
AC005280.3	SLC14A1	0.962576	0.00207463
AC005280.3	DNER	0.962542	0.00207836
AC005280.3	GLRB	-0.962278	0.00210758
AC005280.3	CD200	-0.962266	0.00210889
AC005280.3	NRROS	0.96225	0.00211065
AC005280.3	C3AR1	0.962091	0.00212837
AC005280.3	MLPH	0.96205	0.00213302
AC005280.3	PLEKHA6	-0.962011	0.00213738
AC005280.3	GUCY1A2	-0.961919	0.00214759
AC005280.3	LY6K	0.961885	0.00215144
AC005280.3	NHSL2	0.961807	0.00216016
AC005280.3	LRATD2	0.961782	0.00216304
AC005280.3	RNF157	0.961755	0.00216603
AC005280.3	GPD2	0.961589	0.00218473
AC005280.3	ATF3	-0.961476	0.00219757
AC005280.3	CST1	0.961428	0.00220295
AC005280.3	KLF5	-0.961319	0.00221542
AC005280.3	ADRB2	0.961303	0.00221717
AC005280.3	LYPD6	-0.961161	0.00223344
AC005280.3	ADGRL2	-0.96115	0.00223462
AC005280.3	ST8SIA5	0.960825	0.0022719
AC005280.3	MYO7B	0.960781	0.00227708
AC005280.3	HLA-DMA	-0.960507	0.00230878
AC005280.3	EDN1	-0.960364	0.00232542
AC005280.3	CARMIL1	-0.960106	0.00235554
AC005280.3	RASGRP1	-0.960065	0.00236035
AC005280.3	FERMT1	0.959964	0.00237224
AC005280.3	TOX2	0.95994	0.00237508
AC005280.3	LRP8	0.959561	0.00241985
AC005280.3	RAB37	0.959457	0.00243229
AC005280.3	AC244197.3	-0.959416	0.0024372
AC005280.3	RRM2	0.959306	0.00245027
AC005280.3	EME1	0.959288	0.00245244
AC005280.3	SLC45A3	0.959262	0.00245561
AC005280.3	TMEM132E	-0.959237	0.00245859
AC005280.3	ATXN7L2	-0.959177	0.0024657
AC005280.3	NLGN1	-0.959035	0.00248288
AC005280.3	KCNT2	-0.958878	0.00250179
AC005280.3	ITGB4	-0.958739	0.00251864
AC005280.3	PI15	-0.958604	0.00253496
AC005280.3	ELOVL6	0.958456	0.00255296
AC005280.3	KIF22	0.95839	0.00256107
AC005280.3	LFNG	-0.958321	0.00256957
AC005280.3	AURKB	0.958213	0.00258277
AC005280.3	MLKL	0.958079	0.00259916
AC005280.3	PTGIR	0.957925	0.00261817
AC005280.3	PRR11	0.957899	0.00262137
AC005280.3	UBE2C	0.957886	0.00262306
AC005280.3	AC068831.7	0.957758	0.00263894
AC005280.3	ALPL	-0.957666	0.00265036
AC005280.3	GINS4	0.957634	0.0026543
AC005280.3	GRP	0.957583	0.0026606
AC005280.3	MN1	-0.957548	0.00266502
AC005280.3	ADCY7	0.957529	0.00266738
AC005280.3	CXCL5	0.957326	0.00269275
AC005280.3	BMP6	-0.957325	0.00269291
AC005280.3	SLC6A15	0.957307	0.00269514
AC005280.3	TGFB2	-0.957158	0.00271386
AC005280.3	ASPHD2	0.957133	0.00271694
AC005280.3	NEFM	0.957105	0.0027205
AC005280.3	JUND	-0.956968	0.0027378
AC005280.3	SDK1	0.956966	0.00273799
AC005280.3	NXNL2	-0.956942	0.00274111
AC005280.3	S100A13	0.956901	0.00274629
AC005280.3	GLRX	0.956587	0.00278615
AC005280.3	PPP1R13L	-0.956068	0.00285259
AC005280.3	MCHR1	0.955755	0.00289317
AC005280.3	PROCR	0.955728	0.00289664
AC005280.3	PLEK2	0.955726	0.00289683
AC005280.3	B3GALT2	-0.955603	0.00291289
AC005280.3	TMTC2	-0.955576	0.00291634
AC005280.3	IQGAP3	0.955565	0.00291777
AC005280.3	PDK3	0.95554	0.00292103
AC005280.3	SLC43A3	0.955434	0.00293491
AC005280.3	DLK2	-0.955412	0.00293784
AC005280.3	HIVEP1	-0.955387	0.00294103
AC005280.3	PSORS1C1	-0.955159	0.00297103
AC005280.3	DLEC1	-0.955015	0.00298991
AC005280.3	ASPN	-0.95489	0.00300651
AC005280.3	SYNDIG1	0.954734	0.00302708
AC005280.3	PSG3	-0.954651	0.00303811
AC005280.3	CACNA1H	-0.954645	0.00303901
AC005280.3	HEPHL1	0.954619	0.0030424
AC005280.3	AC114490.3	-0.954599	0.0030451
AC005280.3	FER1L6	0.95453	0.00305423
AC005280.3	PDE1A	-0.954525	0.00305492
AC005280.3	STEAP3	0.954209	0.00309726
AC005280.3	C2CD2	0.954199	0.00309854
AC005280.3	ADRA2A	-0.954054	0.00311807
AC005280.3	BCAT1	-0.954015	0.00312336
AC005280.3	PGF	0.953876	0.00314204
AC005280.3	POLQ	0.953837	0.00314728
AC005280.3	ACKR3	-0.953772	0.0031562
AC005280.3	TMEM154	0.953645	0.00317341
AC005280.3	TRIP13	0.953505	0.0031924
AC005280.3	RARRES1	-0.953462	0.00319822
AC005280.3	VLDLR	-0.953443	0.00320084
AC005280.3	BBOF1	-0.95319	0.00323543
AC005280.3	PTPRN2	0.953082	0.00325033
AC005280.3	PROSER2	-0.952991	0.00326286
AC005280.3	GDF6	-0.952981	0.00326419
AC005280.3	ABCA6	0.952908	0.00327424
AC005280.3	HCRTR1	-0.952808	0.0032881
AC005280.3	FAM111B	0.952271	0.00336268
AC005280.3	ABI3BP	-0.951935	0.00340981
AC005280.3	SCN3B	-0.951878	0.00341794
AC005280.3	KCNK15	-0.951761	0.00343442
AC005280.3	STEAP1B	0.951756	0.00343511
AC005280.3	GUCY1A1	-0.951713	0.00344113
AC005280.3	RIN1	0.951707	0.00344197
AC005280.3	IL13RA2	0.951582	0.00345975
AC005280.3	STAC	-0.95144	0.00347982
AC005280.3	SERPINB7	-0.951384	0.00348777
AC005280.3	TAGLN3	0.951237	0.00350871
AC005280.3	DKK2	-0.950728	0.00358174
AC005280.3	TMEM156	0.950579	0.00360323
AC005280.3	AC074143.2	-0.950295	0.00364446
AC005280.3	LIMD1	0.950187	0.00366024
AC005280.3	UHRF1BP1	-0.950125	0.00366922
AC005280.3	COLEC10	0.950081	0.0036757
AC005696.4	MYOC	0.993758	5.83302e-05
AC005696.4	FZD5	0.992638	8.11015e-05
AC005696.4	ART5	0.98595	0.0002947
AC005696.4	TMEM176B	0.984772	0.00034605
AC005696.4	FAM78A	-0.982326	0.000465784
AC005696.4	TMIE	0.981189	0.000527467
AC005696.4	SLC2A9	0.981047	0.000535395
AC005696.4	FBXW10	0.98015	0.000587118
AC005696.4	ZNF711	0.979631	0.000618125
AC005696.4	MGAT3	0.979412	0.000631453
AC005696.4	PAWR	0.978859	0.000665675
AC005696.4	LRRTM2	-0.977595	0.000747384
AC005696.4	B3GALT2	0.977179	0.000775264
AC005696.4	EPPK1	0.977017	0.000786243
AC005696.4	NDC80	-0.975555	0.000889026
AC005696.4	STAC	0.974593	0.000960086
AC005696.4	KBTBD11	0.973883	0.0010142
AC005696.4	TTC36	0.973637	0.00103336
AC005696.4	IFI6	0.973447	0.0010482
AC005696.4	DLEC1	0.972966	0.00108637
AC005696.4	CXCL6	-0.972766	0.00110247
AC005696.4	CDC25C	-0.972376	0.0011341
AC005696.4	KDM7A	0.972134	0.00115399
AC005696.4	PCDH10	0.972028	0.00116273
AC005696.4	ODF3B	0.971247	0.00122823
AC005696.4	BCAT1	0.970426	0.00129901
AC005696.4	AFF2	0.970012	0.00133543
AC005696.4	RIMBP3B	-0.969943	0.00134155
AC005696.4	PSG3	0.969593	0.00137278
AC005696.4	PSG1	0.967505	0.00156675
AC005696.4	NKAIN1	0.966996	0.0016159
AC005696.4	KRT15	-0.966576	0.00165704
AC005696.4	PLSCR4	0.966321	0.00168236
AC005696.4	SCN9A	0.965924	0.00172199
AC005696.4	PALM	0.965715	0.00174309
AC005696.4	MMP23B	0.965164	0.0017992
AC005696.4	SYBU	0.96471	0.00184615
AC005696.4	ARHGAP9	0.96328	0.00199778
AC005696.4	CPN2	0.96316	0.00201074
AC005696.4	ADAM12	0.962407	0.00209332
AC005696.4	PTPRN2	-0.961544	0.0021899
AC005696.4	FZD4	0.96149	0.00219601
AC005696.4	KRT33B	0.959511	0.00242579
AC005696.4	CXCL14	0.959488	0.00242857
AC005696.4	TSPAN2	0.95843	0.00255612
AC005696.4	ASPN	0.95794	0.00261635
AC005696.4	SDC2	0.957383	0.00268558
AC005696.4	MYB	-0.95735	0.00268969
AC005696.4	DNAH12	0.957326	0.0026927
AC005696.4	PODXL	-0.957306	0.00269527
AC005696.4	SFRP4	0.956901	0.0027462
AC005696.4	PLEKHA6	0.956285	0.00282468
AC005696.4	GHR	0.955706	0.00289944
AC005696.4	RARRES1	0.954751	0.0030249
AC005696.4	ANXA3	0.954419	0.00306908
AC005696.4	RHOBTB1	0.954372	0.00307539
AC005696.4	ENTPD7	0.953555	0.00318558
AC005696.4	PLCE1	0.953549	0.00318636
AC005696.4	CLIC3	0.95311	0.00324651
AC005696.4	MTHFD1L	0.953016	0.00325943
AC005696.4	GPD2	-0.952635	0.00331198
AC005696.4	ROR2	0.952156	0.00337875
AC005696.4	KCNJ8	0.952031	0.00339639
AC005696.4	DHRS13	-0.95202	0.00339783
AC005696.4	CCDC81	0.951766	0.00343367
AC005696.4	ENPP4	0.951654	0.00344947
AC005696.4	PTPRQ	0.951617	0.0034548
AC005696.4	NLGN1	0.951473	0.00347513
AC005696.4	RNF41	0.95135	0.00349269
AC005696.4	CCL11	0.951123	0.00352508
AC005696.4	TENM2	0.951106	0.00352745
AC005696.4	STEAP1B	-0.950978	0.00354581
AC005696.4	ZNF185	0.950318	0.00364116
AC005696.4	CMKLR1	-0.95	0.00368757
AC005736.1	STAC	0.996912	1.42934e-05
AC005736.1	RASGRP1	0.99634	2.00686e-05
AC005736.1	RARRES1	0.99505	3.67003e-05
AC005736.1	KDM7A	0.994944	3.82776e-05
AC005736.1	NLGN1	0.994866	3.94639e-05
AC005736.1	VLDLR	0.992413	8.61174e-05
AC005736.1	PLCE1	0.992413	8.61179e-05
AC005736.1	ART5	0.992333	8.79515e-05
AC005736.1	DLEC1	0.991807	0.00010041
AC005736.1	KRT33B	0.991391	0.000110851
AC005736.1	GBP1	0.990499	0.00013498
AC005736.1	FZD4	0.990226	0.000142842
AC005736.1	IQCN	0.989991	0.000149776
AC005736.1	NIPAL4	0.989575	0.00016245
AC005736.1	TMEM91	0.989511	0.000164447
AC005736.1	TENM2	0.988656	0.000192298
AC005736.1	TNFSF18	0.988555	0.000195719
AC005736.1	ZNF185	0.988151	0.000209754
AC005736.1	LYPD1	0.987333	0.000239659
AC005736.1	TRIB2	-0.98712	0.00024779
AC005736.1	LYPD6	0.986983	0.000253053
AC005736.1	IFIT2	0.986767	0.000261503
AC005736.1	LGI4	0.986583	0.000268805
AC005736.1	ASPN	0.986317	0.000279543
AC005736.1	CDC25C	-0.985963	0.000294172
AC005736.1	PSG3	0.985477	0.00031486
AC005736.1	CLIC3	0.985143	0.000329452
AC005736.1	EPSTI1	0.9848	0.000344796
AC005736.1	LIN7A	0.984787	0.000345399
AC005736.1	PDZD2	-0.984615	0.000353239
AC005736.1	TMIE	0.984608	0.000353566
AC005736.1	RNF41	0.984571	0.000355226
AC005736.1	GRAMD2B	0.984478	0.000359515
AC005736.1	FAM78A	-0.984345	0.00036568
AC005736.1	MOV10L1	0.984314	0.000367133
AC005736.1	CPA4	0.984252	0.000370036
AC005736.1	OLR1	0.984136	0.000375514
AC005736.1	ENOX1	0.983914	0.000386043
AC005736.1	PLCD4	-0.983718	0.000395478
AC005736.1	MTHFD1L	0.983645	0.000399061
AC005736.1	PSG1	0.983617	0.000400422
AC005736.1	FOS	0.983462	0.000407997
AC005736.1	SCN9A	0.983239	0.00041906
AC005736.1	PLAC8	0.983083	0.000426852
AC005736.1	PLSCR4	0.982925	0.000434867
AC005736.1	EHBP1	0.982854	0.000438441
AC005736.1	KRT15	-0.982482	0.000457657
AC005736.1	VDR	0.982372	0.00046338
AC005736.1	SGCD	0.982323	0.000465957
AC005736.1	RHBDF2	-0.982246	0.000470035
AC005736.1	NKAIN1	0.981894	0.000488793
AC005736.1	TMEM117	0.981761	0.000495934
AC005736.1	TRIM29	0.981698	0.000499399
AC005736.1	CDA	0.981551	0.000507427
AC005736.1	DBP	0.981225	0.00052544
AC005736.1	RIMBP3B	-0.981195	0.000527116
AC005736.1	RORA	0.981042	0.000535699
AC005736.1	POSTN	0.980973	0.000539603
AC005736.1	C1S	0.980678	0.000556404
AC005736.1	OFD1	-0.980476	0.000568057
AC005736.1	C1R	0.980274	0.000579822
AC005736.1	CCDC80	0.980249	0.000581329
AC005736.1	ADAMTS14	-0.979912	0.000601238
AC005736.1	SYBU	0.979844	0.000605319
AC005736.1	SLC43A3	-0.979835	0.000605826
AC005736.1	ADAMTSL5	0.979797	0.000608108
AC005736.1	CLEC3B	0.979726	0.000612384
AC005736.1	CORIN	0.979702	0.000613812
AC005736.1	B3GALT2	0.979314	0.000637448
AC005736.1	TMSB15A	-0.978711	0.00067499
AC005736.1	ADAMTS10	0.978144	0.000711331
AC005736.1	UHRF1BP1	0.977992	0.00072121
AC005736.1	MAP2	0.977985	0.000721688
AC005736.1	LRRC15	0.977982	0.00072188
AC005736.1	HIVEP1	0.977948	0.000724104
AC005736.1	CYP1B1	0.977926	0.000725544
AC005736.1	NDC80	-0.97781	0.000733101
AC005736.1	LRRC32	0.977631	0.000744955
AC005736.1	WEE1	0.977179	0.000775229
AC005736.1	RPS6KA2	0.977159	0.00077658
AC005736.1	TMTC1	0.977139	0.000777951
AC005736.1	ADM	0.977088	0.000781424
AC005736.1	MYOC	0.977073	0.000782459
AC005736.1	CADM4	0.977053	0.000783808
AC005736.1	SYT1	0.976904	0.000794008
AC005736.1	CXCL14	0.976805	0.000800759
AC005736.1	CCL11	0.976752	0.000804426
AC005736.1	LMCD1	0.976712	0.000807192
AC005736.1	MMP24	0.976571	0.00081696
AC005736.1	ATF4	0.976485	0.000822928
AC005736.1	PDE1C	0.976391	0.000829485
AC005736.1	SLC2A9	0.976384	0.000830008
AC005736.1	ADGRG6	0.976319	0.000834518
AC005736.1	TACSTD2	0.97611	0.000849285
AC005736.1	EPPK1	0.976003	0.000856858
AC005736.1	FOXO1	0.976002	0.000856968
AC005736.1	ALDH1L2	0.975953	0.000860412
AC005736.1	WFDC1	0.975952	0.000860482
AC005736.1	IGSF10	0.975529	0.000890898
AC005736.1	FAT4	0.975528	0.000890962
AC005736.1	FIGN	0.975505	0.000892688
AC005736.1	ANGPT1	0.975414	0.000899276
AC005736.1	RITA1	-0.975285	0.000908681
AC005736.1	PDE1A	0.975193	0.000915443
AC005736.1	VGLL3	0.975061	0.000925203
AC005736.1	GPLD1	0.974955	0.00093299
AC005736.1	POC1A	-0.974713	0.000951047
AC005736.1	IL20RB	0.974547	0.000963553
AC005736.1	MAPKBP1	-0.974478	0.000968763
AC005736.1	FOSB	0.974094	0.000997997
AC005736.1	SLC7A11	0.973888	0.00101383
AC005736.1	HLA-DMA	0.973829	0.00101844
AC005736.1	PALM	0.973738	0.00102544
AC005736.1	SYTL5	0.973189	0.00106857
AC005736.1	SERPING1	0.973135	0.00107293
AC005736.1	CFH	0.973132	0.00107314
AC005736.1	SVEP1	0.973082	0.00107715
AC005736.1	HID1	-0.972933	0.001089
AC005736.1	ANO3	0.972424	0.0011302
AC005736.1	ALPK2	0.972079	0.00115846
AC005736.1	CHRM2	0.972016	0.00116369
AC005736.1	SLC40A1	0.97196	0.00116838
AC005736.1	SLC24A3	-0.97194	0.00117002
AC005736.1	AMIGO2	0.971921	0.00117159
AC005736.1	AFF2	0.971762	0.00118485
AC005736.1	TMEM47	0.971108	0.0012401
AC005736.1	DCLK2	0.970947	0.00125387
AC005736.1	GABRE	0.970938	0.00125462
AC005736.1	BST1	0.970894	0.00125842
AC005736.1	ACOT12	0.970857	0.0012616
AC005736.1	NEGR1	0.970758	0.00127018
AC005736.1	HMCN1	0.97066	0.00127863
AC005736.1	TMEM51	-0.970635	0.00128076
AC005736.1	SLC22A4	-0.970619	0.0012822
AC005736.1	KRTAP1-5	0.970423	0.00129923
AC005736.1	PDE5A	0.970415	0.00129995
AC005736.1	PCDH10	0.970297	0.00131026
AC005736.1	SELPLG	-0.970294	0.00131054
AC005736.1	OLFML2B	-0.970152	0.00132309
AC005736.1	SMPDL3A	0.97015	0.00132327
AC005736.1	PLXNC1	0.970124	0.00132551
AC005736.1	NAGS	-0.969644	0.00136821
AC005736.1	FERMT2	0.969594	0.00137269
AC005736.1	FBXW10	0.969439	0.00138671
AC005736.1	ASNS	0.969394	0.00139078
AC005736.1	HS3ST3A1	-0.969379	0.0013921
AC005736.1	ARRDC4	0.969254	0.00140343
AC005736.1	ELOVL6	-0.969216	0.0014069
AC005736.1	VCAM1	0.969147	0.00141317
AC005736.1	A2M	0.969033	0.00142357
AC005736.1	SLC4A8	-0.968977	0.00142872
AC005736.1	CPN2	0.968973	0.00142905
AC005736.1	MXRA5	0.968913	0.00143454
AC005736.1	UGCG	0.968756	0.00144904
AC005736.1	GRIA1	0.968717	0.00145265
AC005736.1	RAP1GAP2	-0.968607	0.0014628
AC005736.1	MUC1	0.968528	0.00147018
AC005736.1	DHRS13	-0.968378	0.00148413
AC005736.1	PTPRQ	0.968368	0.00148507
AC005736.1	SAMD5	0.968364	0.0014854
AC005736.1	FBLN5	0.968264	0.00149477
AC005736.1	SLC3A2	0.96815	0.00150549
AC005736.1	COL3A1	0.968125	0.00150785
AC005736.1	FMNL3	-0.968012	0.00151845
AC005736.1	FSTL1	0.967996	0.00151995
AC005736.1	ABCC9	0.967985	0.00152104
AC005736.1	RELT	-0.967914	0.00152779
AC005736.1	OTX1	0.967883	0.0015307
AC005736.1	COBLL1	0.967848	0.00153397
AC005736.1	TPCN1	-0.967822	0.00153649
AC005736.1	VEPH1	-0.967807	0.00153791
AC005736.1	PTPRN2	-0.967682	0.00154983
AC005736.1	EFEMP1	0.967655	0.00155236
AC005736.1	AC074143.2	0.967582	0.00155933
AC005736.1	GREM2	-0.967331	0.00158345
AC005736.1	ADAM12	0.967285	0.00158789
AC005736.1	WARS	0.967181	0.00159792
AC005736.1	TNFRSF6B	-0.967108	0.00160504
AC005736.1	ALCAM	0.966904	0.00162492
AC005736.1	BACH2	-0.966829	0.00163223
AC005736.1	SLC38A1	0.966771	0.00163793
AC005736.1	MMP10	-0.966467	0.00166779
AC005736.1	NCAPG	-0.966378	0.00167669
AC005736.1	MKX	0.966249	0.00168948
AC005736.1	RGS17	-0.966072	0.00170711
AC005736.1	EXPH5	0.966002	0.00171415
AC005736.1	RASGRF2	-0.965883	0.00172611
AC005736.1	DKK2	0.965878	0.00172665
AC005736.1	SLC38A11	0.965794	0.00173504
AC005736.1	SEMA5A	0.965787	0.00173577
AC005736.1	ADM2	0.965746	0.00173996
AC005736.1	BCAT1	0.965648	0.00174979
AC005736.1	FZD5	0.965602	0.00175448
AC005736.1	PSG4	0.965581	0.00175665
AC005736.1	POU2F2	-0.965451	0.00176979
AC005736.1	GPR26	-0.965346	0.00178051
AC005736.1	C3AR1	-0.965217	0.00179371
AC005736.1	CASP10	-0.96508	0.00180783
AC005736.1	PRR16	-0.965079	0.00180788
AC005736.1	CHST2	-0.965069	0.00180899
AC005736.1	CNIH3	-0.96503	0.00181299
AC005736.1	GALNT6	-0.96458	0.00185962
AC005736.1	CAMK1G	-0.964571	0.00186054
AC005736.1	PODXL	-0.964505	0.00186747
AC005736.1	IL4R	-0.964458	0.00187242
AC005736.1	KLF4	0.964369	0.00188171
AC005736.1	CPZ	0.964182	0.00190144
AC005736.1	TMTC2	0.964115	0.00190852
AC005736.1	VIT	0.96409	0.00191113
AC005736.1	SEMA3D	0.96367	0.00195579
AC005736.1	NBL1	-0.963602	0.00196306
AC005736.1	INA	-0.96347	0.00197733
AC005736.1	ENTPD7	0.963367	0.00198836
AC005736.1	ARHGEF39	-0.96336	0.00198911
AC005736.1	RHOBTB1	0.963297	0.001996
AC005736.1	PCSK9	0.963063	0.00202129
AC005736.1	SLC7A8	-0.963049	0.00202289
AC005736.1	SLC37A2	-0.962848	0.00204479
AC005736.1	SEMA3C	0.962809	0.00204903
AC005736.1	ETV1	-0.962801	0.00204989
AC005736.1	ZNF711	0.962757	0.00205471
AC005736.1	H1F0	-0.962666	0.00206476
AC005736.1	FHL1	0.962533	0.00207934
AC005736.1	EFL1	-0.962529	0.00207985
AC005736.1	FAM20C	-0.962472	0.00208613
AC005736.1	CORO2B	-0.962468	0.00208655
AC005736.1	DCN	0.9624	0.00209401
AC005736.1	TMEM176B	0.962246	0.00211109
AC005736.1	LAMA2	0.962224	0.00211354
AC005736.1	NRROS	-0.962192	0.00211713
AC005736.1	NBPF3	0.96216	0.00212073
AC005736.1	SCN3B	0.962102	0.00212714
AC005736.1	TFAP2C	-0.962087	0.00212886
AC005736.1	RASSF2	0.962027	0.0021355
AC005736.1	CCDC148	0.961995	0.00213914
AC005736.1	CFD	0.961754	0.00216617
AC005736.1	SERPINH1	0.961749	0.00216674
AC005736.1	FN1	0.96168	0.00217451
AC005736.1	COL11A1	0.961587	0.00218497
AC005736.1	WNT2B	0.961509	0.00219383
AC005736.1	MAMLD1	0.961444	0.00220122
AC005736.1	ELK3	-0.961231	0.00222542
AC005736.1	CPNE2	-0.961139	0.00223587
AC005736.1	PSG5	0.961113	0.00223893
AC005736.1	NR4A3	-0.961024	0.0022491
AC005736.1	BICC1	0.961022	0.00224928
AC005736.1	KCNMA1	-0.960968	0.0022555
AC005736.1	CMKLR1	-0.960961	0.0022563
AC005736.1	FGFR3	0.960735	0.00228233
AC005736.1	RFX8	-0.960731	0.00228283
AC005736.1	ACTA2	0.960608	0.00229706
AC005736.1	ALDH1A1	0.960591	0.00229906
AC005736.1	PDE7B	-0.960565	0.00230202
AC005736.1	SPTB	-0.96047	0.00231302
AC005736.1	HPCAL1	-0.960456	0.00231464
AC005736.1	TRPV2	-0.960414	0.00231958
AC005736.1	PLPPR4	0.960406	0.00232046
AC005736.1	FHOD1	-0.960389	0.00232246
AC005736.1	NTNG1	-0.960311	0.0023316
AC005736.1	GPC6	0.960274	0.00233587
AC005736.1	ROR2	0.960255	0.00233815
AC005736.1	SLC1A7	0.960229	0.00234112
AC005736.1	SH3BGRL3	-0.960221	0.00234207
AC005736.1	PLK2	0.960205	0.00234394
AC005736.1	TRAM2	-0.960183	0.00234649
AC005736.1	ITIH5	0.960152	0.00235012
AC005736.1	SYPL2	0.960127	0.00235309
AC005736.1	PRXL2A	-0.960121	0.00235379
AC005736.1	ORAI1	-0.960009	0.00236689
AC005736.1	PITPNC1	-0.959912	0.00237841
AC005736.1	MFAP5	0.95982	0.00238916
AC005736.1	NDUFA4L2	0.959806	0.00239091
AC005736.1	RGS3	-0.959793	0.00239243
AC005736.1	STEAP1B	-0.959697	0.00240378
AC005736.1	PTTG1	-0.95959	0.0024165
AC005736.1	SOCS2	-0.959563	0.00241966
AC005736.1	COL12A1	0.959416	0.00243715
AC005736.1	PFKFB3	-0.959335	0.00244686
AC005736.1	CD82	-0.959303	0.00245062
AC005736.1	PAQR8	-0.959236	0.00245874
AC005736.1	ITGA10	-0.959191	0.00246412
AC005736.1	TM6SF2	0.959127	0.00247179
AC005736.1	TLCD2	0.95899	0.00248819
AC005736.1	CCND1	-0.95895	0.00249308
AC005736.1	MYH15	-0.958879	0.00250168
AC005736.1	FAP	0.958853	0.00250476
AC005736.1	PLA2G4C	-0.958794	0.00251195
AC005736.1	IL1RN	-0.958653	0.00252898
AC005736.1	EVI2A	-0.958636	0.00253114
AC005736.1	SCN1A	0.958593	0.00253625
AC005736.1	COL1A2	0.958584	0.00253746
AC005736.1	MID1	0.958558	0.00254052
AC005736.1	AIM2	-0.958557	0.0025407
AC005736.1	SYNPO	0.958526	0.00254447
AC005736.1	B4GALT4	0.958498	0.00254785
AC005736.1	DLL4	-0.958493	0.00254844
AC005736.1	PTGS1	-0.958434	0.00255574
AC005736.1	LPXN	-0.958388	0.00256133
AC005736.1	INCA1	0.95837	0.00256348
AC005736.1	FHDC1	0.958342	0.00256695
AC005736.1	ADGRL2	0.958295	0.00257265
AC005736.1	E2F7	-0.958135	0.00259232
AC005736.1	BAMBI	0.958124	0.00259369
AC005736.1	CTSS	-0.958106	0.00259593
AC005736.1	AC005747.1	0.958091	0.00259774
AC005736.1	PLAT	-0.958085	0.00259843
AC005736.1	SDC2	0.958071	0.00260026
AC005736.1	MTHFD2	0.958054	0.00260226
AC005736.1	LTBP1	-0.958046	0.00260334
AC005736.1	C1QBP	-0.957789	0.00263505
AC005736.1	ADAMTS1	0.957694	0.00264684
AC005736.1	SEMA7A	-0.957672	0.0026496
AC005736.1	TNFRSF21	-0.9575	0.00267101
AC005736.1	APBA2	-0.957441	0.00267839
AC005736.1	GK	-0.957437	0.0026789
AC005736.1	CEBPG	0.957418	0.00268126
AC005736.1	ASS1	-0.957299	0.00269614
AC005736.1	PRELP	0.957264	0.00270051
AC005736.1	RAC2	-0.95725	0.00270233
AC005736.1	FSTL3	0.957143	0.00271568
AC005736.1	TRAF3IP2	-0.957106	0.00272043
AC005736.1	THRB	0.957063	0.00272576
AC005736.1	CXCL6	-0.95694	0.00274136
AC005736.1	RIN1	-0.956914	0.00274458
AC005736.1	NTSR1	-0.956867	0.00275051
AC005736.1	ISG20	-0.956841	0.00275384
AC005736.1	MMP1	-0.956826	0.00275578
AC005736.1	GFRA1	0.956781	0.00276148
AC005736.1	GPRIN1	-0.956763	0.0027637
AC005736.1	PAMR1	-0.956659	0.00277691
AC005736.1	TNFRSF19	-0.956611	0.00278307
AC005736.1	GPR68	-0.956587	0.00278618
AC005736.1	PKM	-0.956547	0.00279121
AC005736.1	COL1A1	0.956541	0.00279203
AC005736.1	NATD1	0.956501	0.00279713
AC005736.1	WWTR1	-0.956447	0.00280404
AC005736.1	IQCD	-0.956298	0.00282301
AC005736.1	AMPD3	-0.956236	0.00283101
AC005736.1	MFAP4	0.95618	0.00283826
AC005736.1	KREMEN1	-0.95615	0.0028421
AC005736.1	SPARC	0.956111	0.00284713
AC005736.1	CENPH	-0.956107	0.00284759
AC005736.1	MSX1	-0.956105	0.00284781
AC005736.1	SH2B3	-0.956065	0.00285303
AC005736.1	ASF1B	-0.956027	0.00285787
AC005736.1	ADORA2A	-0.956021	0.00285865
AC005736.1	WNT5A	0.955974	0.00286479
AC005736.1	ICOSLG	-0.955854	0.00288025
AC005736.1	ISM1	-0.955817	0.00288504
AC005736.1	DKK1	0.955727	0.0028968
AC005736.1	EHD3	-0.955698	0.00290053
AC005736.1	CDCP1	-0.955665	0.00290478
AC005736.1	DAB1	0.955658	0.00290567
AC005736.1	S1PR3	0.955607	0.00291235
AC005736.1	STC1	-0.955606	0.00291243
AC005736.1	TM4SF1	-0.955468	0.00293052
AC005736.1	RAPGEF2	0.955411	0.00293794
AC005736.1	PHLDA1	-0.955322	0.00294954
AC005736.1	HSPG2	0.955289	0.00295386
AC005736.1	OSR2	0.955222	0.00296276
AC005736.1	ADGRA2	0.955204	0.00296513
AC005736.1	IL1B	-0.955182	0.00296795
AC005736.1	DLGAP5	-0.955109	0.00297756
AC005736.1	ECM2	0.955098	0.00297899
AC005736.1	TRPA1	-0.955094	0.00297949
AC005736.1	TGFB3	0.954951	0.00299837
AC005736.1	SLC7A5	0.954868	0.00300939
AC005736.1	EPHX4	-0.954832	0.00301414
AC005736.1	FJX1	-0.954826	0.00301499
AC005736.1	FZD8	-0.954825	0.00301505
AC005736.1	CREB3L1	0.954816	0.00301631
AC005736.1	ECI1	0.954727	0.00302808
AC005736.1	ANPEP	-0.954702	0.00303133
AC005736.1	SIX2	0.954637	0.00304001
AC005736.1	GUCY1A2	0.954631	0.00304087
AC005736.1	CD68	-0.954568	0.00304917
AC005736.1	RNF150	0.954496	0.00305884
AC005736.1	DAPK1	0.954401	0.00307154
AC005736.1	GAP43	-0.954311	0.00308356
AC005736.1	RAMP1	0.954271	0.00308887
AC005736.1	KIF2C	-0.954206	0.00309761
AC005736.1	FZD7	0.954153	0.00310479
AC005736.1	CDCA8	-0.954118	0.00310938
AC005736.1	RAPH1	0.954071	0.00311578
AC005736.1	STMN3	-0.95402	0.00312268
AC005736.1	DACH1	-0.953908	0.00313779
AC005736.1	CYP26B1	-0.953889	0.00314025
AC005736.1	FMOD	0.95384	0.00314694
AC005736.1	ABLIM3	-0.953703	0.00316548
AC005736.1	DDIT3	0.953593	0.00318047
AC005736.1	XPOT	0.95352	0.00319042
AC005736.1	KIAA1549L	-0.953475	0.00319646
AC005736.1	SLIT3	0.953418	0.00320429
AC005736.1	CD34	0.953349	0.00321376
AC005736.1	DBNDD1	-0.95331	0.00321904
AC005736.1	VSIR	0.953256	0.00322647
AC005736.1	NAP1L3	0.95313	0.00324375
AC005736.1	TAGLN	0.953073	0.00325151
AC005736.1	NTN4	0.953054	0.00325419
AC005736.1	ADAMTS5	0.952989	0.00326307
AC005736.1	FBN2	0.952891	0.00327659
AC005736.1	TNC	-0.952837	0.00328409
AC005736.1	TFB1M	-0.952775	0.00329262
AC005736.1	HNMT	0.952764	0.00329411
AC005736.1	SH3BP5	0.952715	0.00330095
AC005736.1	CSF3	-0.952699	0.00330313
AC005736.1	TINAGL1	0.952678	0.00330604
AC005736.1	CRISPLD2	0.952655	0.00330929
AC005736.1	CENPK	-0.952596	0.00331738
AC005736.1	SLC45A3	-0.952567	0.00332142
AC005736.1	VIM	-0.952504	0.00333019
AC005736.1	FIBCD1	-0.952499	0.00333095
AC005736.1	AURKB	-0.952423	0.00334146
AC005736.1	ST3GAL5	-0.952342	0.00335274
AC005736.1	CRYBG1	-0.952339	0.00335324
AC005736.1	IGFBP5	0.952284	0.00336084
AC005736.1	TAFA5	0.952138	0.00338129
AC005736.1	HMMR	-0.952115	0.00338462
AC005736.1	SLC8A1	0.952019	0.0033981
AC005736.1	PSAT1	0.951982	0.00340329
AC005736.1	TPX2	-0.951893	0.00341572
AC005736.1	PHKA1	-0.95186	0.00342047
AC005736.1	GLIS2	0.951837	0.00342358
AC005736.1	PGRMC2	0.951828	0.00342494
AC005736.1	ODF3B	0.951787	0.00343072
AC005736.1	SMAGP	-0.951722	0.00343992
AC005736.1	EGR2	0.951633	0.00345253
AC005736.1	COL10A1	-0.951581	0.00345987
AC005736.1	FMN1	-0.951573	0.00346096
AC005736.1	PLAU	-0.951553	0.00346375
AC005736.1	AHNAK2	-0.951552	0.00346401
AC005736.1	RHOBTB3	0.951518	0.00346884
AC005736.1	ETHE1	0.95149	0.00347275
AC005736.1	TMEM26	-0.951416	0.00348324
AC005736.1	RAB27A	-0.951406	0.00348472
AC005736.1	GLUL	-0.951369	0.00349
AC005736.1	SYT7	-0.95129	0.00350118
AC005736.1	ARHGAP22	-0.951199	0.00351417
AC005736.1	LUM	0.951129	0.00352419
AC005736.1	RUNDC3B	0.951023	0.00353944
AC005736.1	LOX	0.950783	0.00357382
AC005736.1	CES1	0.950686	0.00358783
AC005736.1	SLC6A9	0.950646	0.00359366
AC005736.1	MAP6	0.950642	0.00359423
AC005736.1	S100A16	-0.950615	0.00359811
AC005736.1	GPM6B	-0.950501	0.00361461
AC005736.1	TSPAN14	-0.95046	0.00362054
AC005736.1	NOG	-0.950435	0.0036242
AC005736.1	FP565260.3	-0.950434	0.00362428
AC005736.1	SQOR	-0.950334	0.00363878
AC005736.1	MRVI1	0.950307	0.00364267
AC005736.1	TMEM130	0.950298	0.00364405
AC005736.1	TCAF2	-0.95024	0.00365248
AC005736.1	GATA6	0.950179	0.00366142
AC005736.1	LRRC8C	-0.950129	0.00366866
AC005736.1	NTF3	0.950005	0.00368682
AC006449.5	SLC26A10	0.997188	1.18498e-05
AC006449.5	HR	0.996423	1.91719e-05
AC006449.5	IFI44L	0.99455	4.448e-05
AC006449.5	OMD	0.981479	0.000511343
AC006449.5	KLHDC7B	0.978931	0.00066119
AC006449.5	HSD17B6	0.97691	0.00079359
AC006449.5	PLK5	0.974006	0.00100471
AC006449.5	BPI	0.972961	0.00108678
AC006449.5	MYO1G	0.9701	0.00132765
AC006449.5	STRC	0.967679	0.00155011
AC006449.5	HPSE	0.961967	0.00214221
AC006449.5	RASSF7	0.959881	0.00238199
AC006449.5	ARHGAP8	0.959265	0.0024552
AC006449.5	CES1	0.957599	0.0026586
AC006449.5	FIGN	0.953043	0.00325569
AC006449.5	ACOT12	0.952777	0.00329241
AC007996.1	OXCT2	0.989351	0.000169514
AC007996.1	ADAM28	0.977973	0.000722457
AC007996.1	BTBD11	0.971651	0.00119415
AC007996.1	TTC29	0.965344	0.00178077
AC007996.1	INSC	0.959991	0.00236905
AC007996.1	EFCC1	0.958158	0.00258952
AC007996.1	FRMD3	0.956859	0.00275163
AC007996.1	CSGALNACT1	0.956578	0.00278731
AC007996.1	GPR4	0.951179	0.00351703
AC007996.1	SLITRK5	0.95081	0.00357003
AC008147.2	ADAM33	0.997191	1.18221e-05
AC008147.2	INHBE	0.996898	1.44214e-05
AC008147.2	ENPEP	0.995937	2.47278e-05
AC008147.2	SRD5A2	-0.995724	2.7387e-05
AC008147.2	CCL26	-0.995482	3.05774e-05
AC008147.2	DAPK2	0.993576	6.17727e-05
AC008147.2	SELENOP	0.993544	6.23783e-05
AC008147.2	GDF6	0.993074	7.17803e-05
AC008147.2	KLF7	0.99265	8.08243e-05
AC008147.2	SBSPON	0.992523	8.36449e-05
AC008147.2	RACGAP1	-0.992237	9.01508e-05
AC008147.2	KCTD15	0.992089	9.36272e-05
AC008147.2	PDE3A	0.990963	0.00012213
AC008147.2	DLK2	0.990908	0.000123624
AC008147.2	C17orf107	0.990654	0.000130622
AC008147.2	NXPH4	-0.990603	0.000132037
AC008147.2	BMP1	0.990345	0.000139364
AC008147.2	KIF15	-0.990339	0.000139564
AC008147.2	PPP2R2B	0.9902	0.000143595
AC008147.2	UBL4B	0.989207	0.000174093
AC008147.2	PXDNL	-0.988306	0.00020432
AC008147.2	EGR1	0.98816	0.000209435
AC008147.2	C2CD2	-0.988112	0.000211146
AC008147.2	AC068831.7	-0.988045	0.000213513
AC008147.2	NPR3	0.987576	0.000230557
AC008147.2	CACNA1H	0.987106	0.000248329
AC008147.2	TGM1	0.98687	0.000257445
AC008147.2	MEGF6	0.986609	0.000267765
AC008147.2	UNC79	0.986547	0.00027026
AC008147.2	ZNF469	0.986408	0.000275857
AC008147.2	CBSL	0.985702	0.00030518
AC008147.2	NXNL2	0.985492	0.000314198
AC008147.2	AC068580.4	0.984685	0.000350017
AC008147.2	SDCCAG8	-0.984662	0.00035109
AC008147.2	CCN2	0.984284	0.000368565
AC008147.2	PNP	-0.984153	0.000374703
AC008147.2	HLA-F	0.984051	0.000379526
AC008147.2	RUNX1	0.983905	0.00038651
AC008147.2	HAPLN3	0.983745	0.000394204
AC008147.2	NUPR1	0.983725	0.000395166
AC008147.2	CXXC5	0.983685	0.000397083
AC008147.2	PNMA2	0.983457	0.000408258
AC008147.2	NEDD9	0.983424	0.00040989
AC008147.2	C1orf198	0.983134	0.00042429
AC008147.2	RNF157	-0.983098	0.000426115
AC008147.2	ARHGEF4	0.982951	0.000433545
AC008147.2	RARRES2	0.982856	0.00043834
AC008147.2	CCN1	0.982682	0.000447251
AC008147.2	JDP2	0.982588	0.00045215
AC008147.2	SEMA3B	0.982507	0.000456337
AC008147.2	TUFT1	0.982496	0.000456913
AC008147.2	WNK4	-0.982483	0.000457562
AC008147.2	SLC1A4	0.982408	0.000461482
AC008147.2	ITGBL1	0.982385	0.00046268
AC008147.2	ZNF792	-0.982277	0.00046839
AC008147.2	CSRP2	0.982011	0.000482469
AC008147.2	COL15A1	0.981666	0.000501144
AC008147.2	MTCL1	0.981635	0.000502813
AC008147.2	DUSP1	0.98134	0.000519029
AC008147.2	MKI67	-0.981196	0.00052704
AC008147.2	PREX2	0.980998	0.000538181
AC008147.2	FOXE1	0.980947	0.000541059
AC008147.2	BCAM	0.980883	0.00054467
AC008147.2	NPAS1	0.980809	0.000548886
AC008147.2	JPH2	0.980717	0.000554185
AC008147.2	ADAMTS2	0.980702	0.00055504
AC008147.2	ISLR	0.980688	0.000555826
AC008147.2	F3	0.980478	0.000567943
AC008147.2	FSCN2	0.980152	0.000586999
AC008147.2	GXYLT2	0.979983	0.000596994
AC008147.2	GDF7	0.979968	0.000597875
AC008147.2	PTHLH	0.979881	0.000603082
AC008147.2	PLPP4	0.979805	0.000607635
AC008147.2	MGP	0.979788	0.000608679
AC008147.2	SKA3	-0.979625	0.0006185
AC008147.2	NETO1	-0.97955	0.000623013
AC008147.2	KLF5	0.979532	0.000624139
AC008147.2	SPRY4	-0.97934	0.000635834
AC008147.2	LIMS2	0.979223	0.000643057
AC008147.2	SMAD9	0.979153	0.00064735
AC008147.2	TNXB	0.979142	0.000648049
AC008147.2	KCNMB4	0.979085	0.000651552
AC008147.2	ARHGAP28	0.979032	0.000654878
AC008147.2	XKRX	-0.978945	0.000660274
AC008147.2	CSDC2	0.978906	0.000662741
AC008147.2	NFIX	0.978891	0.000663695
AC008147.2	SCFD2	-0.978866	0.000665236
AC008147.2	KIZ	0.978854	0.000666007
AC008147.2	PRR5-ARHGAP8	0.97879	0.000670019
AC008147.2	PITPNM3	0.978761	0.00067187
AC008147.2	MAD2L1	-0.978724	0.000674172
AC008147.2	GADD45B	0.978717	0.000674598
AC008147.2	ARHGAP6	-0.978685	0.00067664
AC008147.2	COL16A1	0.978489	0.000689078
AC008147.2	TRIB3	0.978343	0.000698478
AC008147.2	INHBA	0.978274	0.000702933
AC008147.2	COL4A2	0.978207	0.000707216
AC008147.2	PPP1R13L	0.978053	0.000717225
AC008147.2	COL8A2	0.977979	0.000722033
AC008147.2	CEP55	-0.977916	0.000726144
AC008147.2	PRAG1	0.977916	0.000726148
AC008147.2	TPD52L1	0.977852	0.000730377
AC008147.2	GDF5	0.97776	0.000736443
AC008147.2	ADRA1B	0.977708	0.000739892
AC008147.2	PEAR1	0.977613	0.000746183
AC008147.2	TPM1	0.977591	0.000747609
AC008147.2	KIF26B	0.977445	0.000757325
AC008147.2	CTSH	0.977413	0.000759504
AC008147.2	MARS	0.977339	0.000764485
AC008147.2	DHRS3	0.977325	0.000765412
AC008147.2	PYCR1	0.977145	0.000777563
AC008147.2	PRICKLE1	0.977065	0.000782956
AC008147.2	TOMM34	-0.977064	0.000783038
[truncated: 66,302 more rows]
