# Supplementary material for: RNA sequencing analysis of FGF2-responsive transcriptome in skin fibroblasts
Source: PeerJ. 2021 Jan 15;9:e10671. doi: 10.7717/peerj.10671 (PMC7812929; doi:10.7717/peerj.10671)
Supplement: Supplemental Information 8 [file peerj-09-10671-s008.xlsx]

## Sheet: METADATA  
Additonal file 7. High-throughput sequencing metadata
SERIES
# This section describes the overall experiment.
title	Effect of FGF2on the transcriptome of the human dermal fibroblasts
summary	The current study was to determine the effects of Fibroblast Growth Factor 2 (FGF2) on the transcriptome of adult human dermal fibroblasts. Transcriptional profiles of adult human dermal fibroblasts grown in culture medium (with FGF2 or not) were compared. Comparison of the transcriptomes will allow to identify significantly differentially expressed genes exposure to FGF2, which in turn will allo…
summary	Methods: Human dermal fibroblasts were FGF2 (10ng/ML) treatment for 48h hours. Then, the RNA was extracted for library construction
summary	Results: FGF2-responsive genes were significantly involved in ECM-receptor interaction, PI3K-Akt signaling and Hippo pathway.
overall design	RNA profiles of human dermal fibroblasts were generated by sequencing.
contributor	Ronghu Ke
contributor	Baojin Wu
contributor	Hao He
contributor	Junhao Hu
supplementary file
SAMPLES
# This section lists and describes each of the biological Samples under investgation, as well as any protocols that are specific to individual Samples.
# Additional "processed data file" or "raw file" columns may be included.
Sample name	title	source name	organism	characteristics: celltype	characteristics: treat	characteristics: drug	molecule	description	processed data file	raw file	raw file
R19031538-M1-1	Control1	Human dermal fibroblasts	Homo sapiens	FB	PBS		Total RNA			R19031538-M1-1_combined_R1.fastq.gz	R19031538-M1-1_combined_R2.fastq.gz
R19031538-M1-2	Control2	Human dermal fibroblasts	Homo sapiens	FB	PBS		Total RNA			R19031538-M1-2_combined_R1.fastq.gz	R19031538-M1-2_combined_R2.fastq.gz
R19031538-M1-3	Control3	Human dermal fibroblasts	Homo sapiens	FB	PBS		Total RNA			R19031538-M1-3_combined_R1.fastq.gz	R19031538-M1-3_combined_R2.fastq.gz
R19031538-M1-8	FGF2_8	Human dermal fibroblasts	Homo sapiens	FB	FGF2		Total RNA			R19031538-M1-8_combined_R1.fastq.gz	R19031538-M1-8_combined_R2.fastq.gz
R19031538-M1-9	FGF2_9	Human dermal fibroblasts	Homo sapiens	FB	FGF2		Total RNA			R19031538-M1-9_combined_R1.fastq.gz	R19031538-M1-9_combined_R2.fastq.gz
R19031538-M1-10	FGF2_10	Human dermal fibroblasts	Homo sapiens	FB	FGF2		Total RNA			R19031538-M1-10_combined_R1.fastq.gz	R19031538-M1-10_combined_R2.fastq.gz
R19031538-M1-11	FGF2_11	Human dermal fibroblasts	Homo sapiens	FB	FGF2		Total RNA			R19031538-M1-11_combined_R1.fastq.gz	R19031538-M1-11_combined_R2.fastq.gz
PROTOCOLS
# Any of the protocols below which are applicable to only a subset of Samples should be included as additional columns of the SAMPLES section instead.
growth protocol
treatment protocol	Human dermal fibroblasts were cultured in the absence or presence of 10 ng/mL of FGF2 for 48 h. Then, the total RNA was extracted for sequencing.
extract protocol	Sangon RNA extraction kit (Order NO. B511321)
library construction protocol	RNA libraries were prepared for sequencing using TrueSeq standard Illumina protocols
library strategy	RNA-seq
DATA PROCESSING PIPELINE
# Data processing steps include base-calling, alignment, filtering, peak-calling, generation of normalized abundance measurements etc…
# For each step provide a description, as well as software name, version, parameters, if applicable.
data processing step	Reads cleaning: raw FASTQ files were quality checked using FASTQC . Then fastp was used to quality trim FASTQ files by both read quality and length (Q30 > 20, length > 36).
data processing step	Alignment: clean reads were processed to pseudo-align to human transcriptome GRCh38 using salmon.
data processing step	Quantification: transcriptional level expression was aggregated to gene level expression using tximport. Ensembl release 95 was used to annotate genes.
data processing step	Quality check: sample clustering was performed with principle component analysis analysis and sample to sample distance correlation analysis.
data processing step	DEGs analysis: differential expressed genes were defined by DESeq2 with foldchange > 2 and adjusted p-value < 0.05. DEGs based hypergeometric test and gene set enrichment analysis were produced by clusterProfiler.
genome build	GRCh38
